# Supplementary material for: Synthesis, antimalarial activity, and target binding of dibenzazepine-tethered isoxazolines
Source: Royal Society of Chemistry journal article supplement (doi:10.1039/c5ra17926b), 2015-01-01
Supplement: c5ra17926b1.pdf [file c5ra17926b1.pdf]

## Supporting information

### Synthesis, antimalarial activity, and target binding of dibenzazepine-tethered isoxazolines

Koravangala S. VinayKumar,<sup>a</sup>Gejjalagere S. Lingaraju,<sup>a</sup>Yadaganahalli K. Bommegowda, <sup>a</sup>Ajjampura C. Vinayaka,<sup>a</sup>PriteshBhat,<sup>b</sup>Challanayakanahally S. Pradeepa Kumara,<sup>a</sup>Kanchugarakoppal S. Rangappa,<sup>a</sup>D. ChanneGowda<sup>\*c</sup>and MaralinganadoddiP. Sadashiva<sup>\*a</sup>

<sup>a</sup>Department of Chemistry, University of Mysore, Mysuru, Karnataka, India.

Email: [mpsadashiva@gmail.com](mailto:mpsadashiva@gmail.com), [rangappaks@yahoo.com](mailto:rangappaks@yahoo.com)

<sup>b</sup>Manipal College of Pharmaceutical Sciences, Manipal University, Madhav Nagar, Manipal.

<sup>c</sup>Department of Biochemistry and Molecular Biology, Pennsylvania State UniversityCollege of Medicine, Hershey, PA 17033, USA. E-mail: [gowda@psu.edu](mailto:gowda@psu.edu).

#### LIST OF CONTENTS

| Serial number | Content                                                                          | Page number |
|---------------|----------------------------------------------------------------------------------|-------------|
| Table S1      | Docking results of dibenzazepine derivatives with PfA-M1                         | 1           |
| Figure S1     | ORTEP diagrammatic representation of the crystal structure of compound <b>6d</b> | 2           |
| Figure S2     | <sup>1</sup> H and <sup>13</sup> C NMR spectra of compound <b>2</b>              | 3           |
| Figure S3     | Mass, <sup>1</sup> H and <sup>13</sup> C NMR spectra of compound <b>6a</b>       | 4           |
| Figure S4     | Mass, <sup>1</sup> H and <sup>13</sup> C NMR spectra of compound <b>6b</b>       | 6           |
| Figure S5     | Mass, <sup>1</sup> H and <sup>13</sup> C NMR spectra of compound <b>6c</b>       | 8           |
| Figure S6     | Mass, <sup>1</sup> H and <sup>13</sup> C NMR spectra of compound <b>6d</b>       | 10          |
| Figure S7     | Mass, <sup>1</sup> H and <sup>13</sup> C NMR spectra of compound <b>6e</b>       | 13          |
| Figure S8     | Mass, <sup>1</sup> H and <sup>13</sup> C NMR spectra of compound <b>6f</b>       | 15          |
| Figure S9     | Mass, <sup>1</sup> H and <sup>13</sup> C NMR spectra of compound <b>6g</b>       | 17          |
| Figure S10    | Mass, <sup>1</sup> H and <sup>13</sup> C NMR spectra of compound <b>6h</b>       | 20          |
| Figure S11    | Mass, <sup>1</sup> H and <sup>13</sup> C NMR spectra of compound <b>6i</b>       | 22          |
| Figure S12    | Mass, <sup>1</sup> H and <sup>13</sup> C NMR spectra of compound <b>6j</b>       | 24          |
| Figure S13    | Mass, <sup>1</sup> H and <sup>13</sup> C NMR spectra of compound <b>6k</b>       | 27          |
| Figure S14    | Mass, <sup>1</sup> H and <sup>13</sup> C NMR spectra of compound <b>8a</b>       | 31          |
| Figure S15    | Mass, <sup>1</sup> H and <sup>13</sup> C NMR spectra of compound <b>8b</b>       | 34          |
| Figure S16    | Mass, <sup>1</sup> H and <sup>13</sup> C NMR spectra of compound <b>8c</b>       | 38          |
| Figure S17    | Mass, <sup>1</sup> H and <sup>13</sup> C NMR spectra of compound <b>8d</b>       | 40          |
| Figure S18    | Mass, <sup>1</sup> H and <sup>13</sup> C NMR spectra of compound <b>8e</b>       | 44          |
| Figure S19    | Mass, <sup>1</sup> H and <sup>13</sup> C NMR spectra of compound <b>8f</b>       | 48          |
| Figure S20    | Mass, <sup>1</sup> H and <sup>13</sup> C NMR spectra of compound <b>8g</b>       | 51          |
| Figure S21    | Mass, <sup>1</sup> H and <sup>13</sup> C NMR spectra of compound <b>8h</b>       | 54          |
| Figure S22    | Mass, <sup>1</sup> H and <sup>13</sup> C NMR spectra of compound <b>8i</b>       | 57          |
| Figure S23    | Mass, <sup>1</sup> H and <sup>13</sup> C NMR spectra of compound <b>8j</b>       | 60          |
| Figure S24    | Mass, <sup>1</sup> H and <sup>13</sup> C NMR spectra of compound <b>8k</b>       | 64          |
| Figure S25    | Mass, <sup>1</sup> H and <sup>13</sup> C NMR spectra of compound <b>8l</b>       | 68          |

**Table S1** Docking results of dibenzazepine derivatives with PfA-M1

| Compound  | Docking score (kcal/mol) |
|-----------|--------------------------|
| <b>6a</b> | -5.37                    |
| <b>6b</b> | -4.17                    |
| <b>6c</b> | -5.93                    |
| <b>6d</b> | -6.68                    |
| <b>6e</b> | -5.48                    |
| <b>6f</b> | -5.72                    |
| <b>6g</b> | -6.20                    |
| <b>6h</b> | -3.75                    |
| <b>6i</b> | -6.29                    |
| <b>6j</b> | -8.06                    |
| <b>6k</b> | -7.90                    |
| <b>8a</b> | -6.16                    |
| <b>8b</b> | -5.98                    |
| <b>8c</b> | -7.40                    |
| <b>8d</b> | -7.04                    |
| <b>8e</b> | -6.16                    |
| <b>8f</b> | -6.88                    |
| <b>8g</b> | -6.09                    |
| <b>8h</b> | -5.36                    |
| <b>8i</b> | -3.61                    |
| <b>8j</b> | -6.99                    |
| <b>8k</b> | -7.80                    |

**Figure S1** ORTEP diagrammatic representation of the crystal structure of compound **6d**

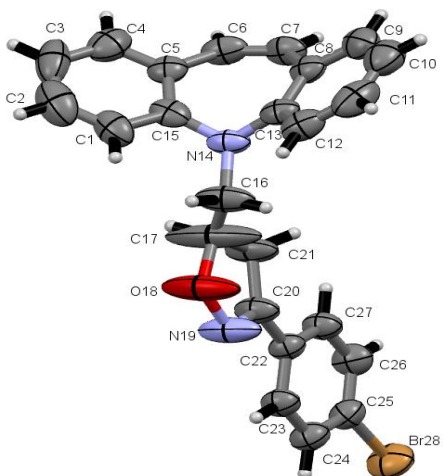

The compound **6d** crystallizes in monoclinic space group  $P2_1/c$ . The lattice parameters are,  $a=18.750(2)$  Å,  $b=6.8019(9)$  Å,  $c=15.436(2)$  Å and  $\beta=94.233(7)^\circ$ . The final residual value,  $R1$  is 0.0845. The packing of the molecule is stabilized with the C-H... $\pi$  and C-Br... $\pi$  short contacts. The short bond lengths  $N14-C13 = 1.438(9)$  Å and  $N14-C15 = 1.422(9)$  Å indicate  $\pi$ -electron delocalization in the ring. As a result there is a difference in the bond length of  $C5-C6 = 1.459(9)$  Å and  $C7-C8 = 1.440(9)$  Å.

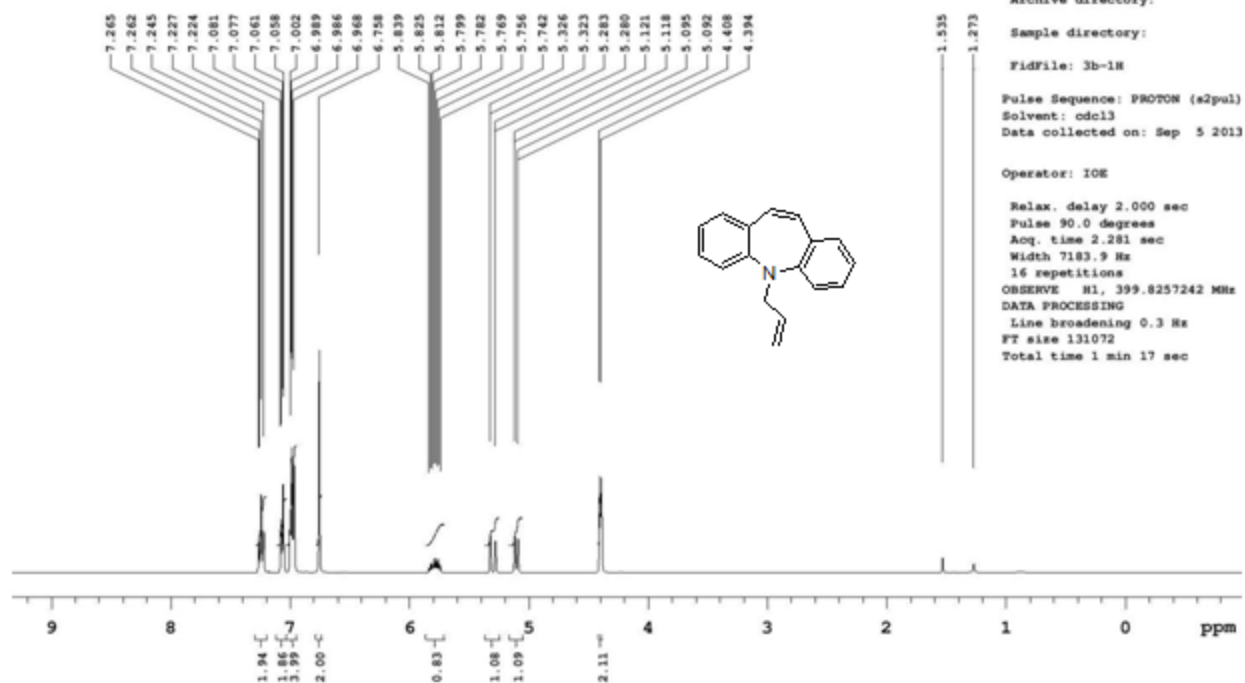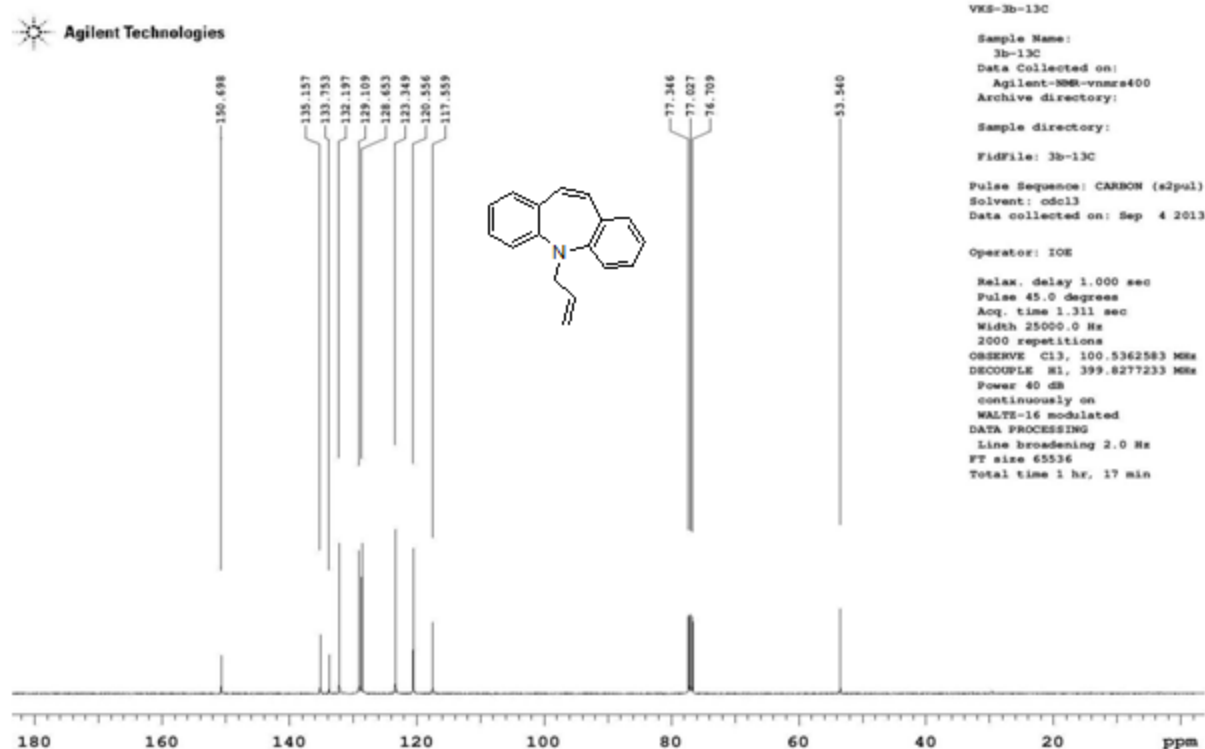

Figure S2  $^1\text{H}$  and  $^{13}\text{C}$  NMR spectra of 5-(prop-2-yn-1-yl)-5H-dibenzo[b,f]azepine2



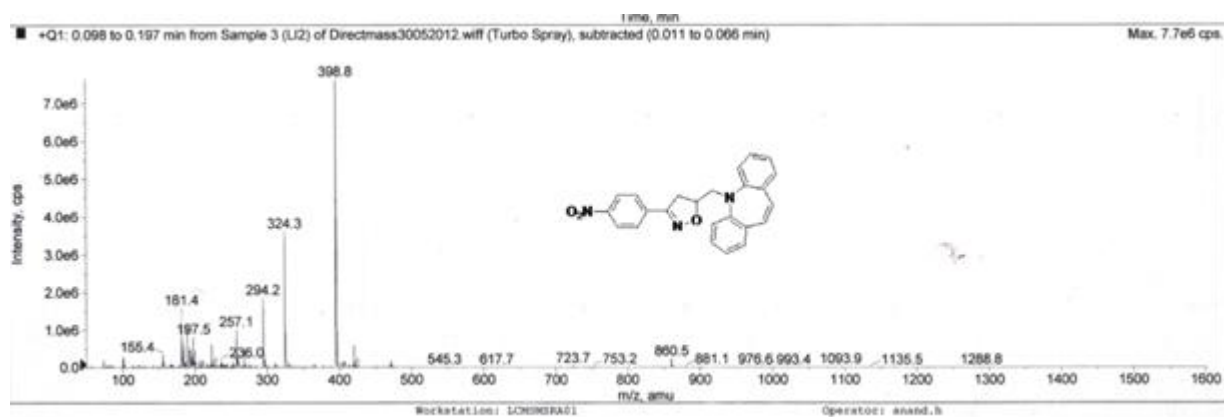

UNIVERSITY OF MYSORE

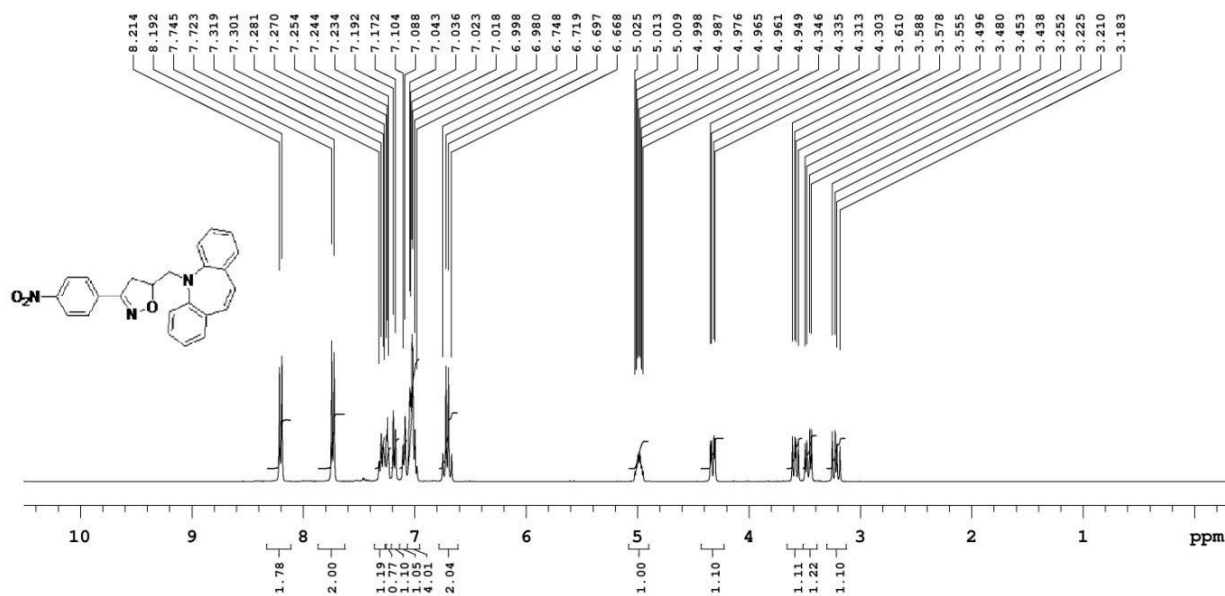

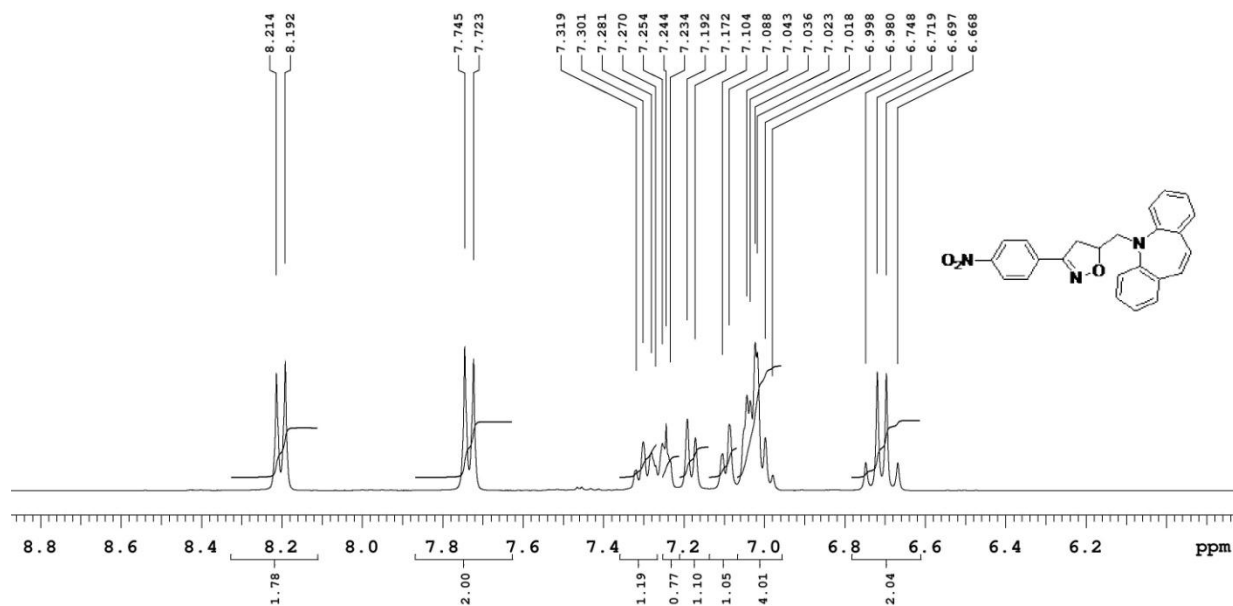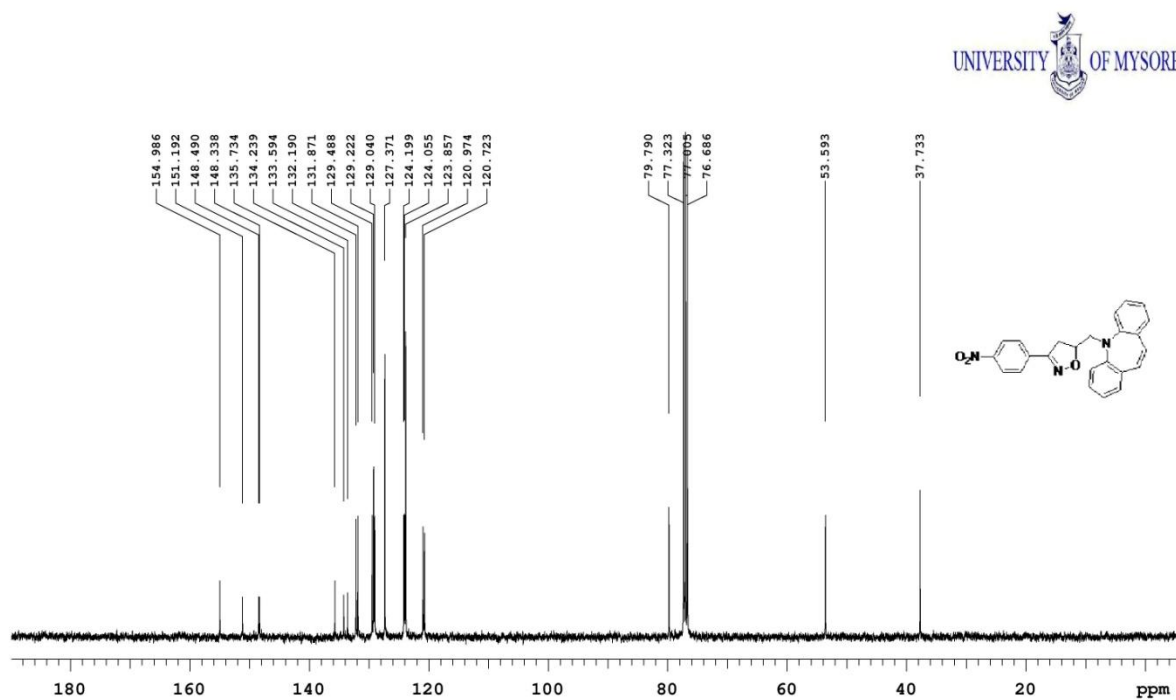

**Figure S3** MASS, <sup>1</sup>H and <sup>13</sup>C NMR spectra of compound 6a

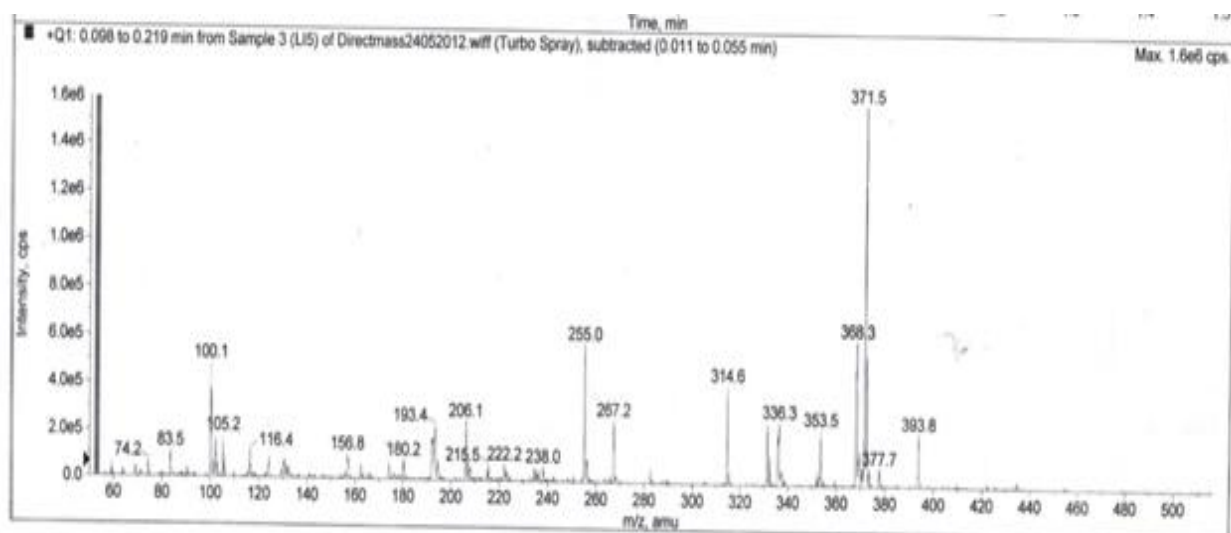

Data collected on:  
 Varian-NMR-vnmr400  
 Archive directory:  
 Sample directory:  
 Fidfile: PROTON

Pulse Sequence: PROTON (a2pul)  
 Solvent: cdcl3  
 Data collected on: May 21 2012

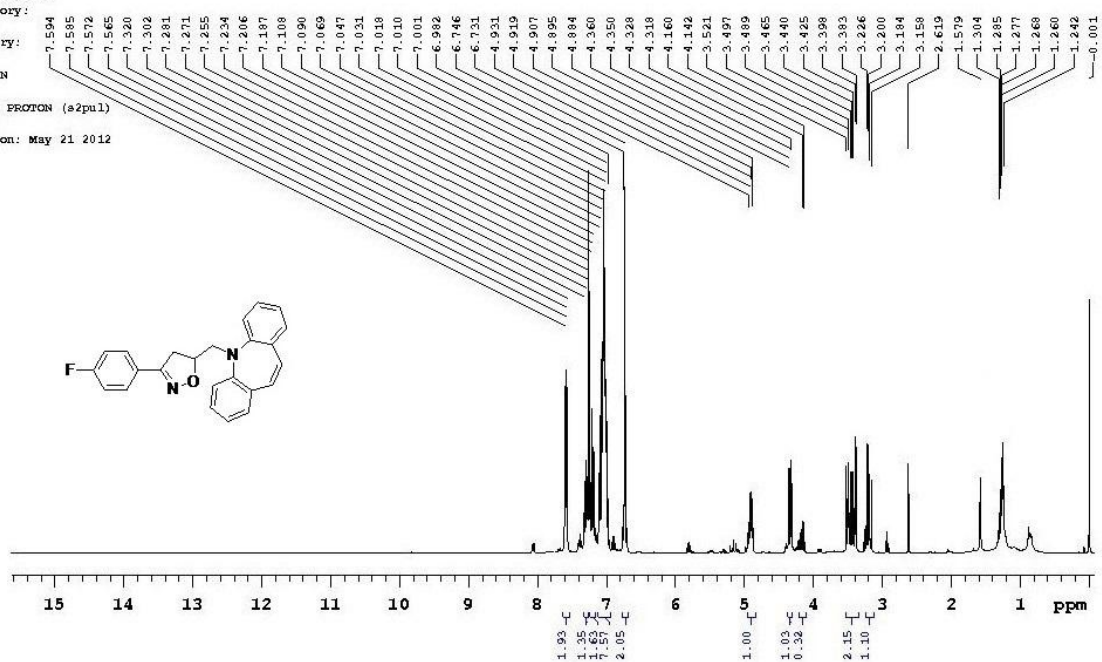

Varian-NMR-vnmr400  
 Archive directory:  
 Sample directory:  
 Fidfile: PROTON  
 Pulse Sequence: PROTON (s2pul)  
 Solvent: cdcl3  
 Data collected on: May 21 2012

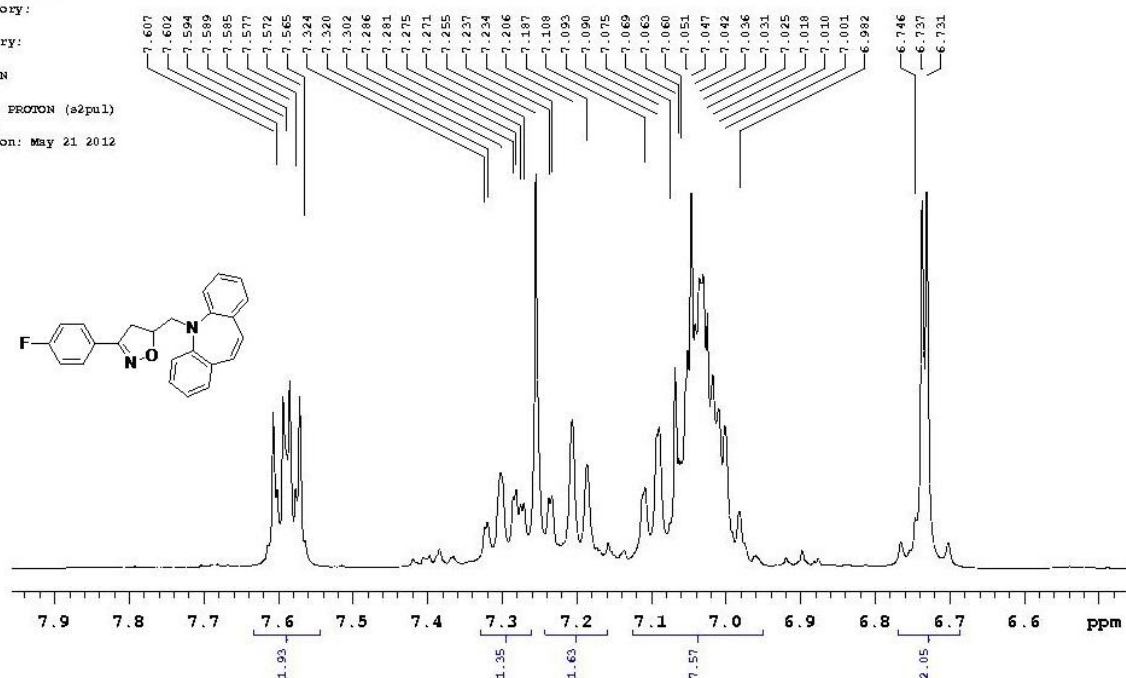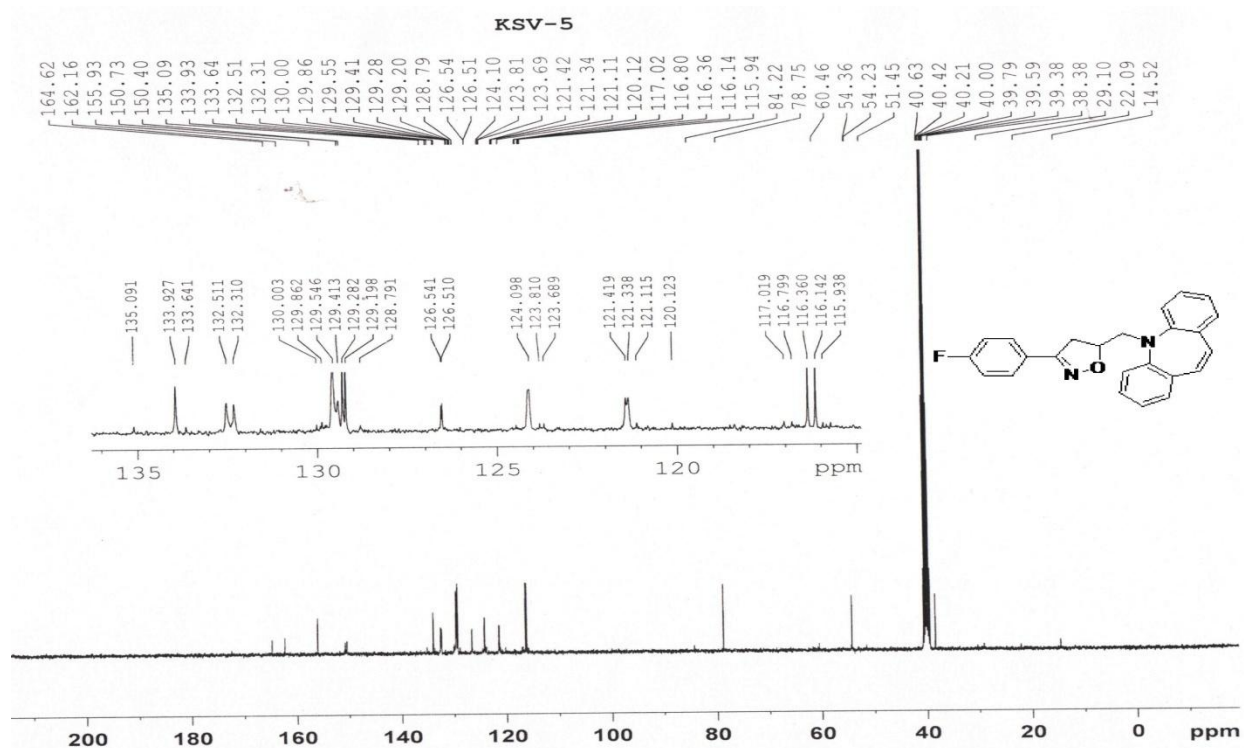

**Figure S4** MASS, <sup>1</sup>H and <sup>13</sup>C NMR spectra of compound 6b







1  
14000562-VT3

TOF MS ES+  
TIC  
4.58e6

| Time | Height  | Area      | Area% |
|------|---------|-----------|-------|
| 1.38 | 290690  | 11480.75  | 2.54  |
| 1.71 | 188838  | 6288.40   | 1.39  |
| 1.86 | 4269177 | 293347.53 | 65.01 |
| 2.27 | 791564  | 39161.41  | 8.68  |
| 3.12 | 1824530 | 62382.94  | 13.83 |
| 3.29 | 1057553 | 38547.64  | 8.54  |

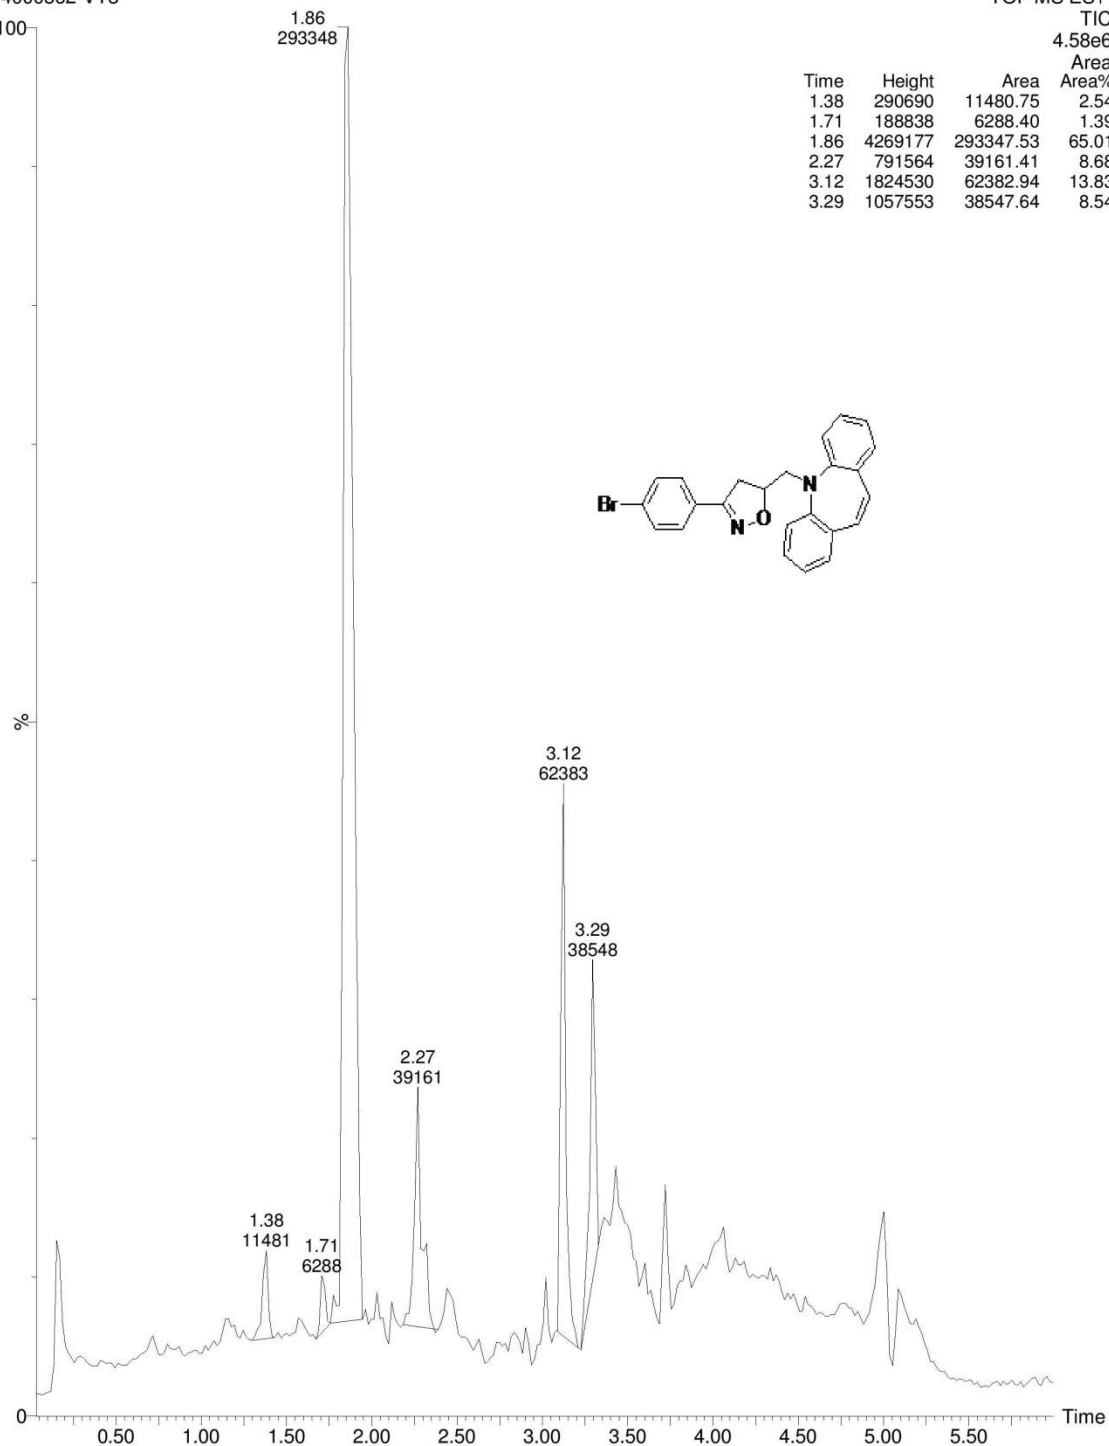

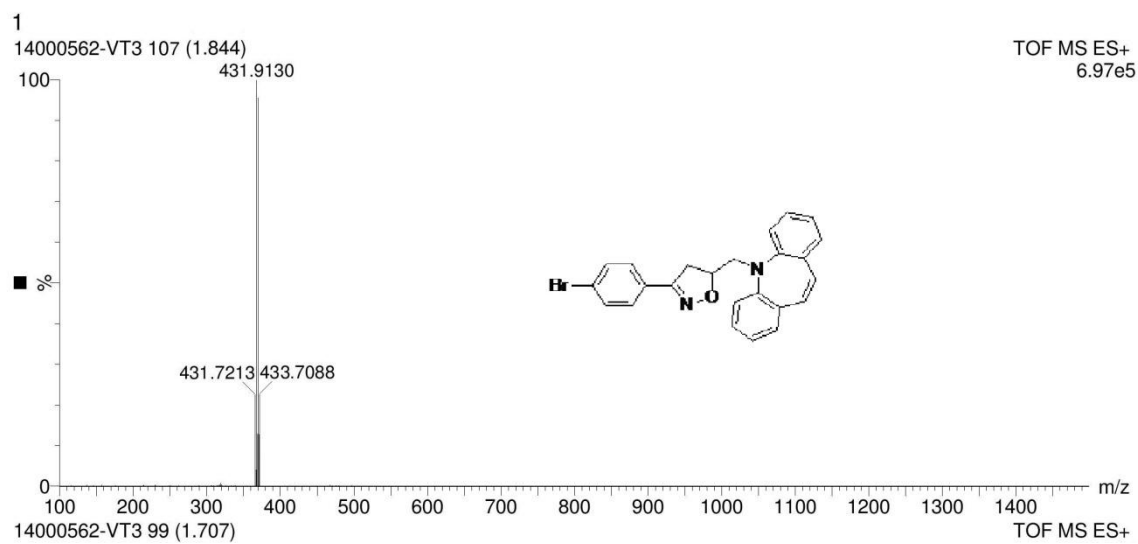

UNIVERSITY OF MYSORE

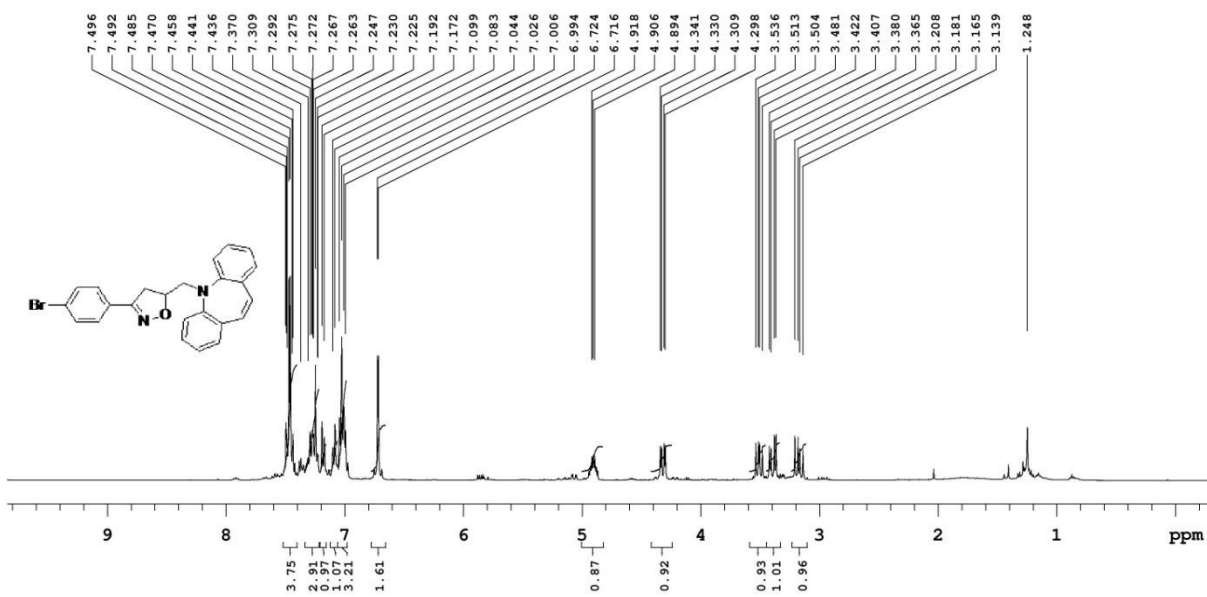



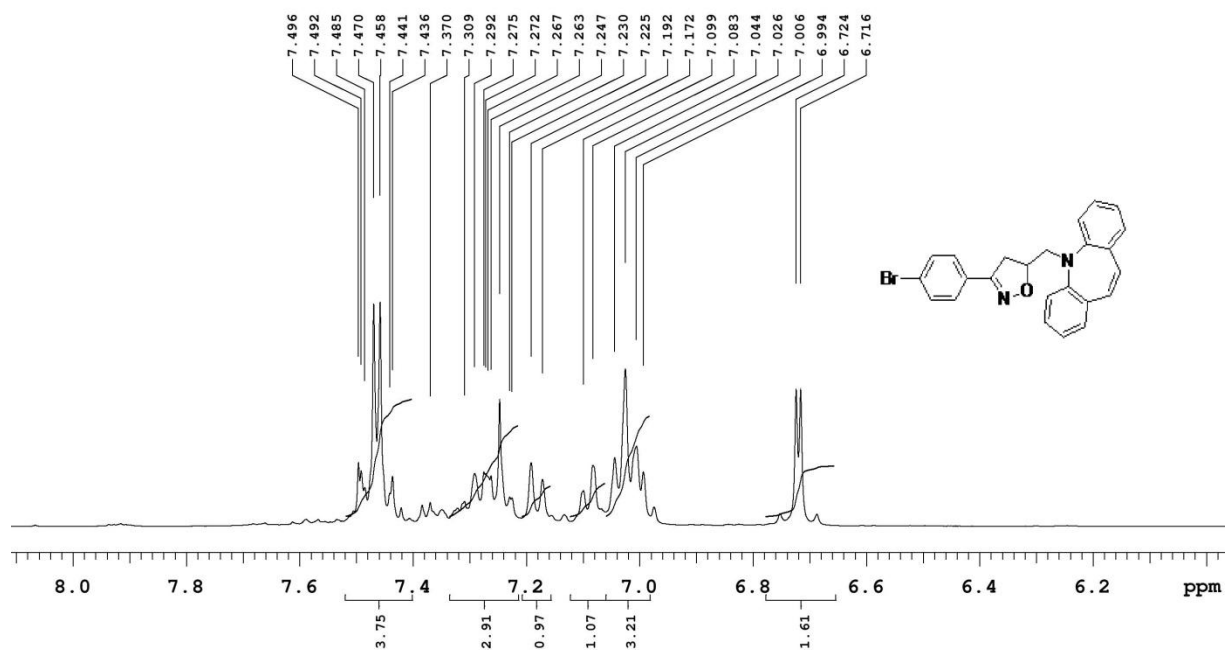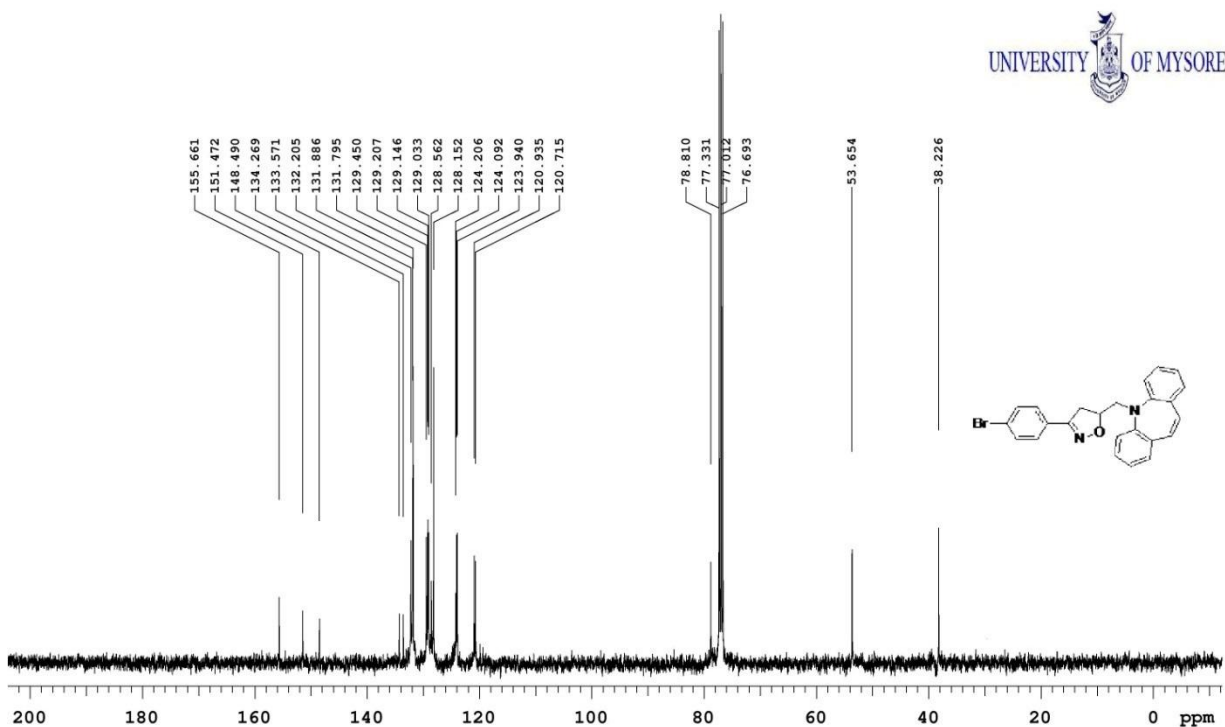

**Figure S6** MASS, <sup>1</sup>H and <sup>13</sup>C NMR spectra of compound **6d**

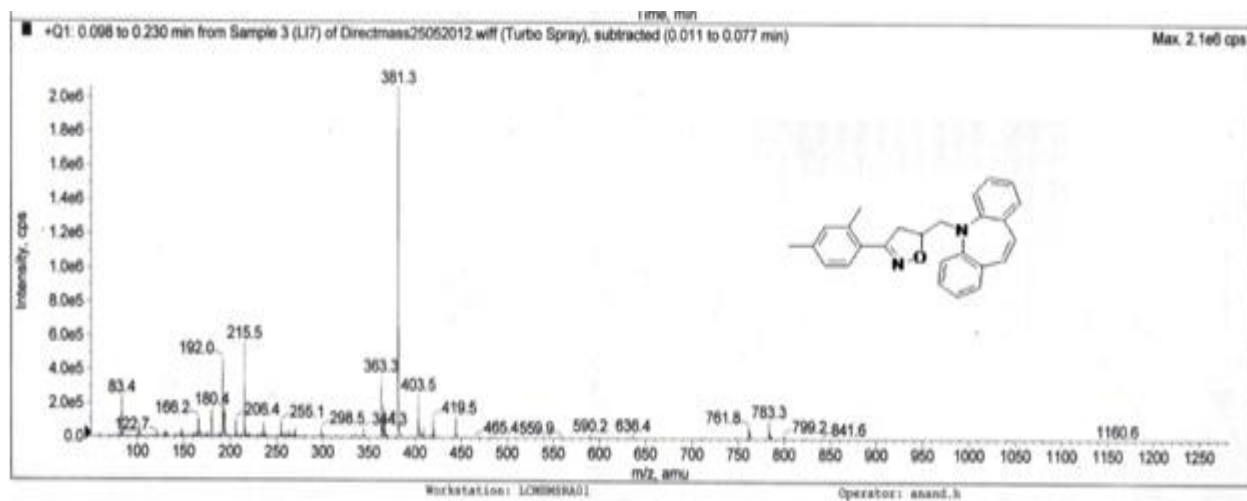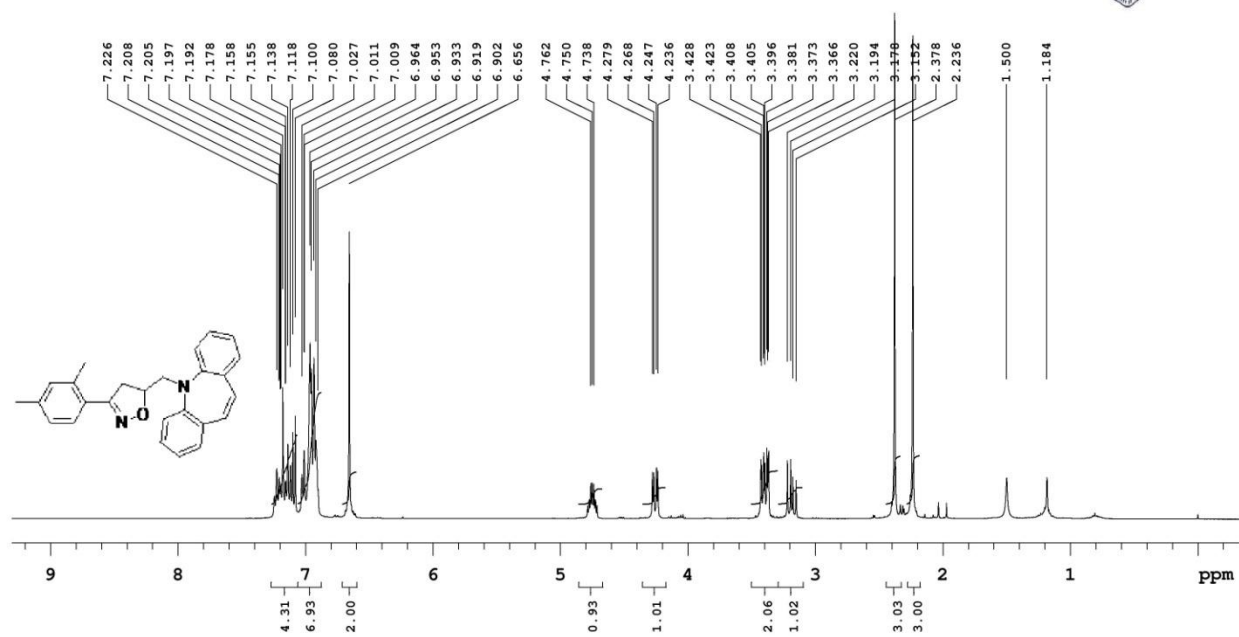

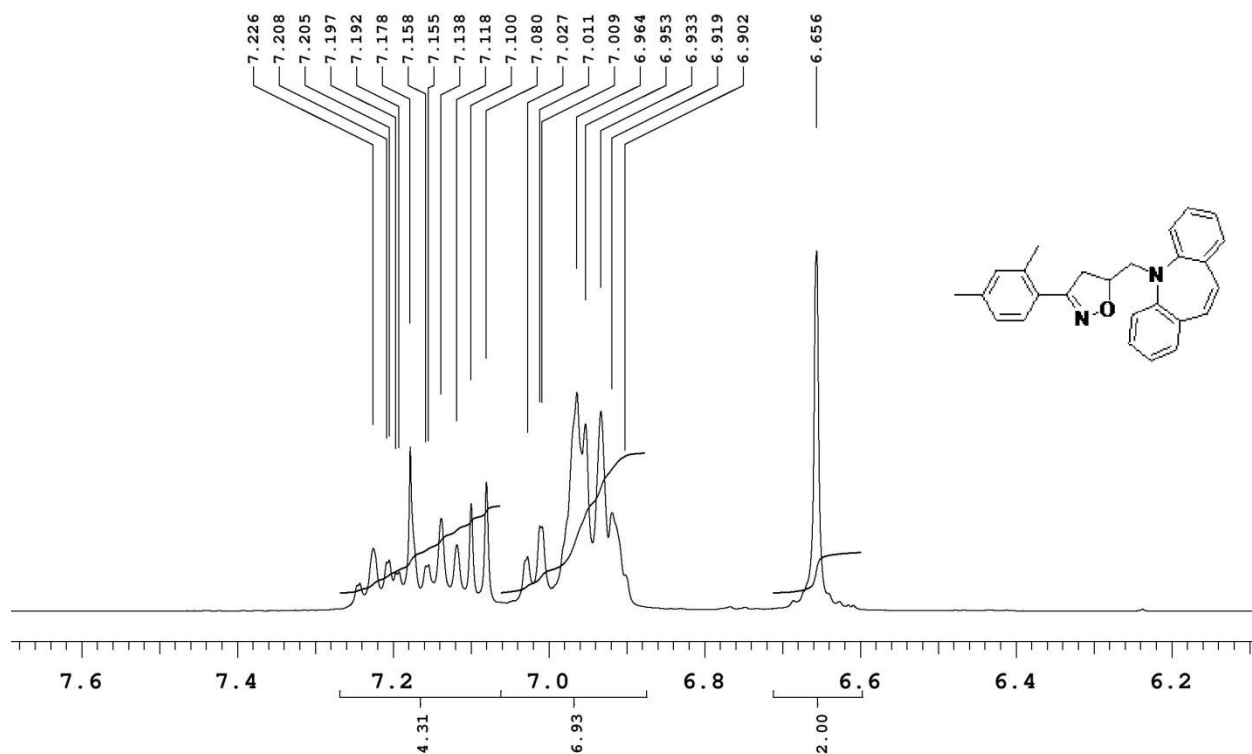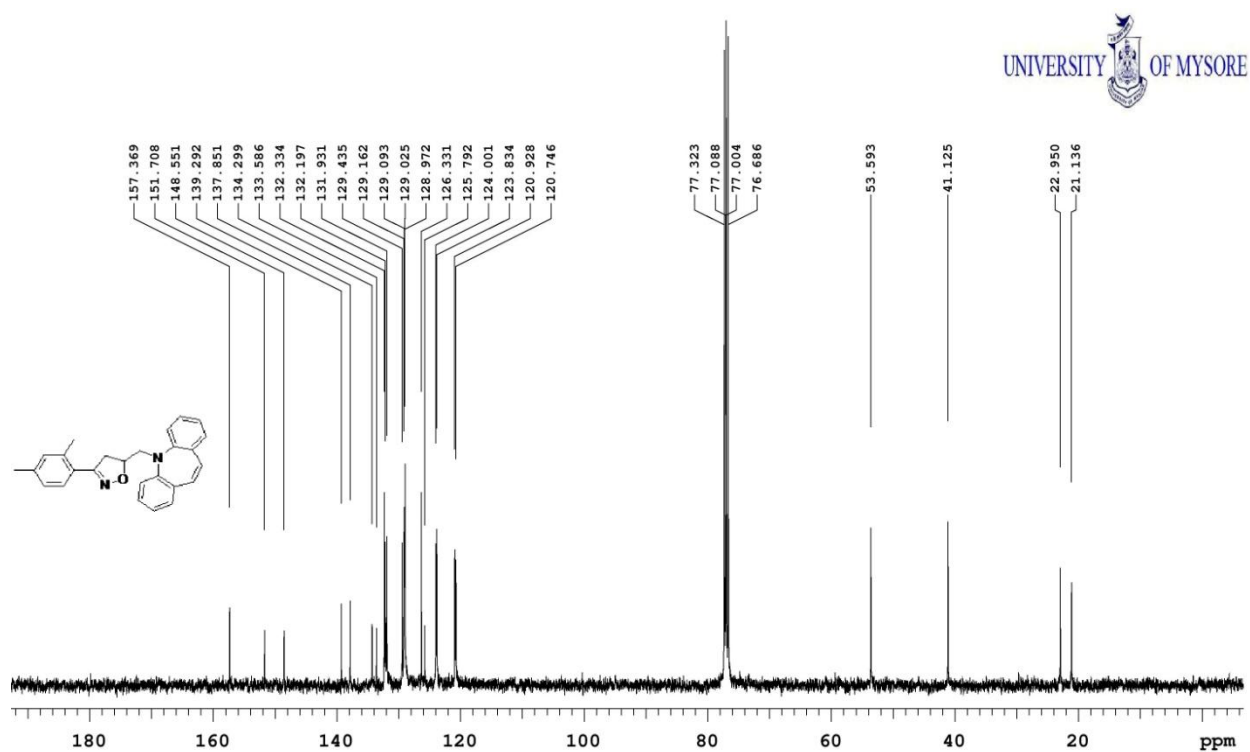

**Figure S7** MASS, <sup>1</sup>H and <sup>13</sup>C NMR spectra of compound **6e**

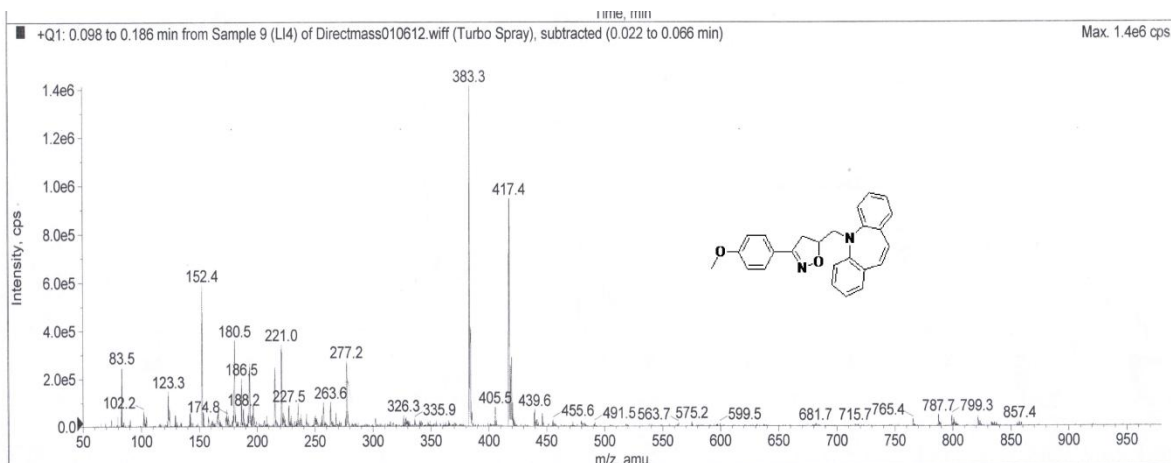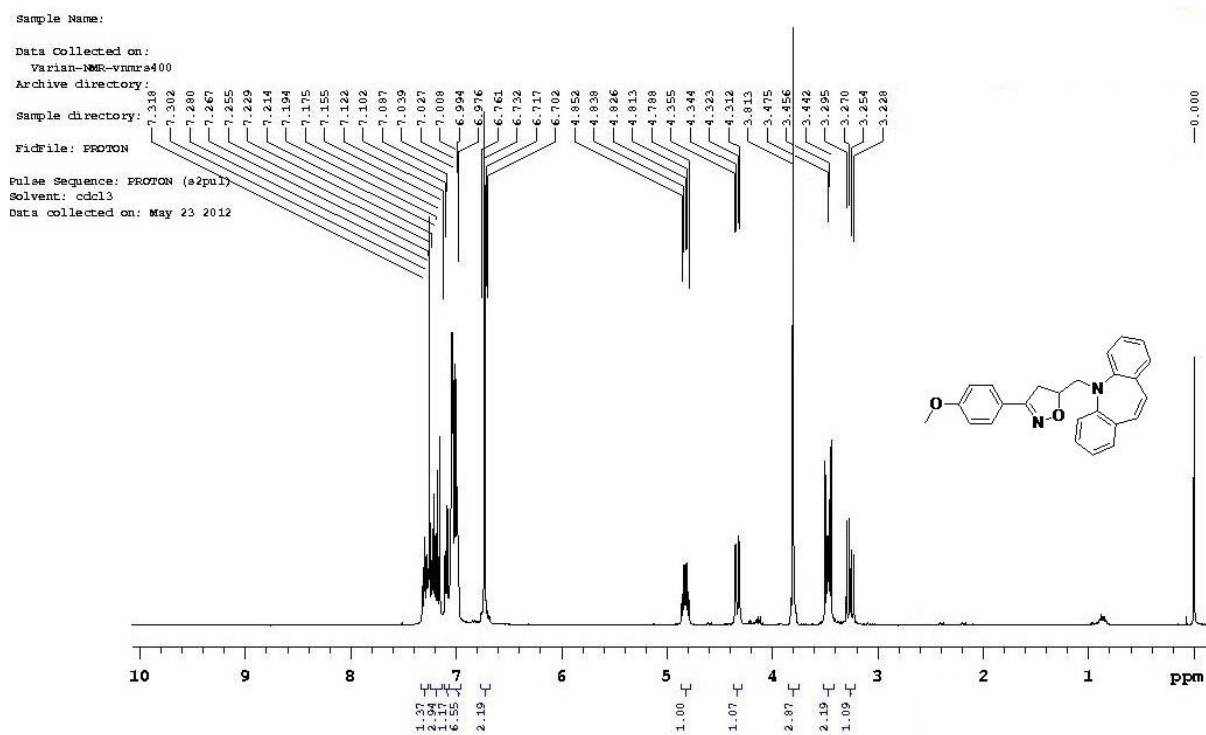

Varian-NMR-vnmrs400  
 Archive directory:  
 Sample directory:  
 Fidfile: PROTON  
 Pulse Sequence: PROTON (s2pul)  
 Solvent: cdcl3  
 Data collected on: May 23 2012

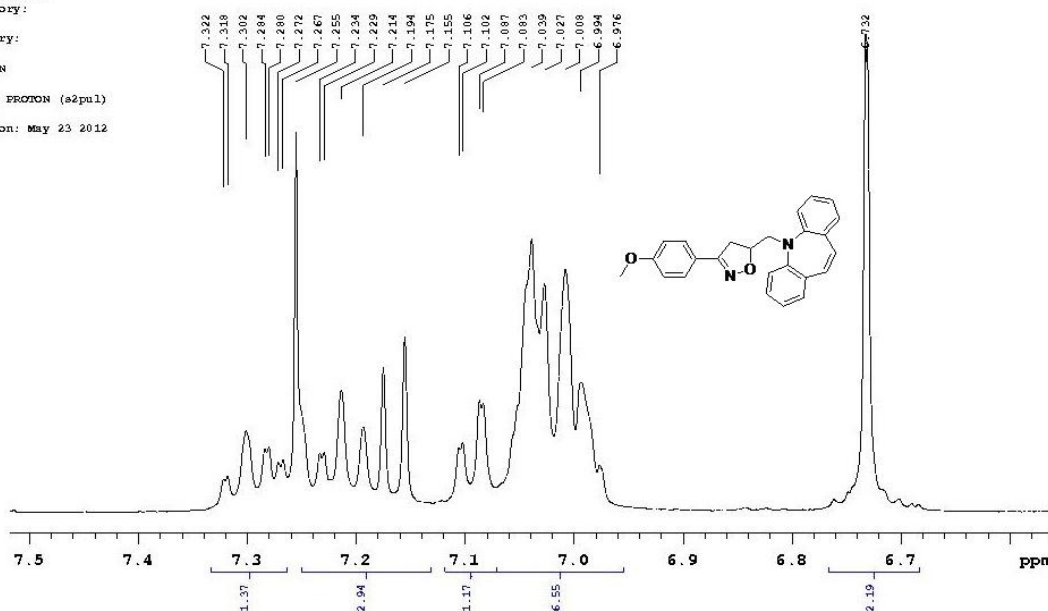

UNIVERSITY OF MYSORE

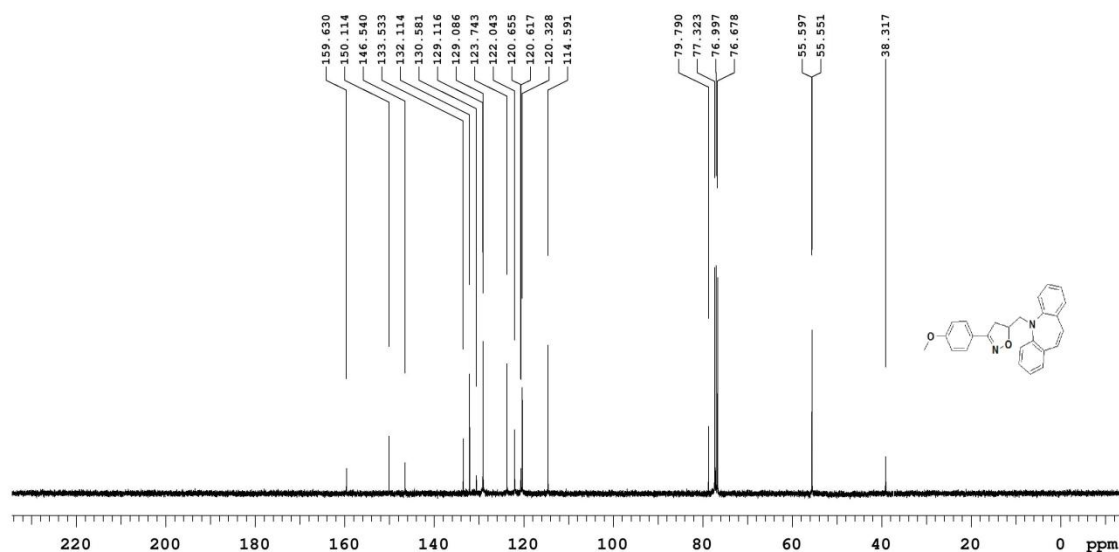

Figure S8 Mass,  $^1\text{H}$  and  $^{13}\text{C}$  NMR spectra of compound 6f

1  
14000459-VT-2

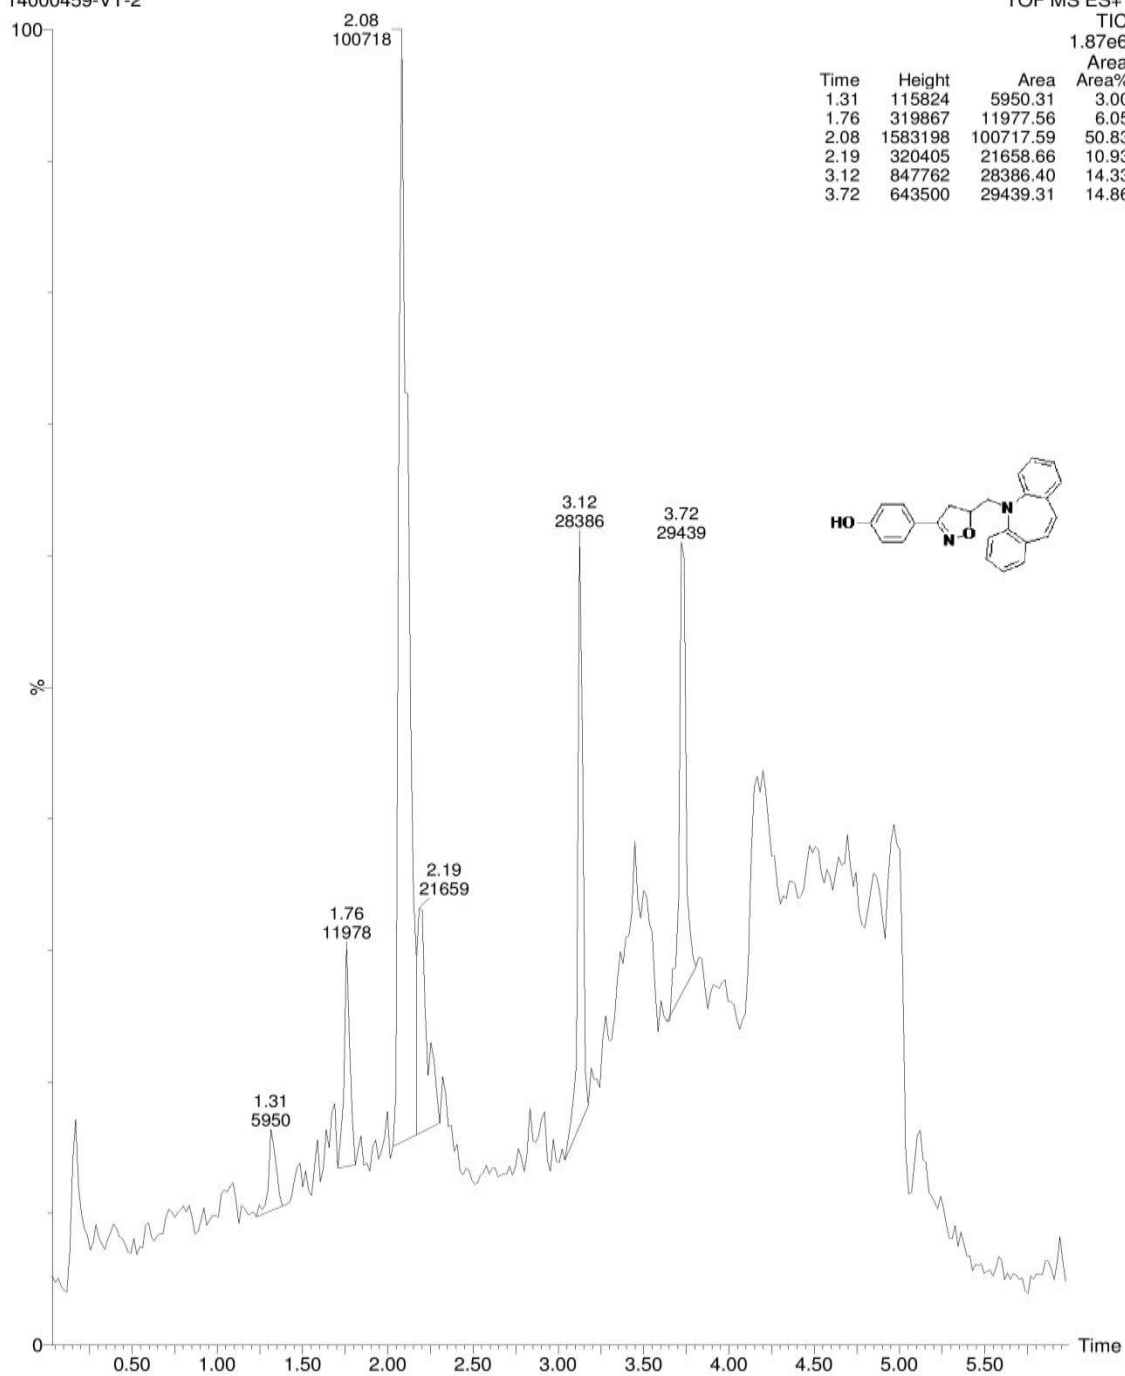

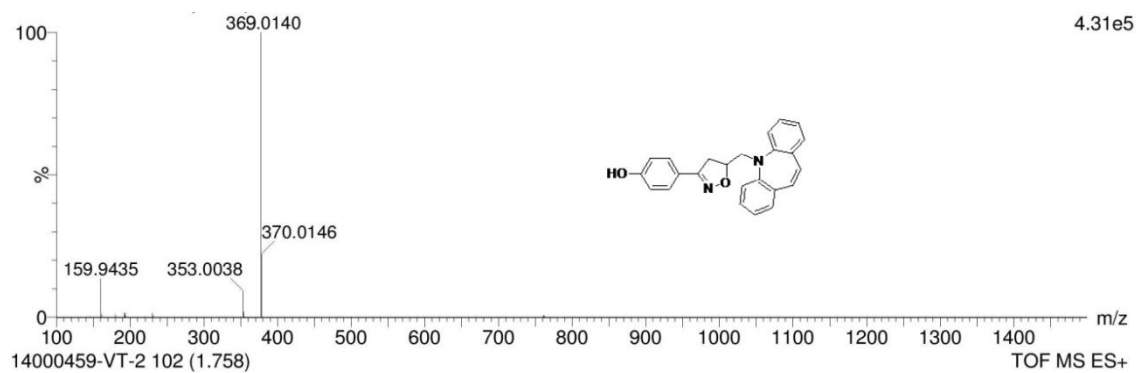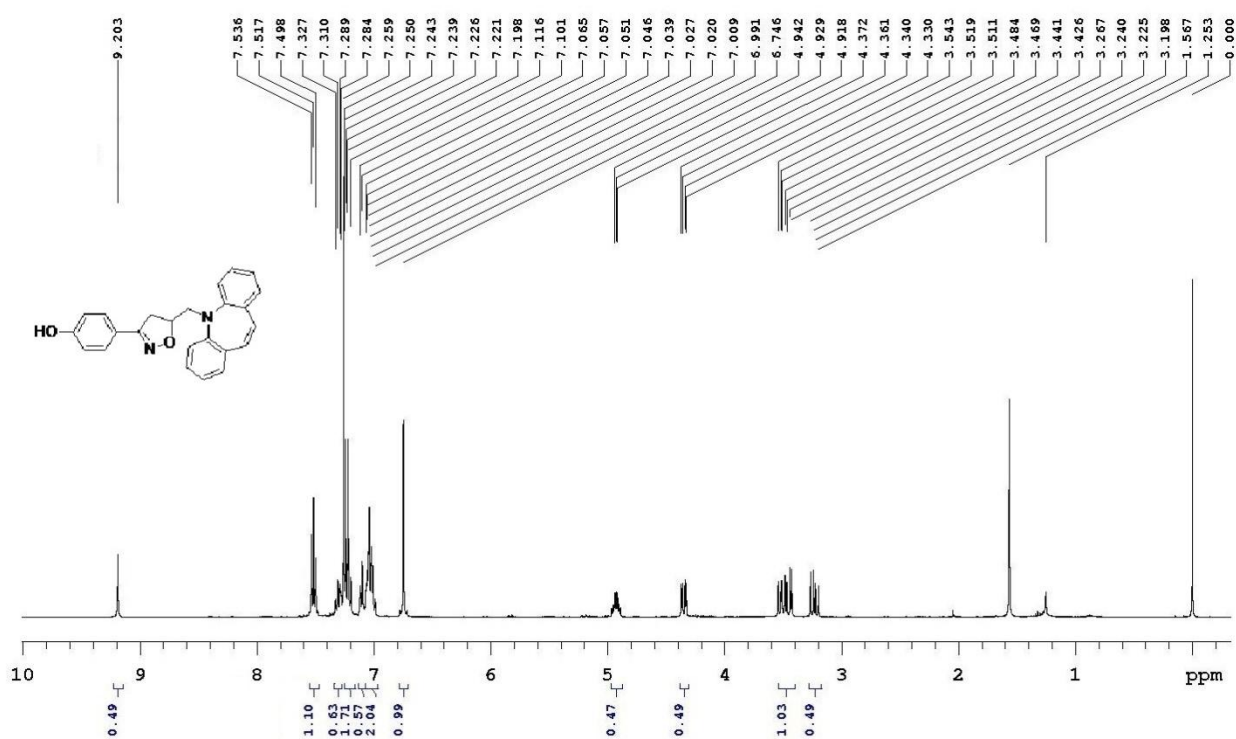

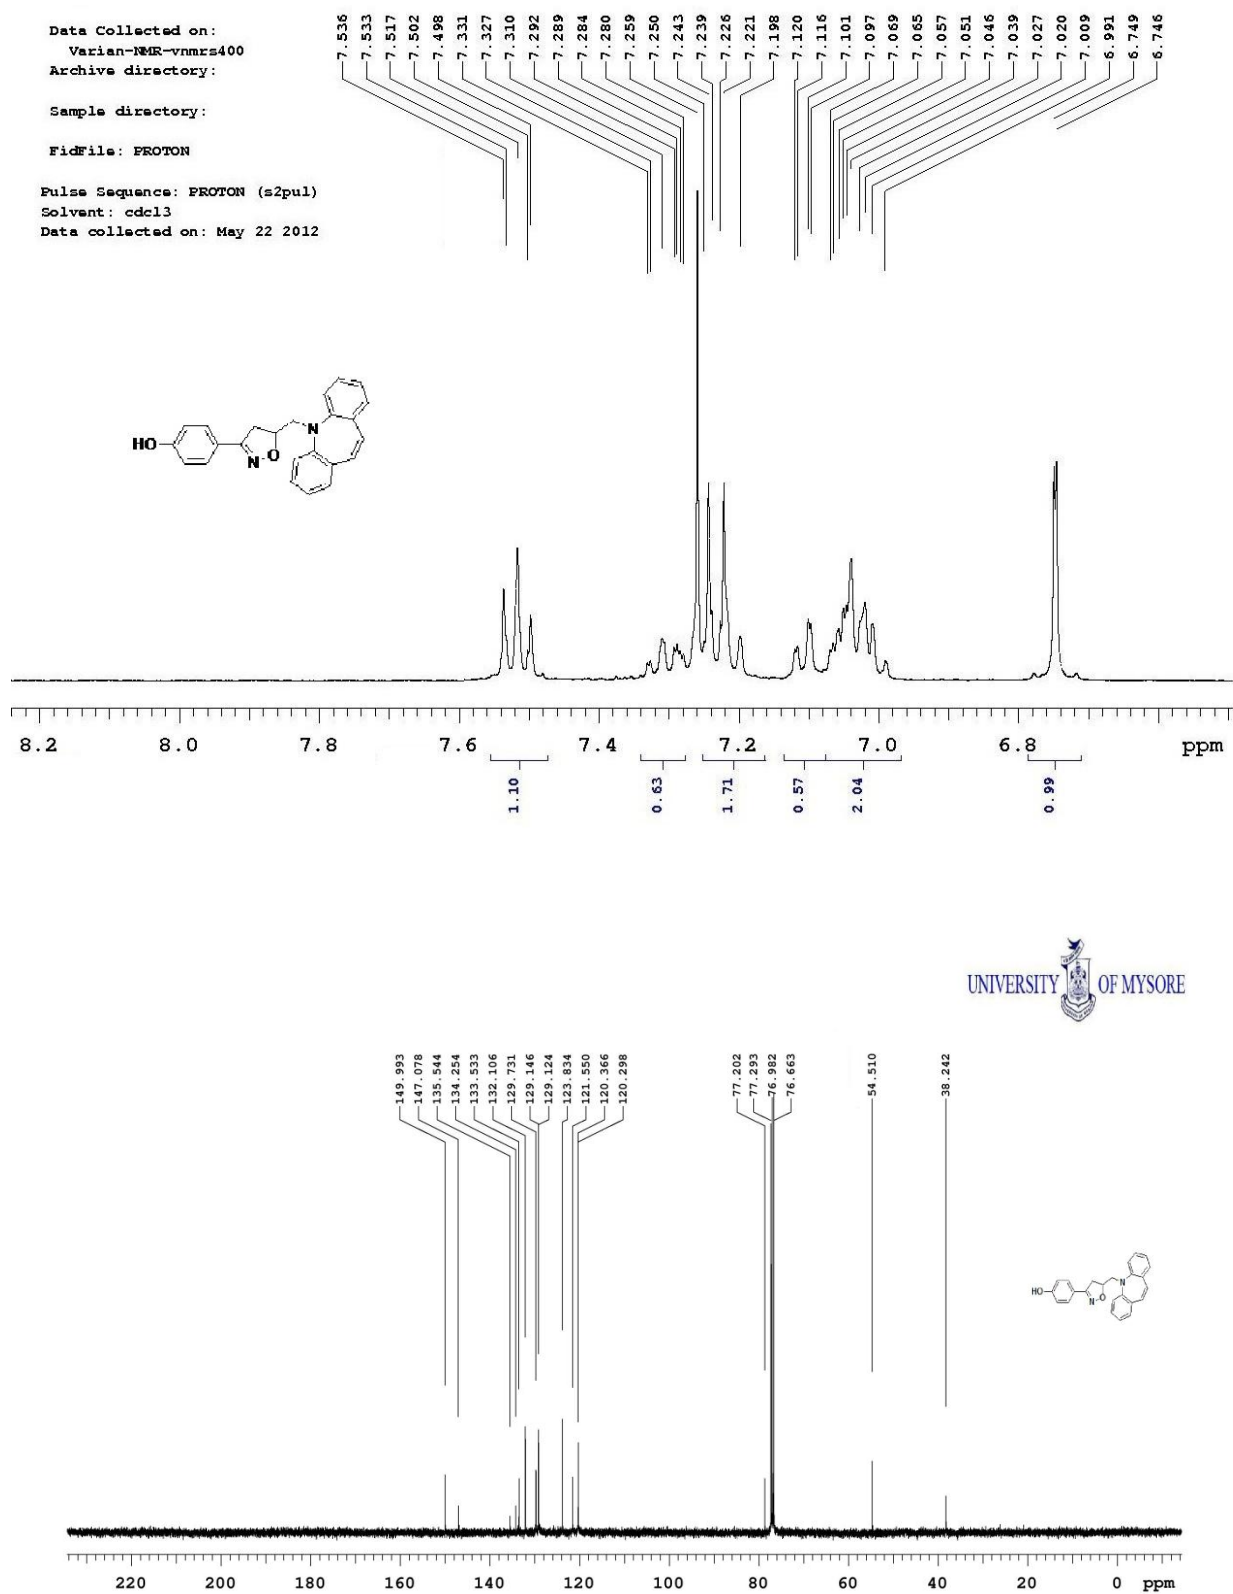

**Figure S9** Mass, <sup>1</sup>H and <sup>13</sup>C NMR spectra of compound 6g



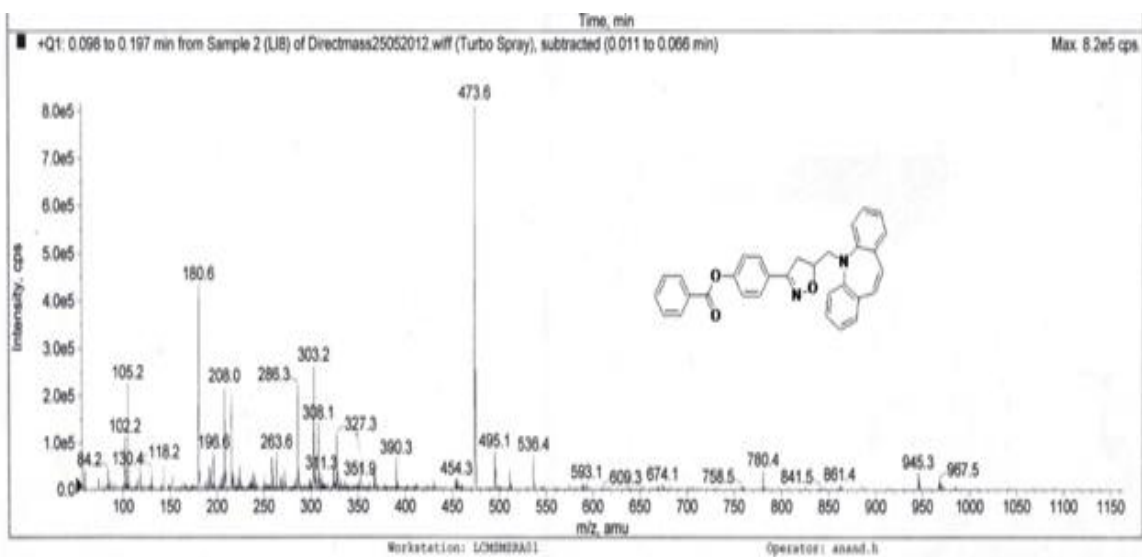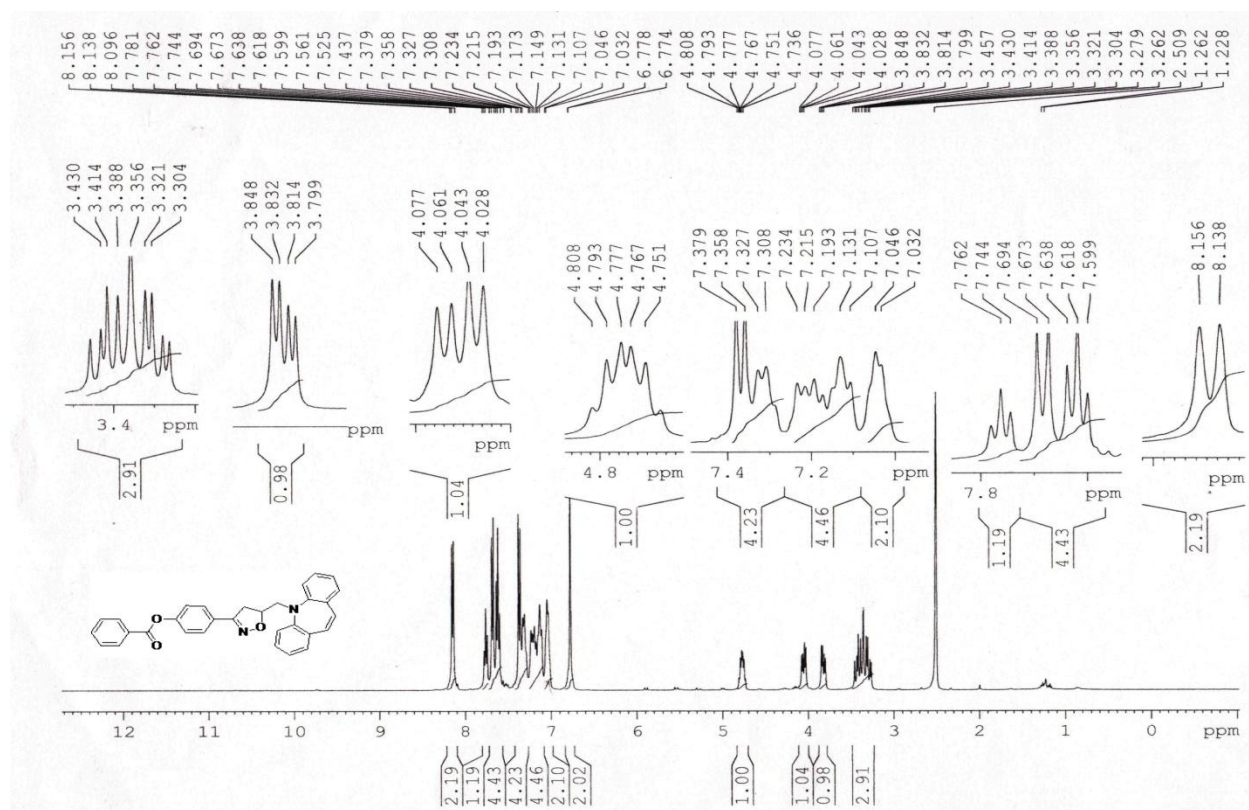

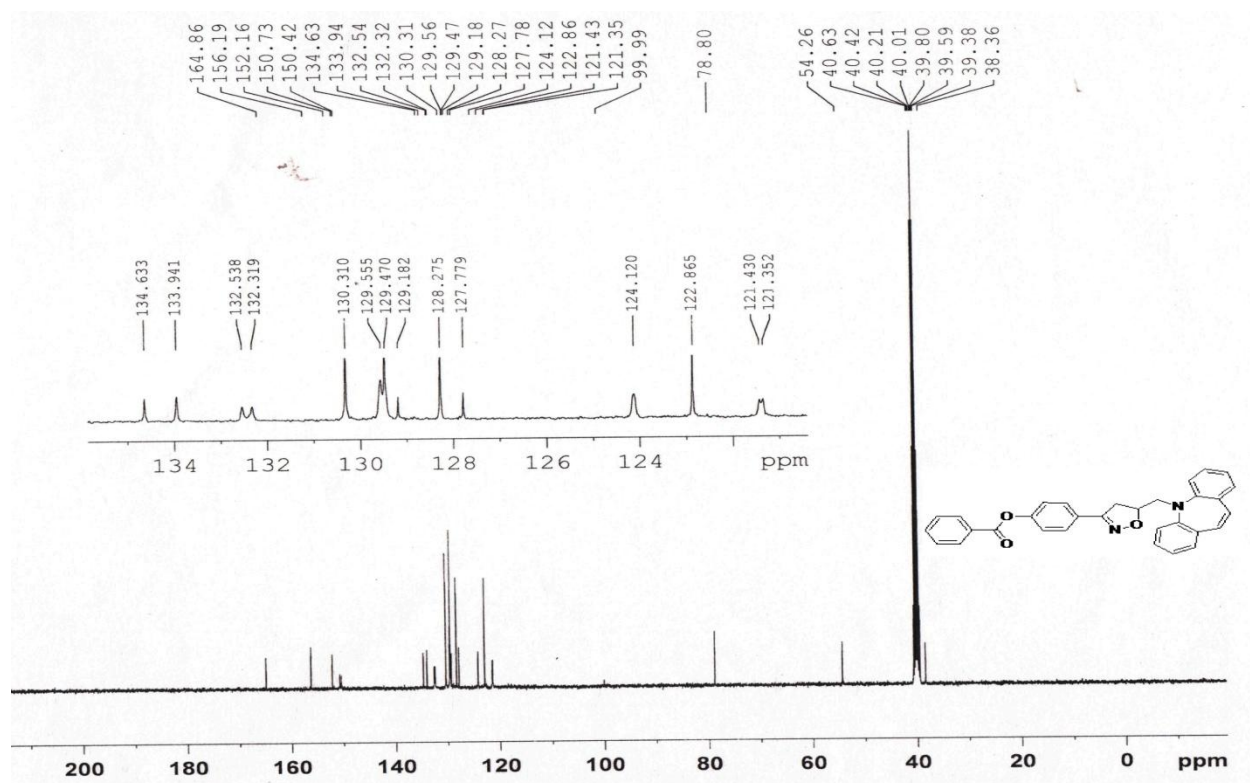

**Figure S10** Mass, <sup>1</sup>H and <sup>13</sup>C NMR spectra of compound **6h**

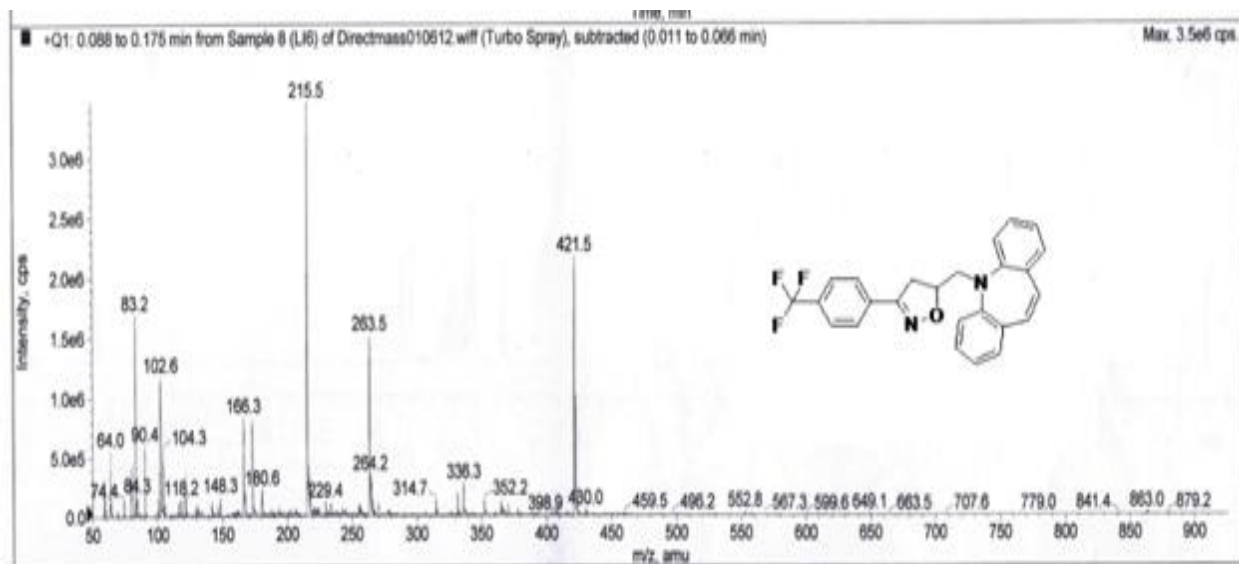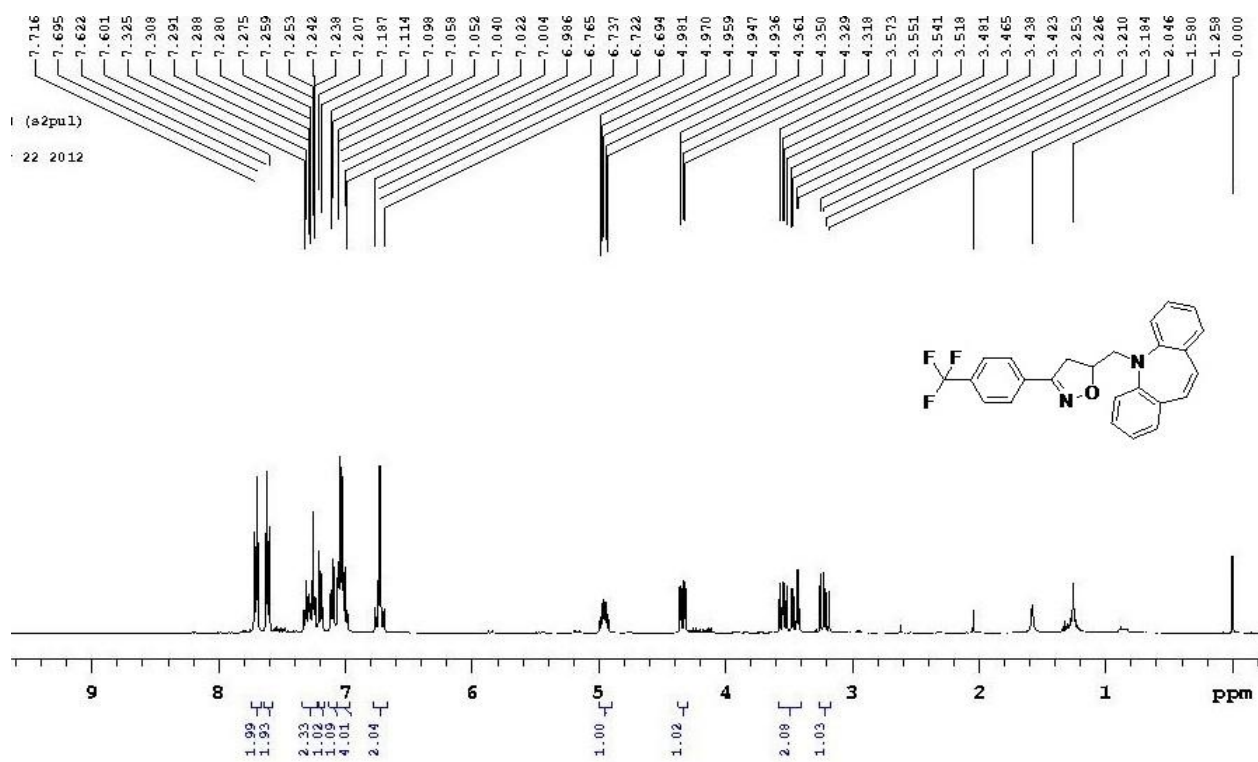

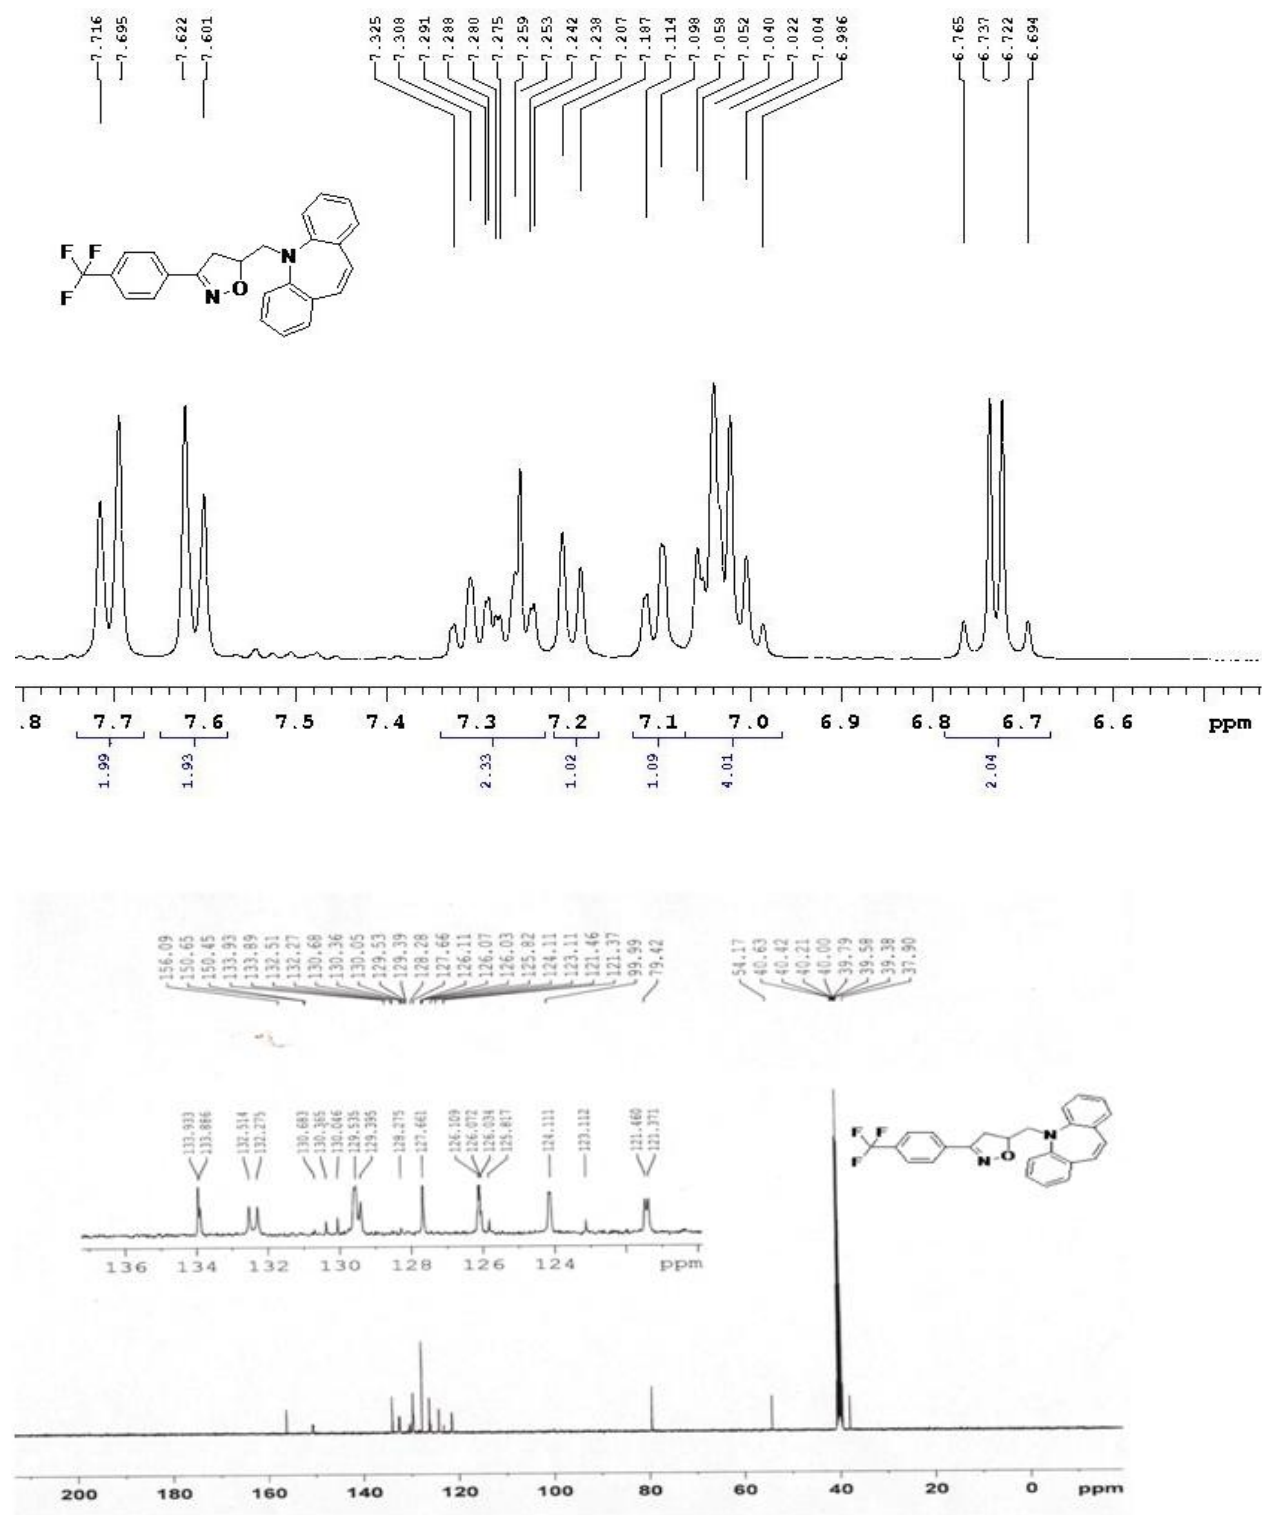

**Figure S11** Mass, <sup>1</sup>H and <sup>13</sup>C NMR spectra of compound 6i

1  
14000462-VT-5

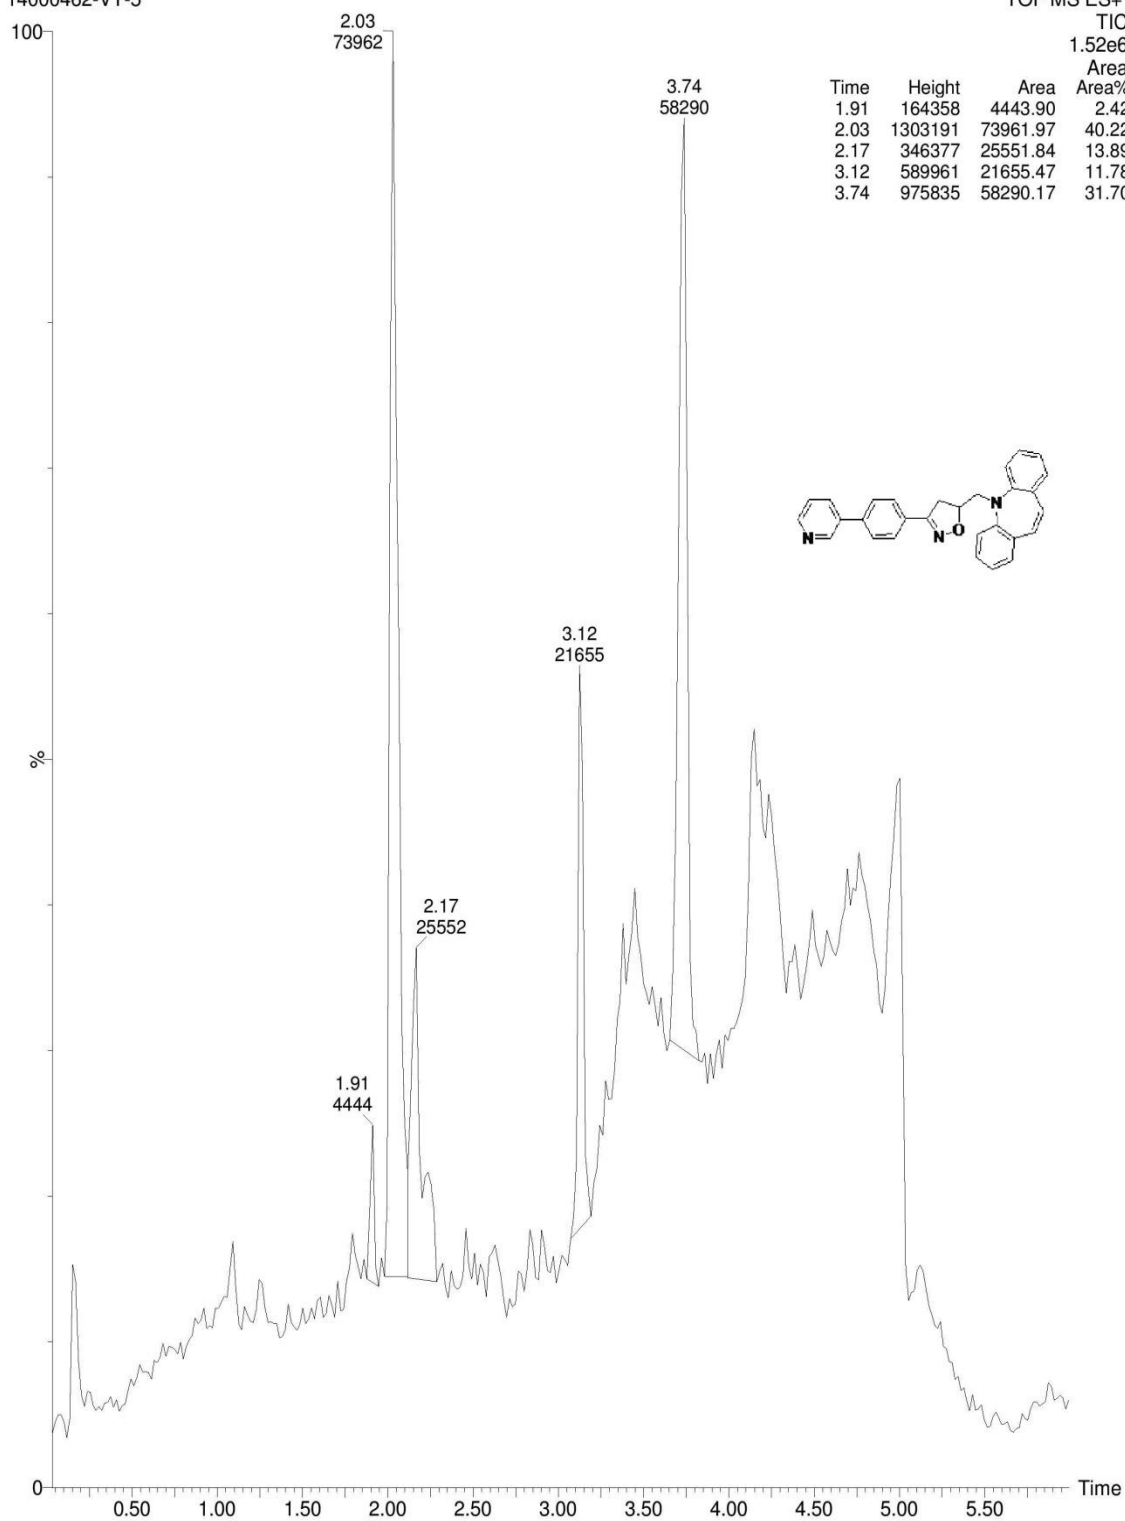

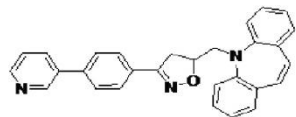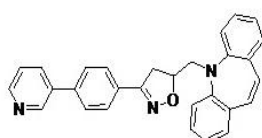

Data collected on:  
 Varian-NMR-vnmr400  
 Archive directory:

Sample directory:

Fidfile: PROTON

Pulse Sequence: PROTON (s2pul)  
 Solvent: cdcl3  
 Data collected on: May 23 2012

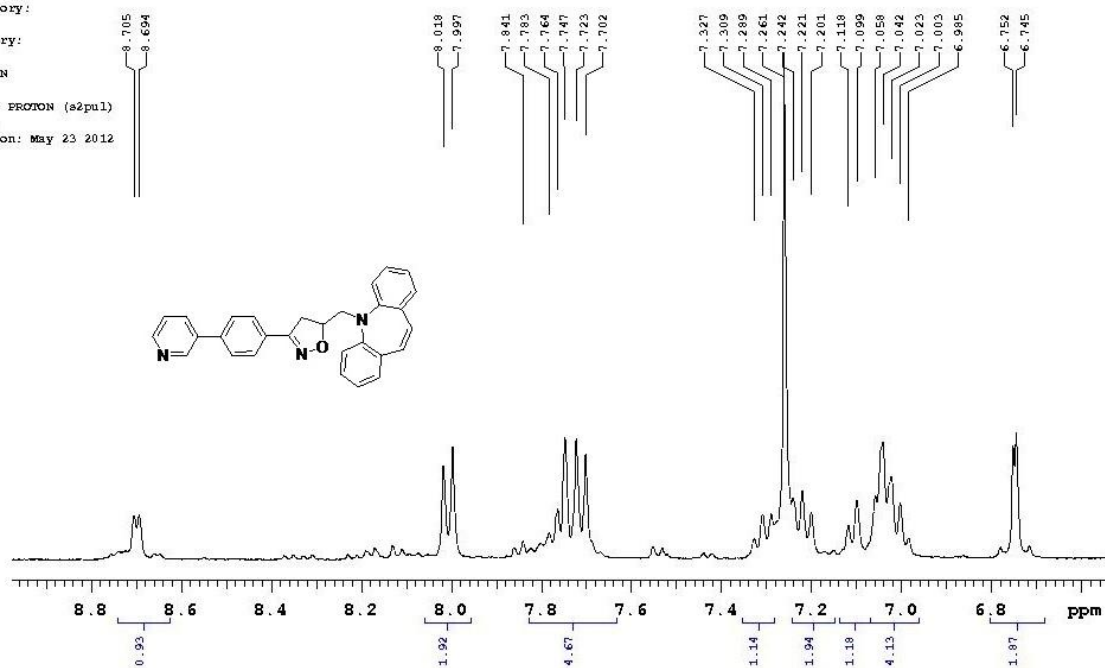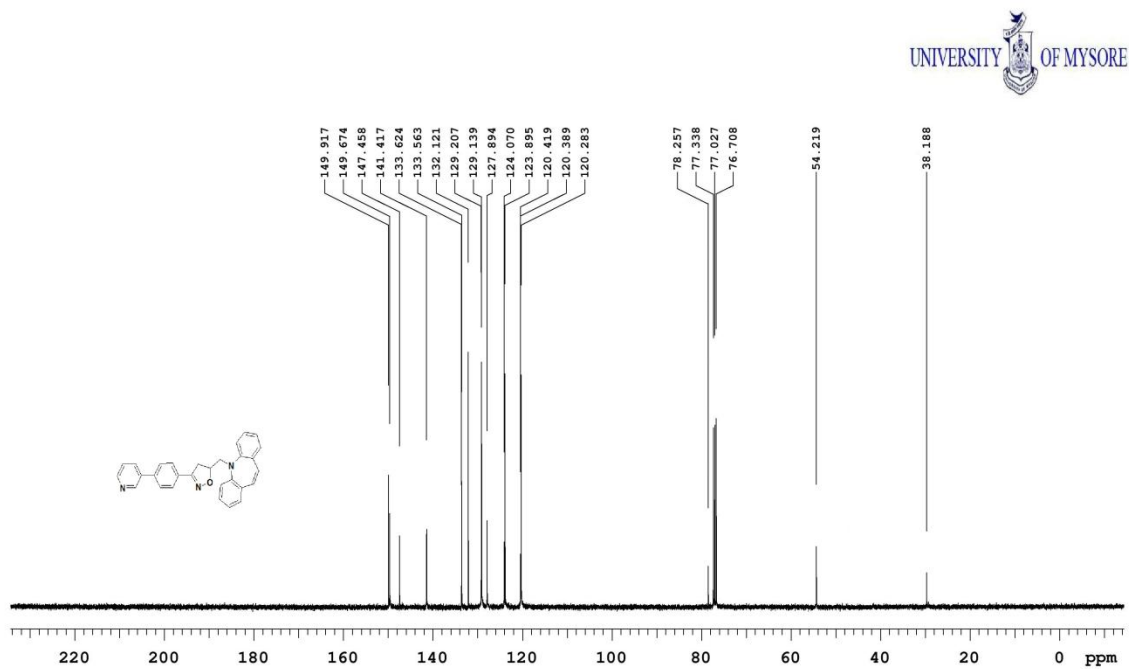

**Figure S12** Mass, <sup>1</sup>H and <sup>13</sup>C NMR spectra of compound 6j



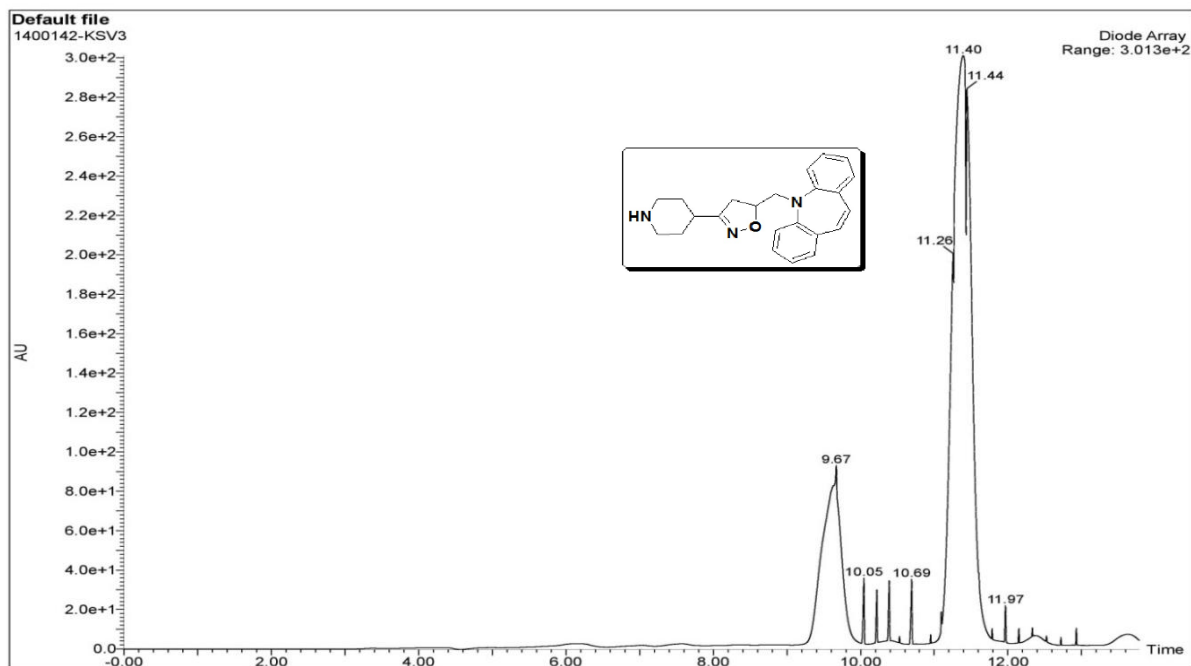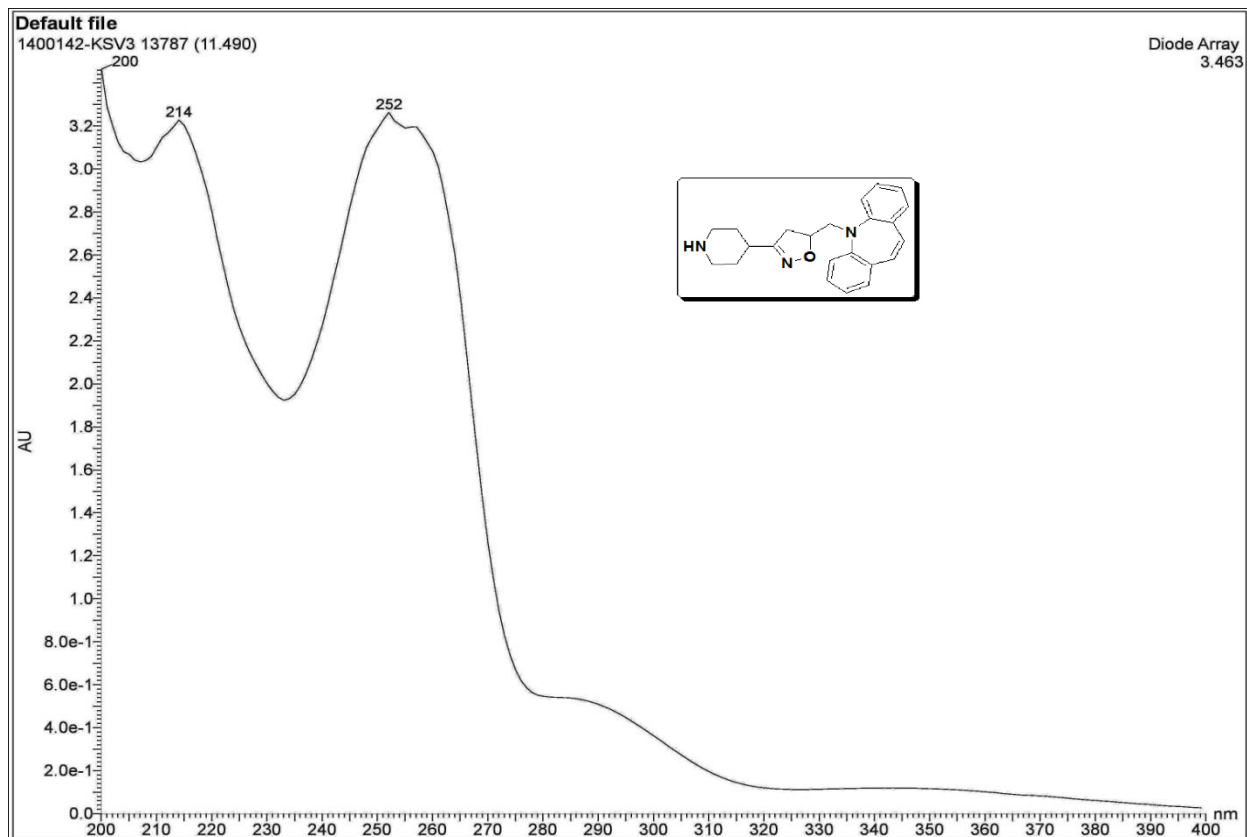

HPLC



14001266-KSV3-F

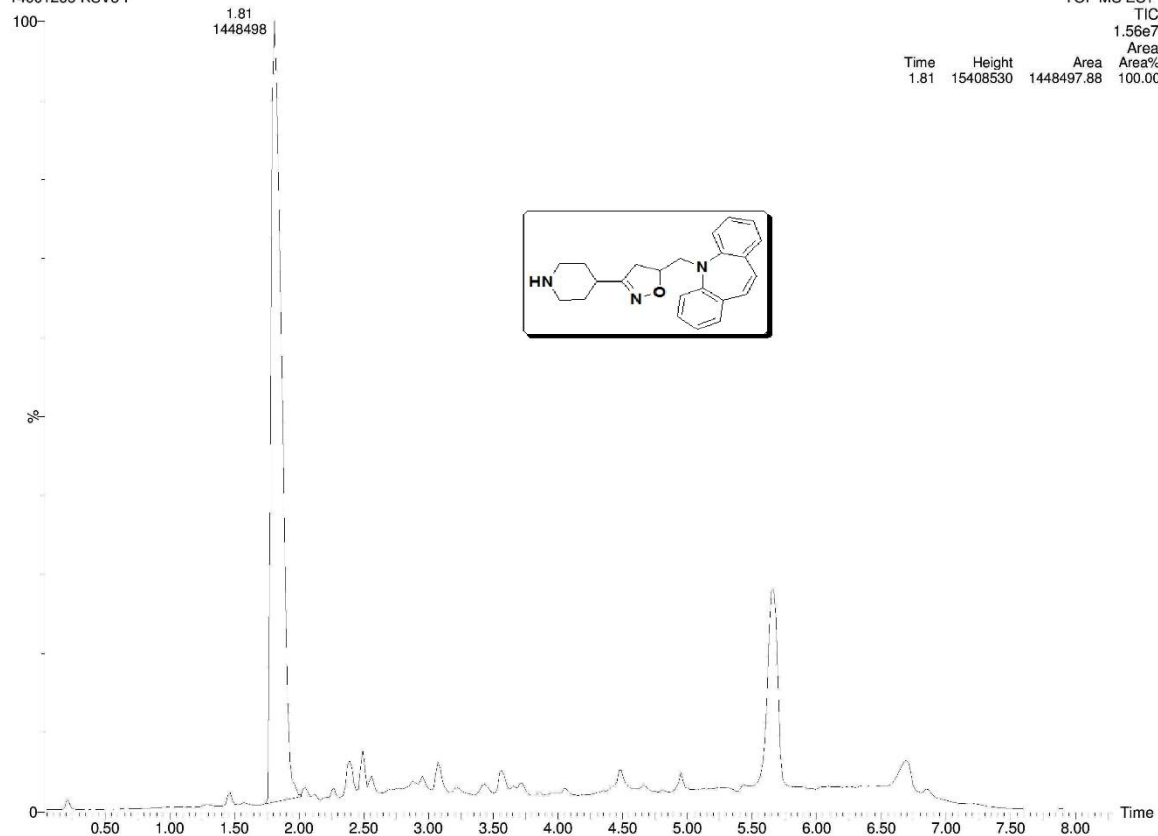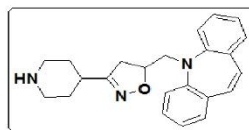

14001266-KSV3-F 107 (1.844)

TOF MS ES+  
4.20e6

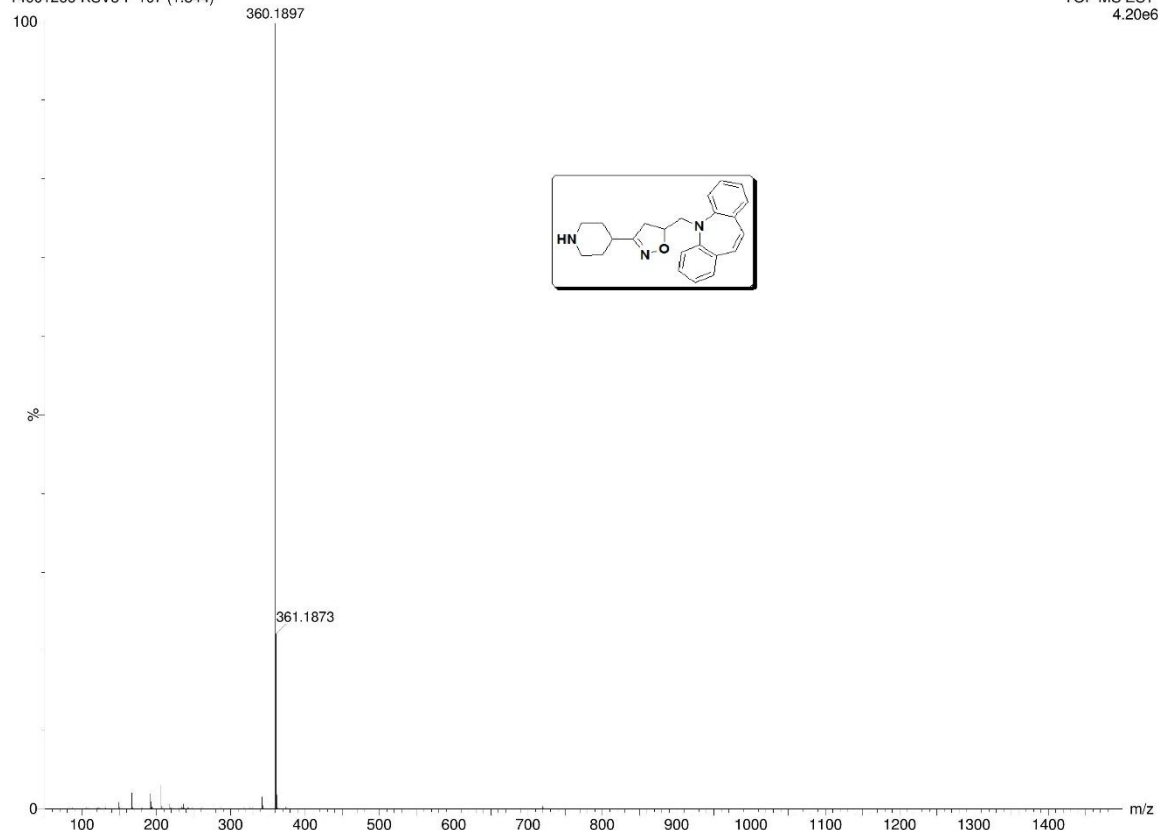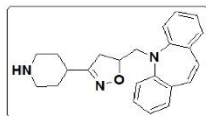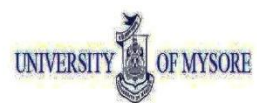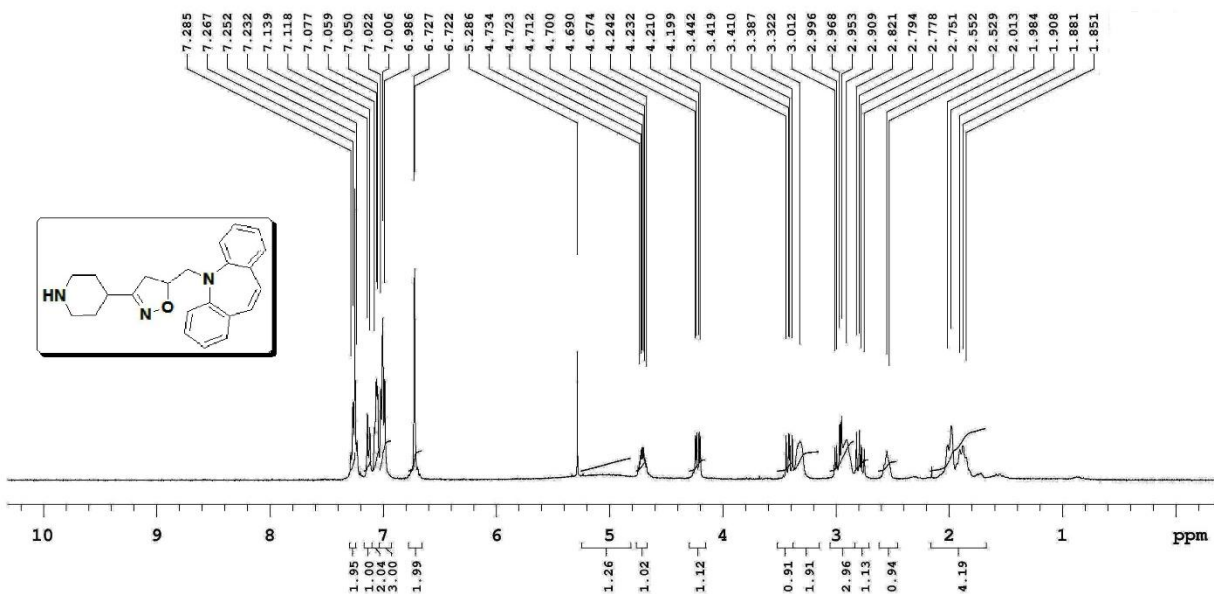

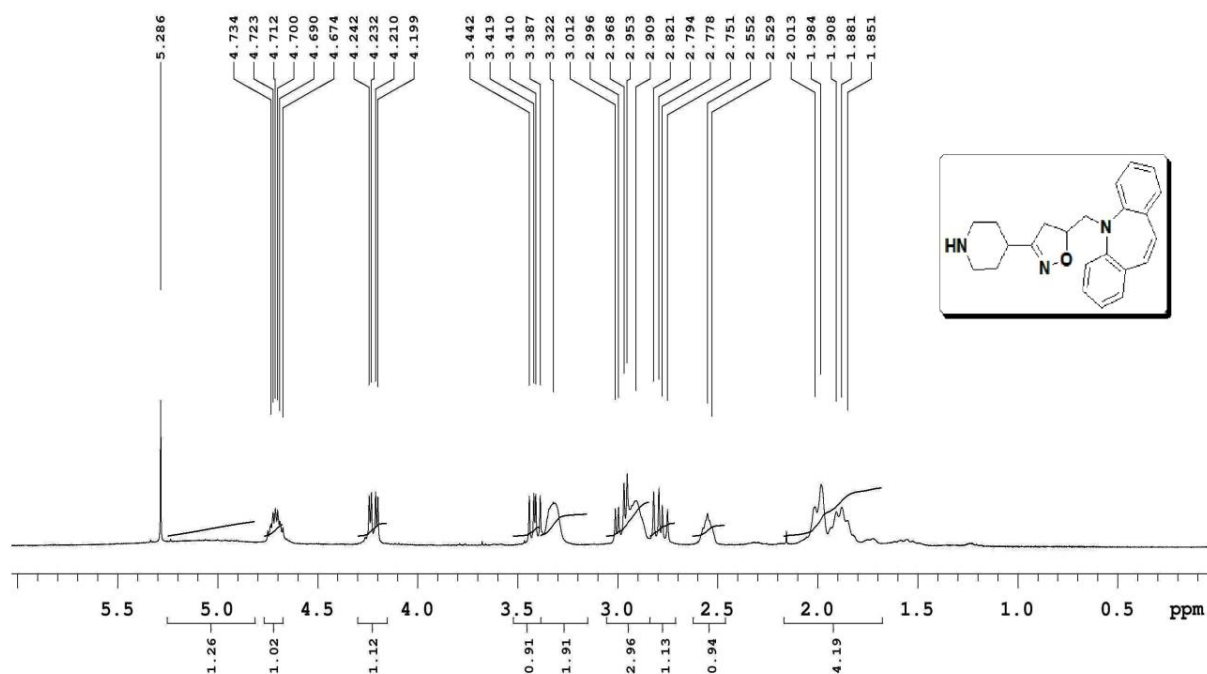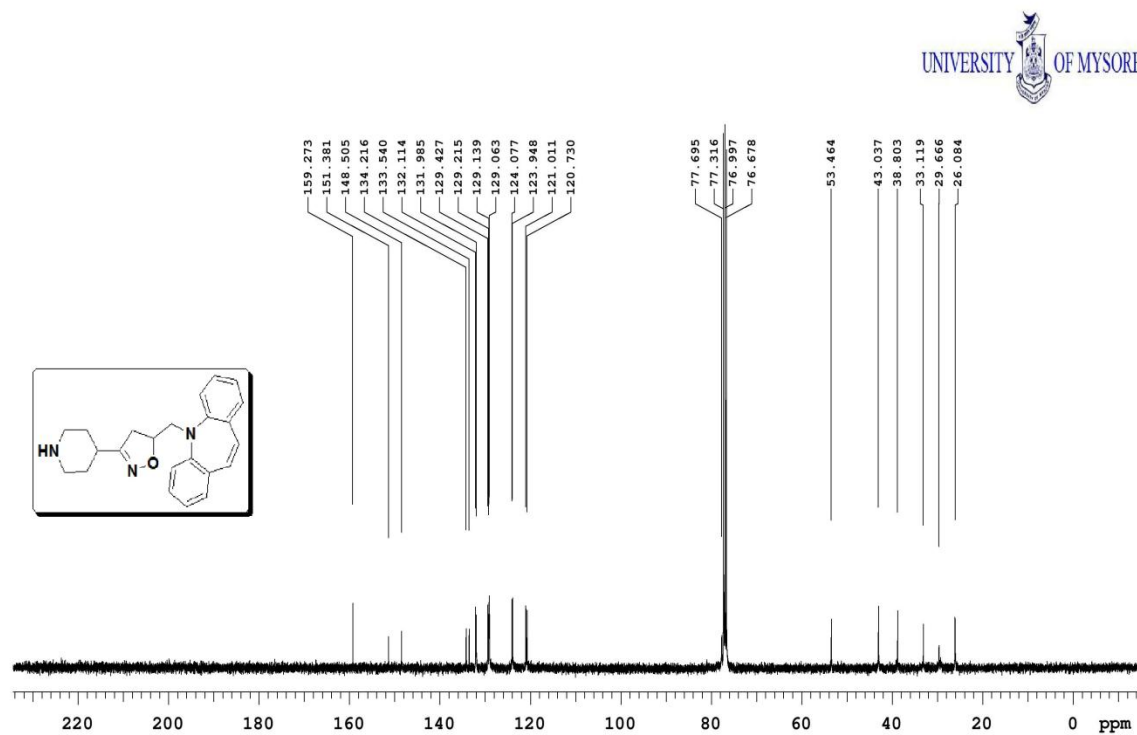

**Figure S13** HPLC, Mass, <sup>1</sup>H and <sup>13</sup>C NMR spectra of compound **6k**

1  
14000458-VT-1

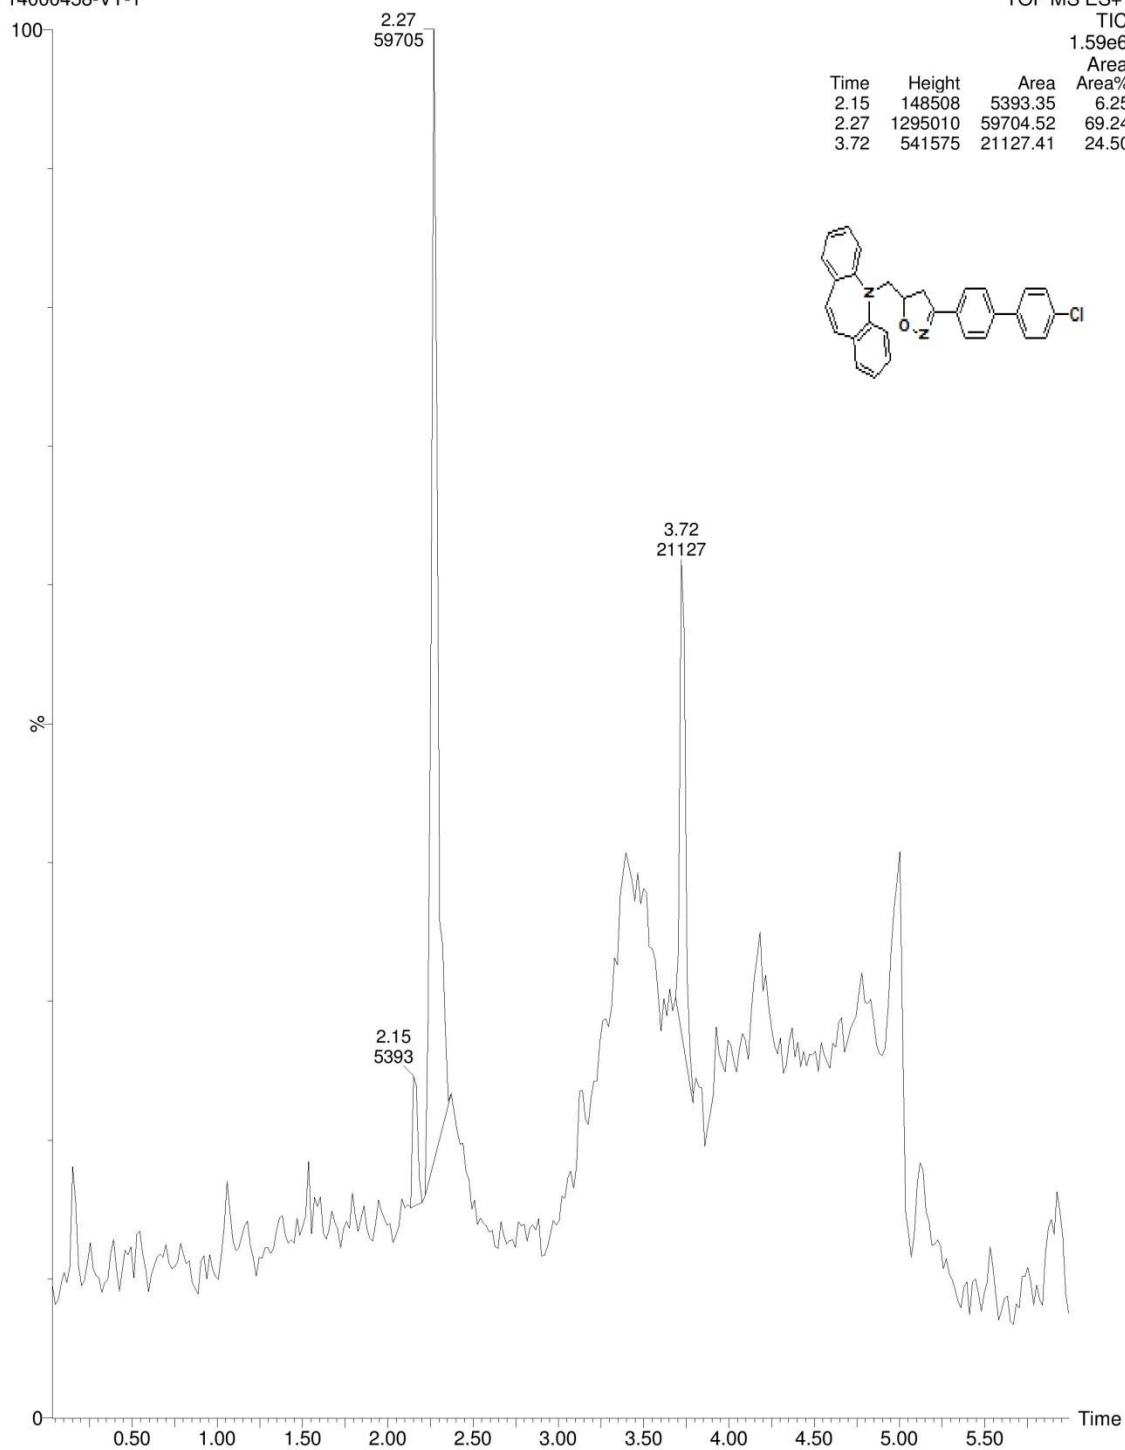

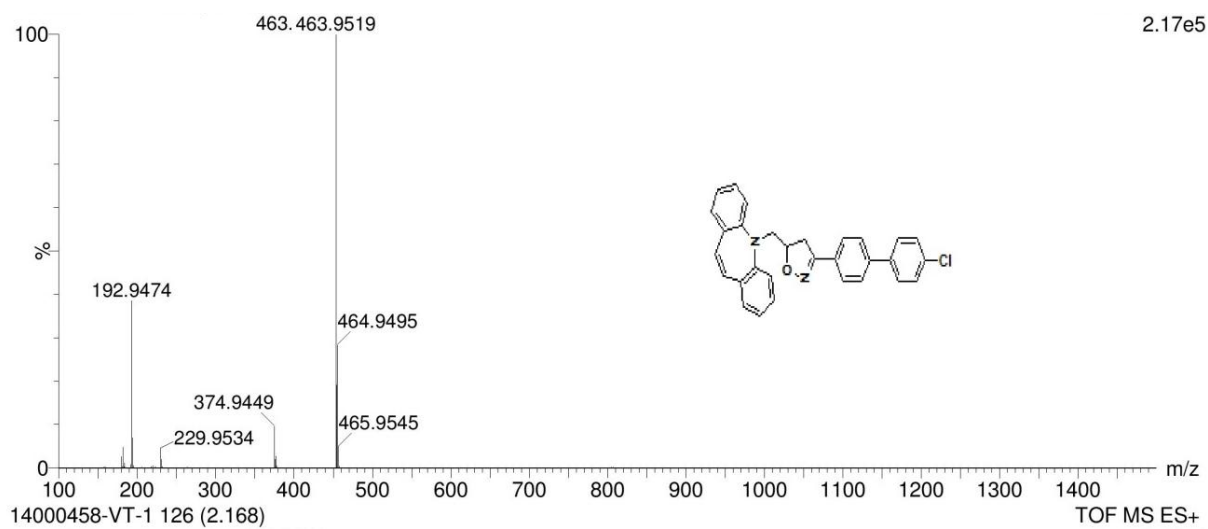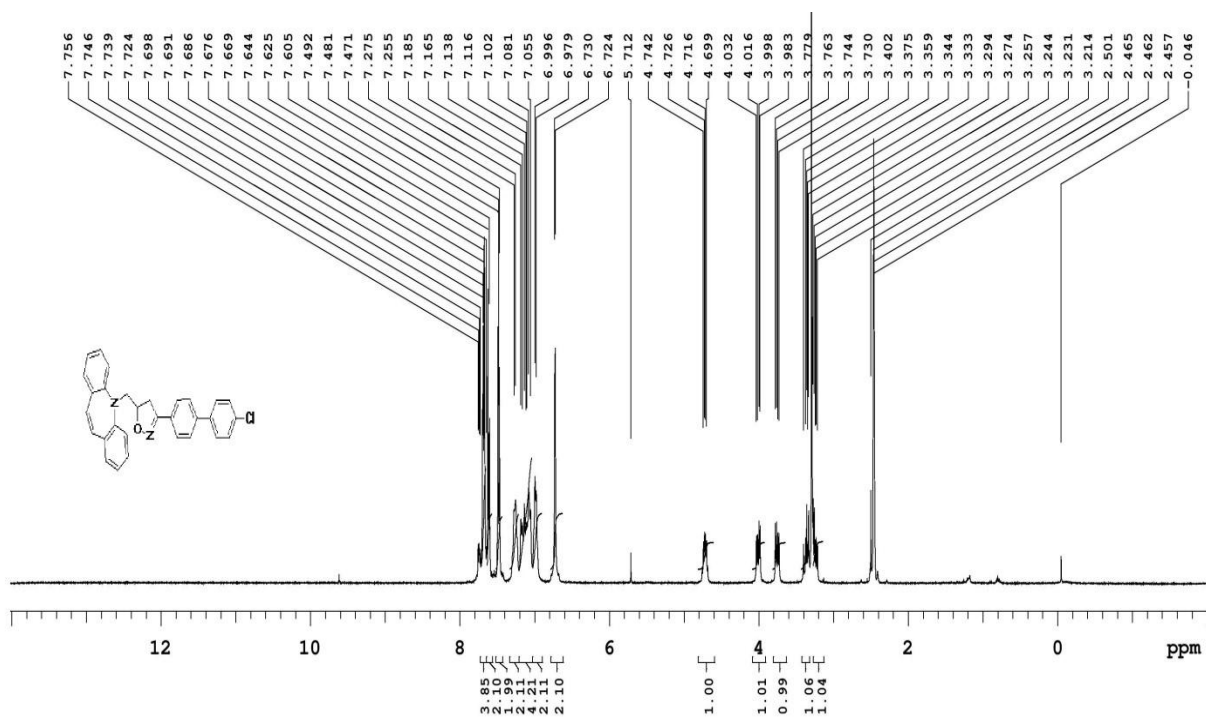

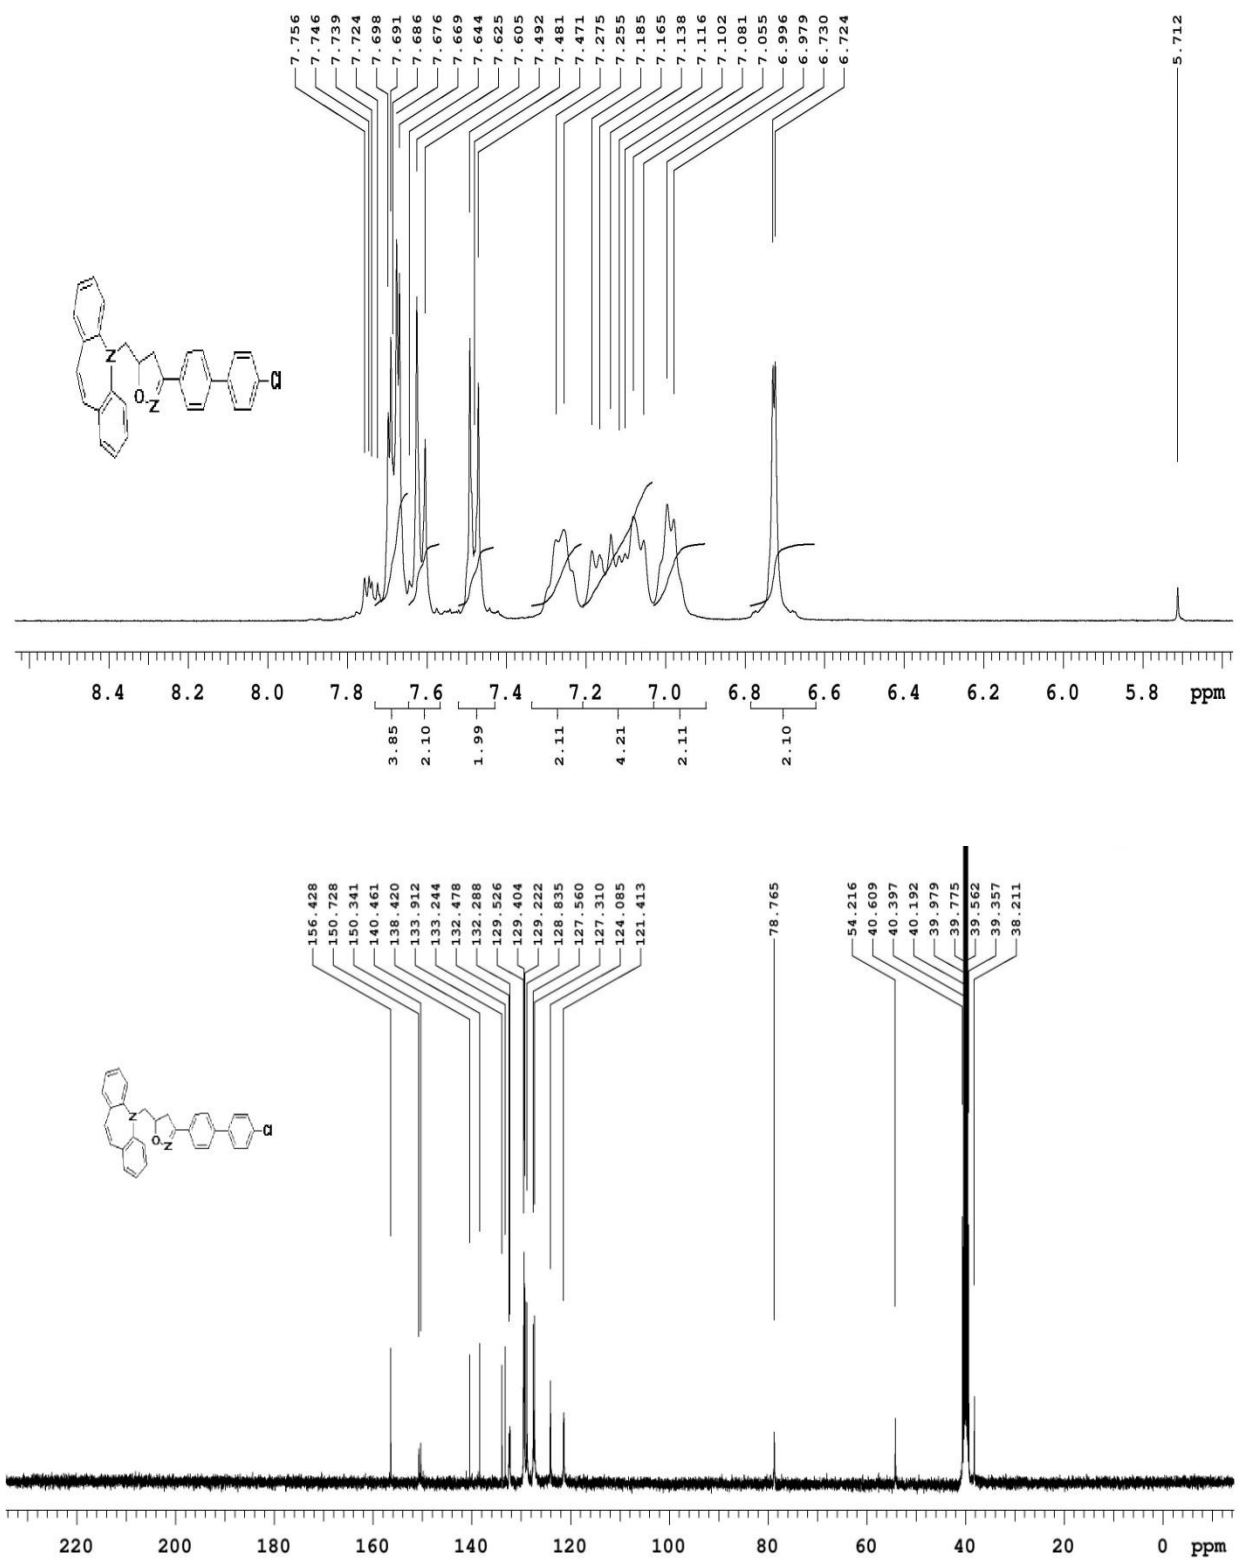

**Figure S14** Mass, <sup>1</sup>H and <sup>13</sup>C NMR spectra of compound 8a

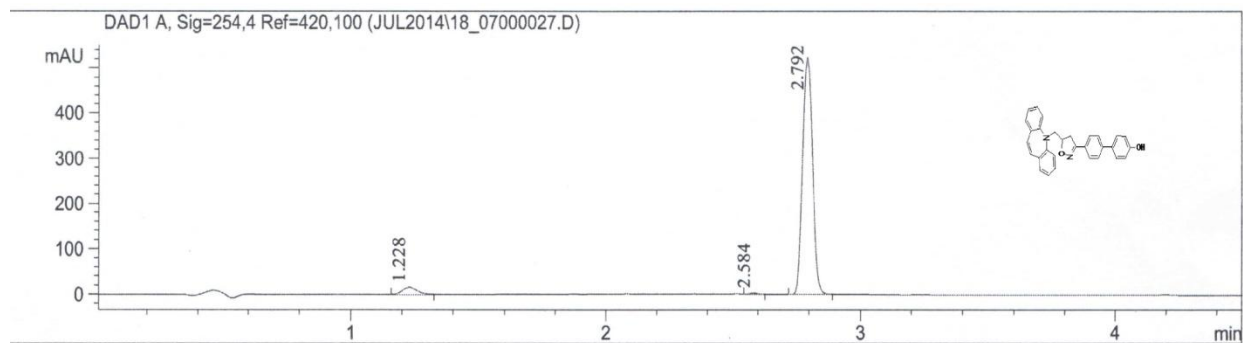

| Peak No | RT min | Area     | Area % |
|---------|--------|----------|--------|
| 1       | 1.228  | 74.716   | 4.925  |
| 2       | 2.584  | 10.604   | 0.699  |
| 3       | 2.792  | 1431.727 | 94.376 |

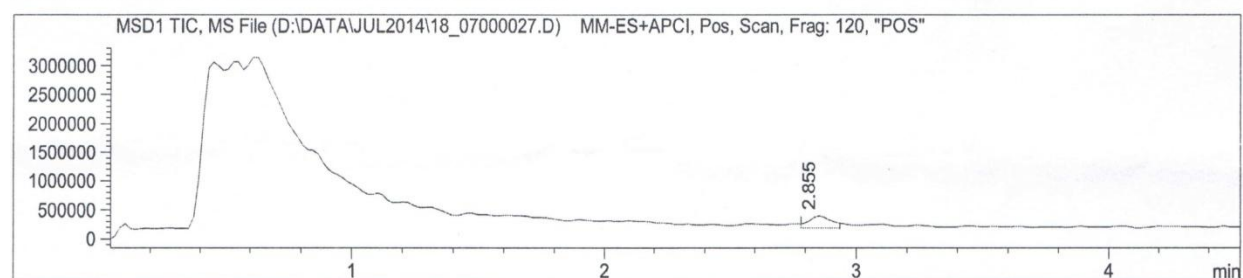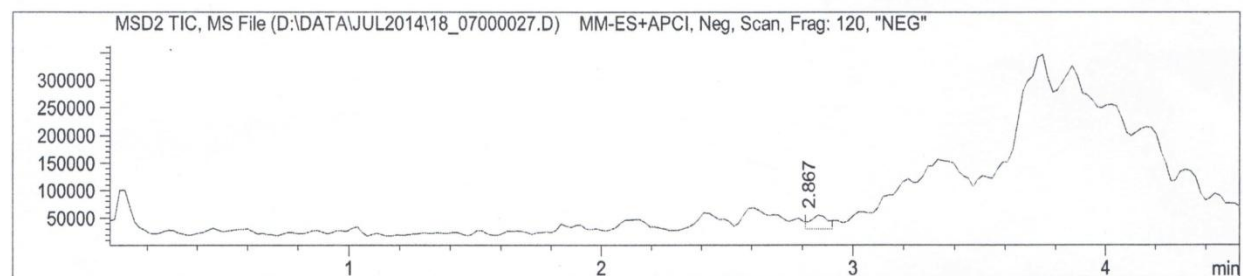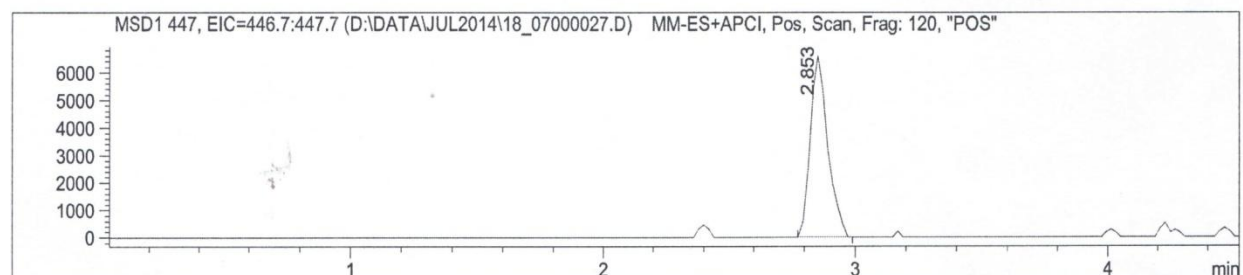

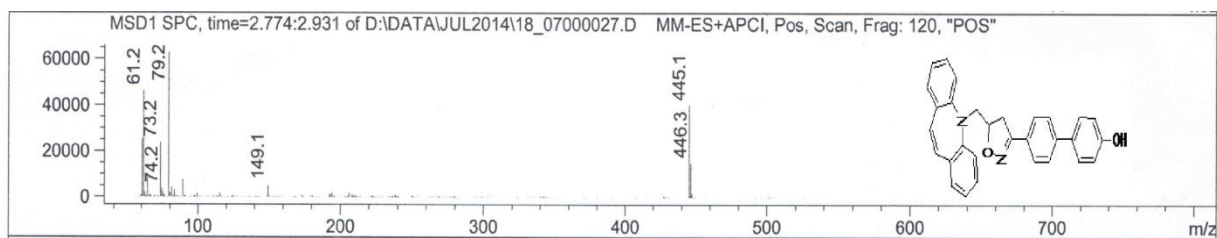

1400758-SB14-1H

expl PROTON

SAMPLE PRESATURATION  
 date Apr 11 2014 satmode n  
 solvent dmsd wet  
 file /home/IOE/UOM- SPECIAL6  
 /APR-14/1400758-SB- temp not used  
 14-1H.fid gain 30  
 ACQUISITION spin not used  
 sw 6410.3 hst 0.008  
 at 2.556 pw90 15.000  
 np 32768 alfa 10.000  
 fb 4000  
 bs 32 il n  
 dl 1.000 in n  
 nt 8 dp y  
 ct 8 hs nn  
 TRANSMITTER PROCESSING  
 tn H1 fn not used  
 sfrq 399.830 DISPLAY  
 tof 399.8 sp -907.7  
 tpwr 58 wp 6409.9  
 pw 7.500 rfl 1903.6  
 DECOUPLER rfp 995.6  
 dn C13 rp -21.5  
 dof 0 lp 0  
 dm nnn PLOT  
 decwave W40\_HCN5mm wc 250  
 dpwr 0 sc 0  
 dmf 200 vs 603  
 th 6  
 ai cdc ph

UNIVERSITY OF MYSORE

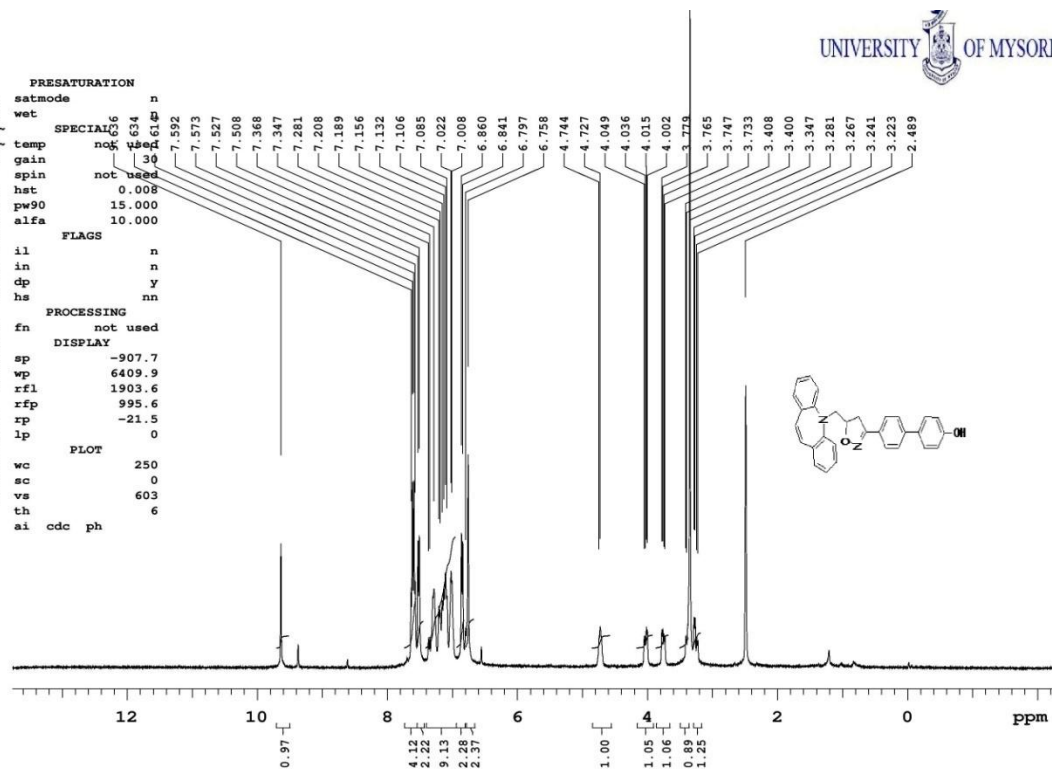



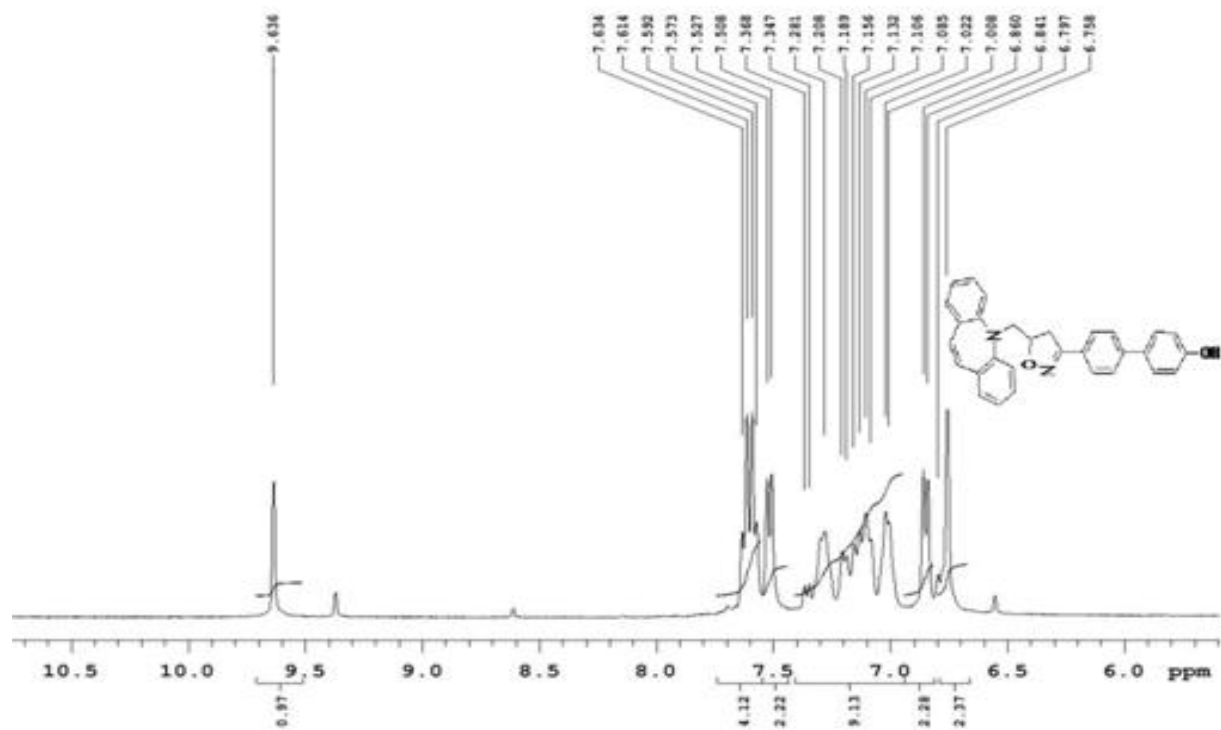

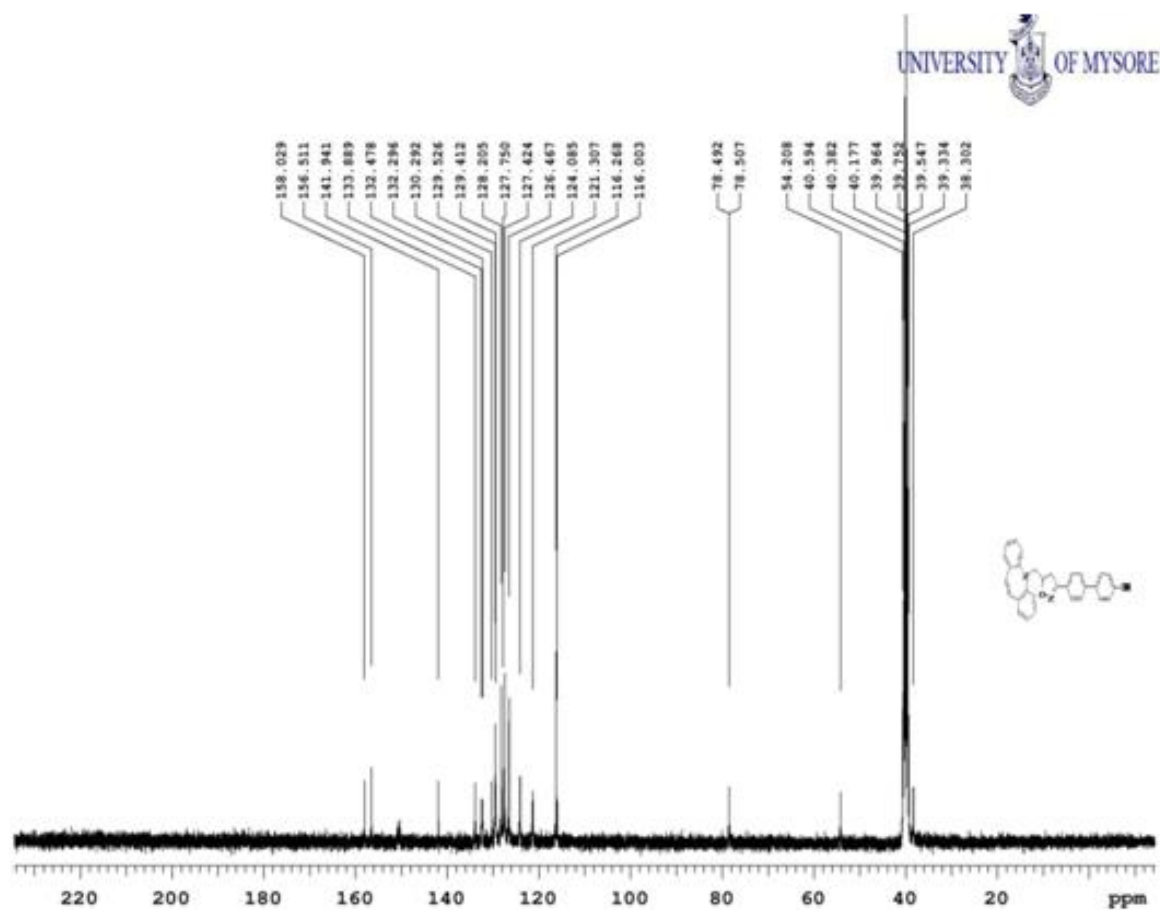

**Figure S15** Mass, <sup>1</sup>H and <sup>13</sup>C NMR spectra of compound **8b**

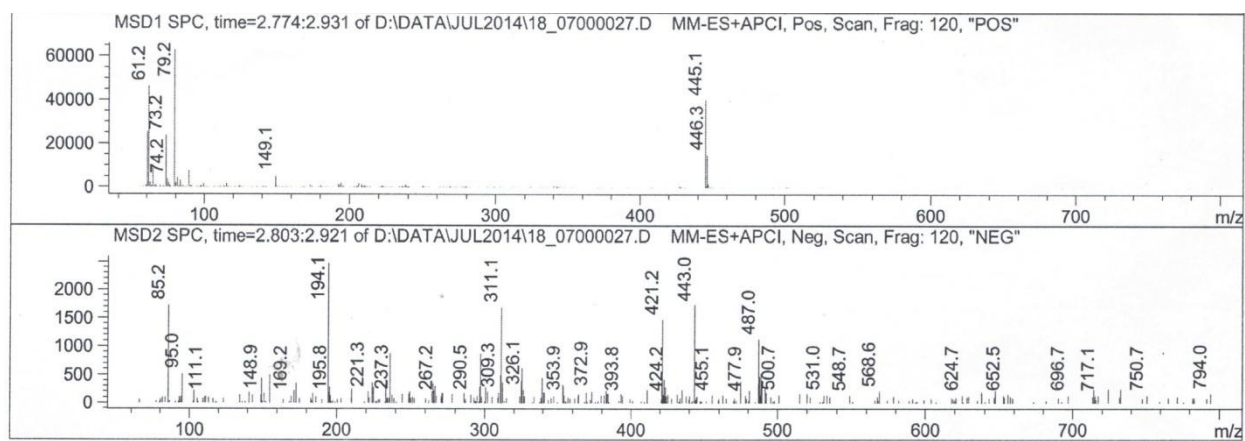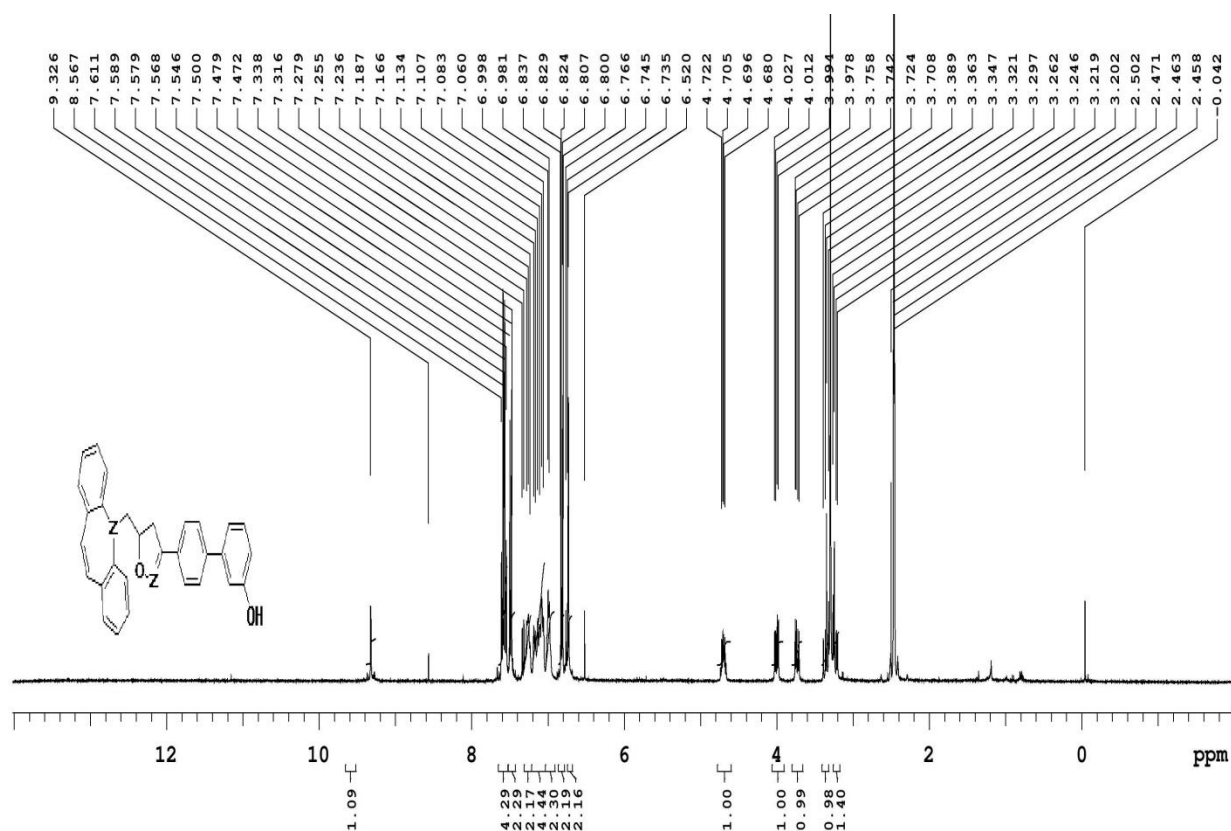

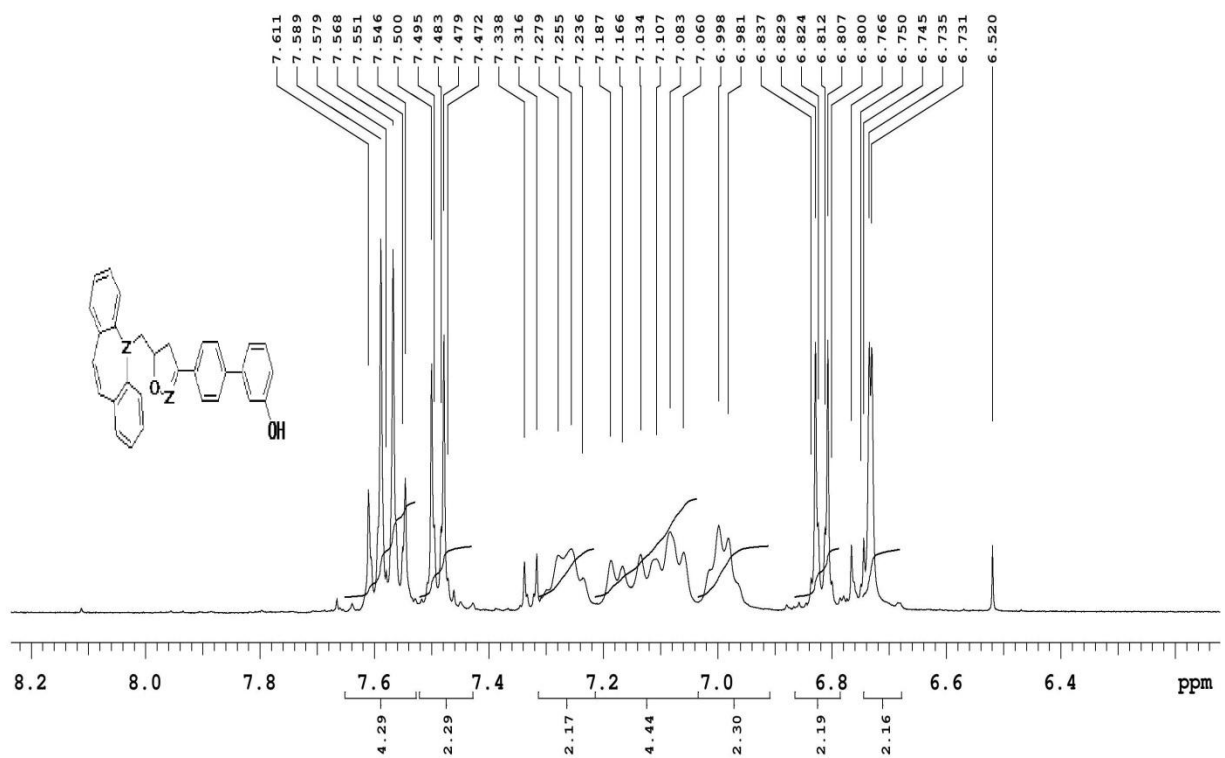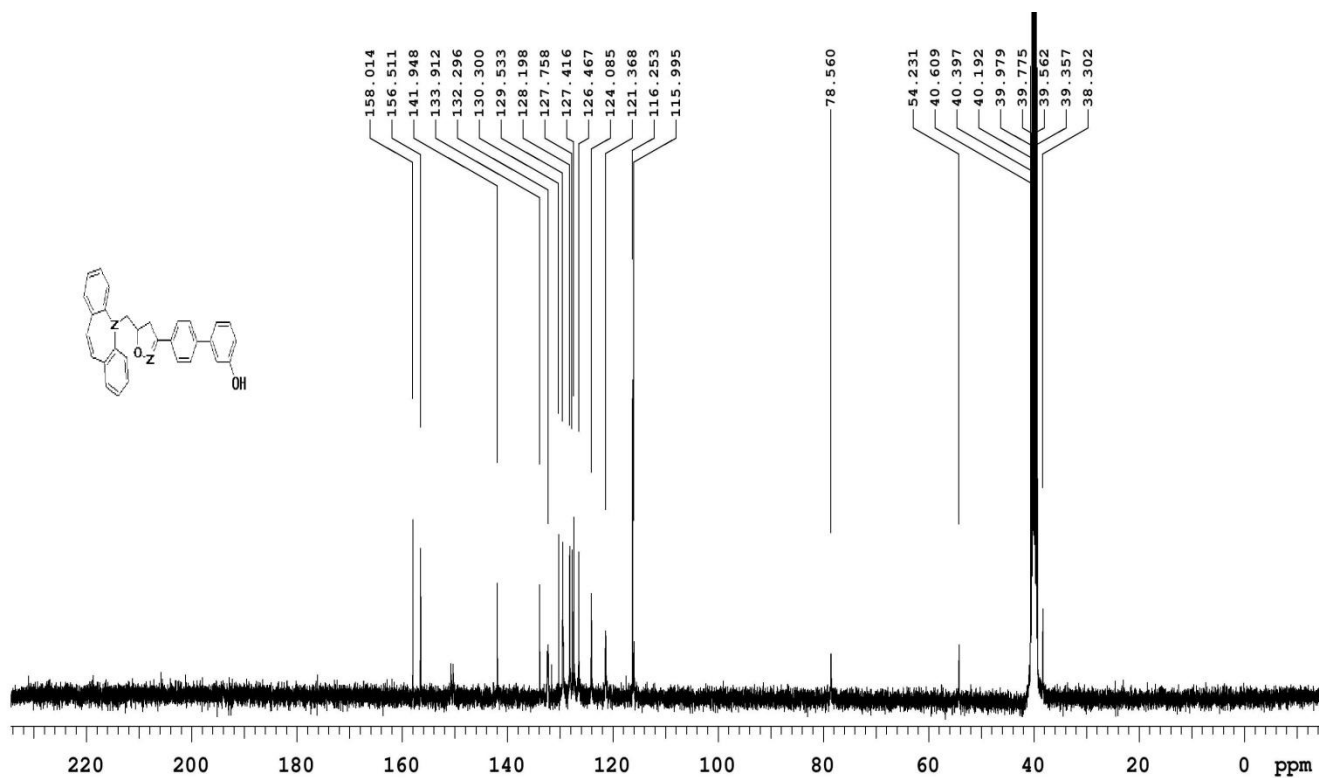

**Figure S16** Mass, <sup>1</sup>H and <sup>13</sup>C NMR spectra of compound **8c**

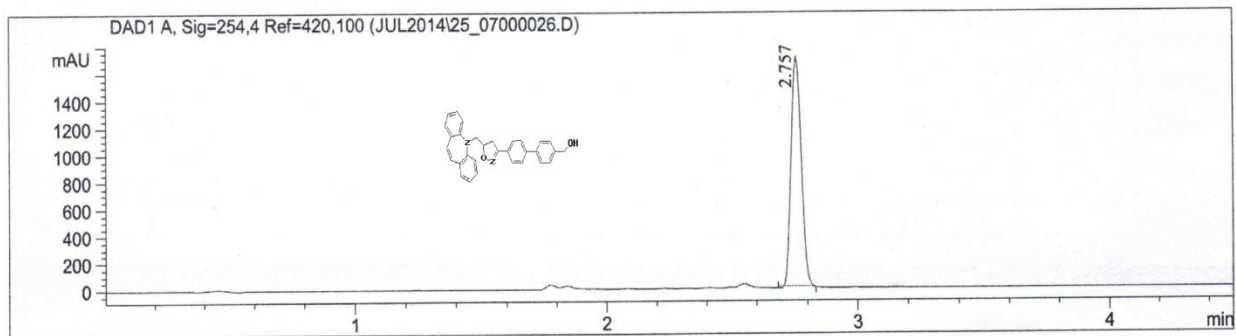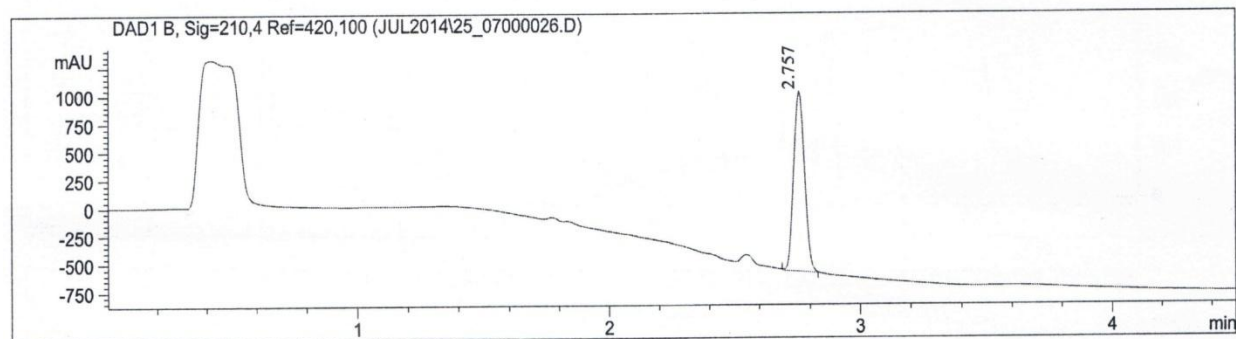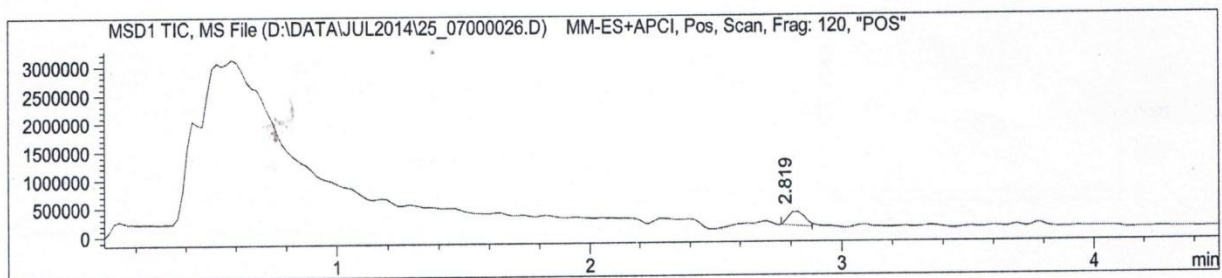

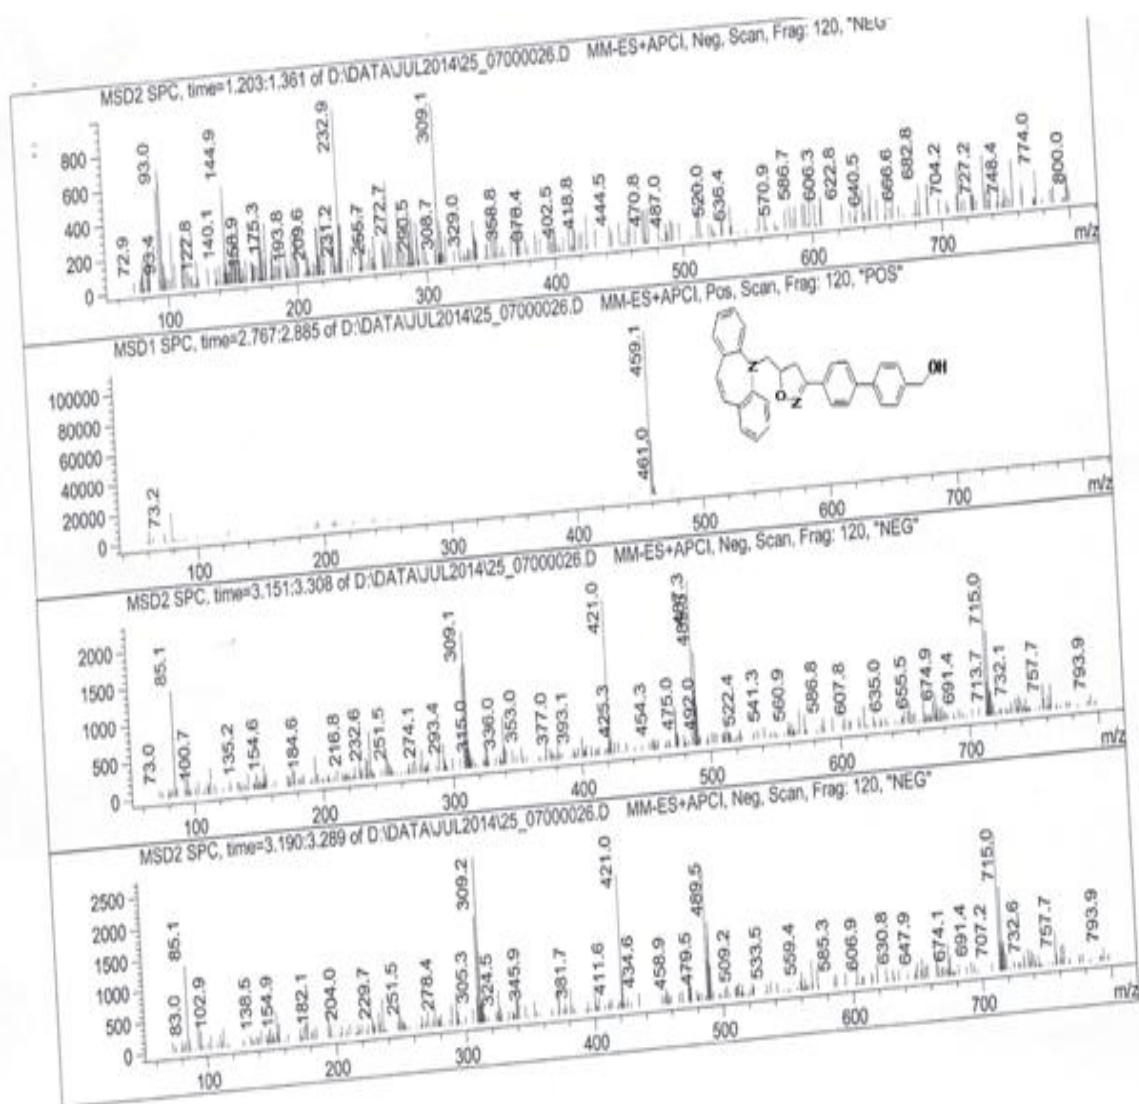

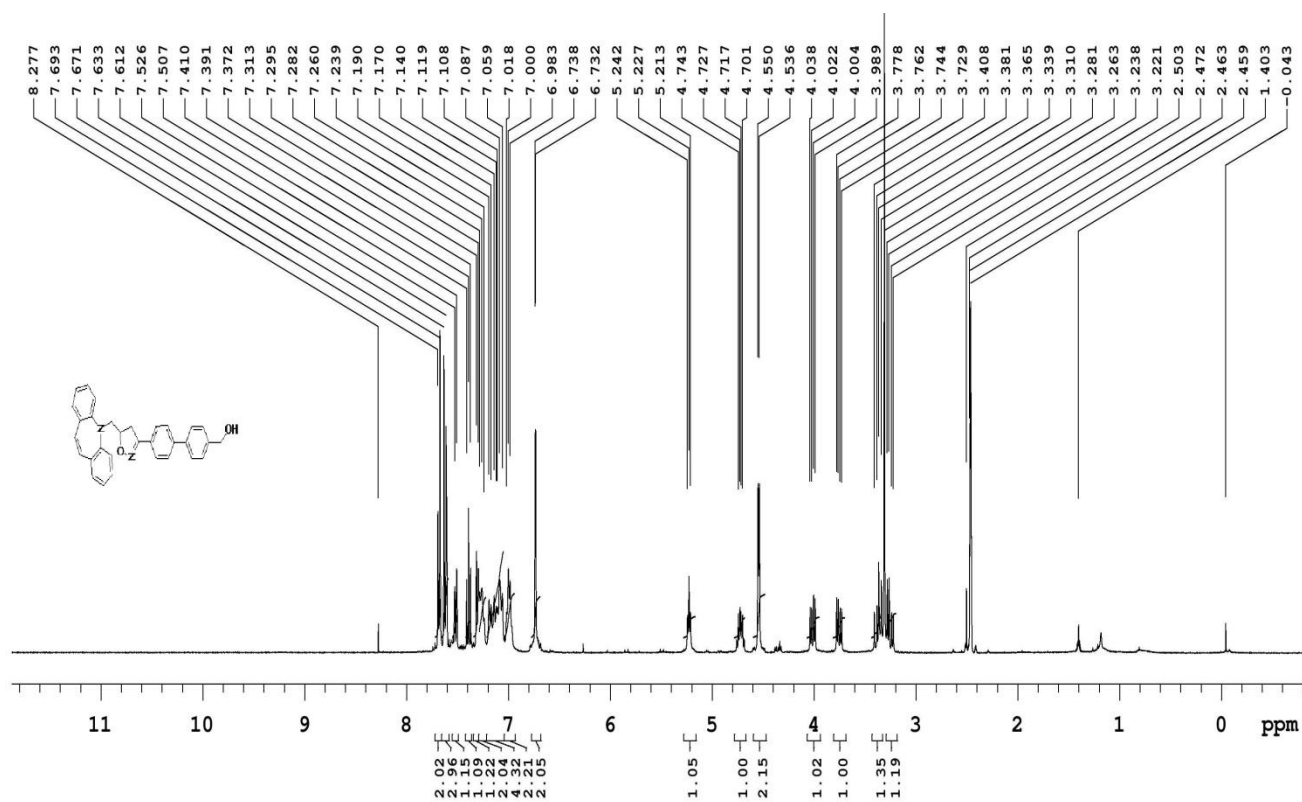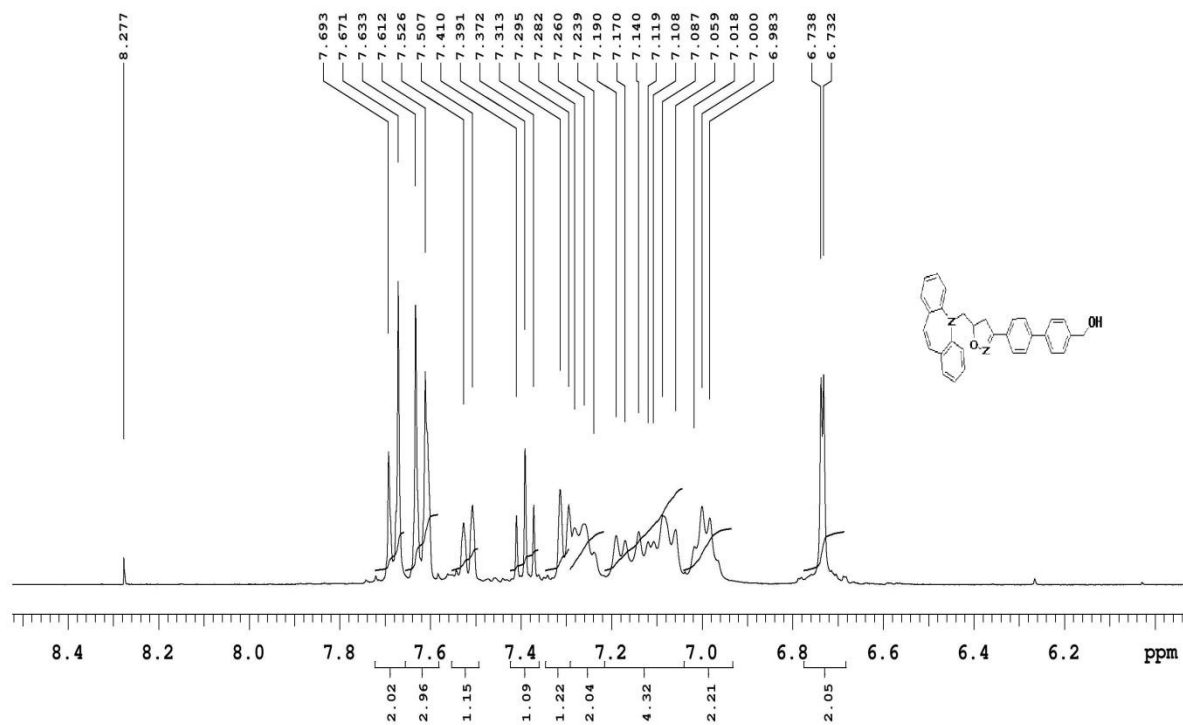

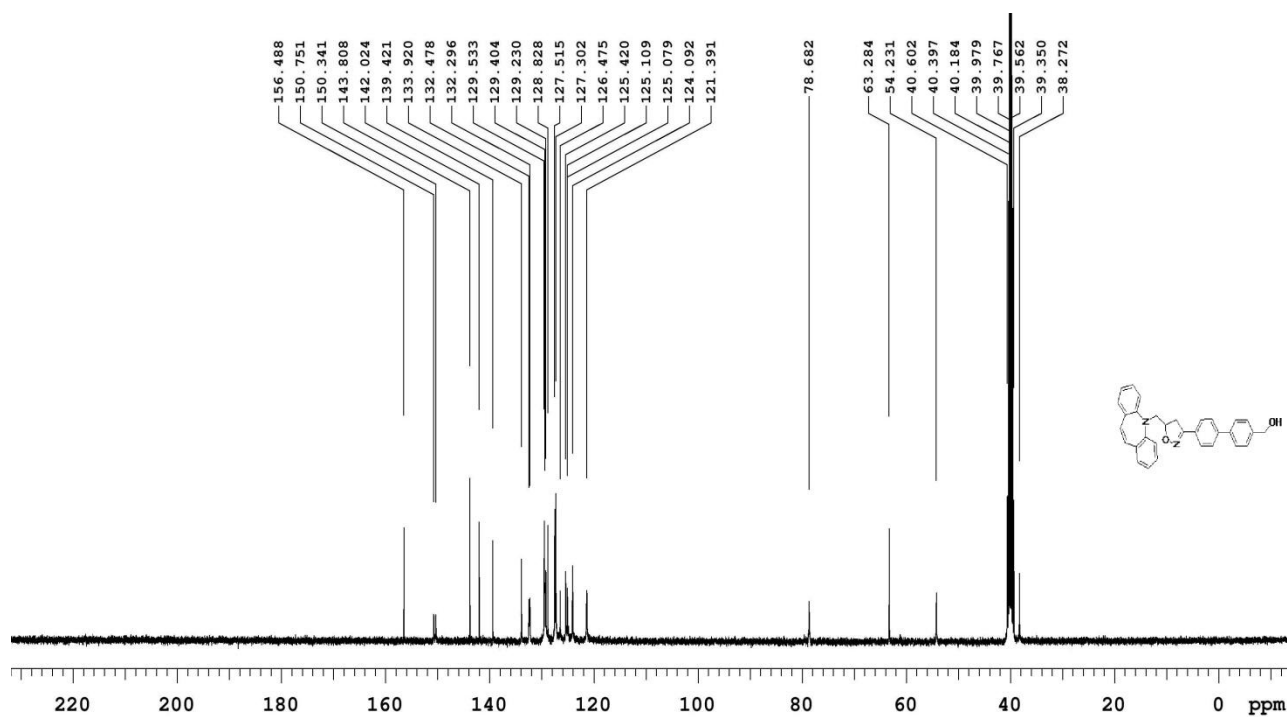

**Figure S17** Mass, <sup>1</sup>H and <sup>13</sup>C NMR spectra of compound **8d**



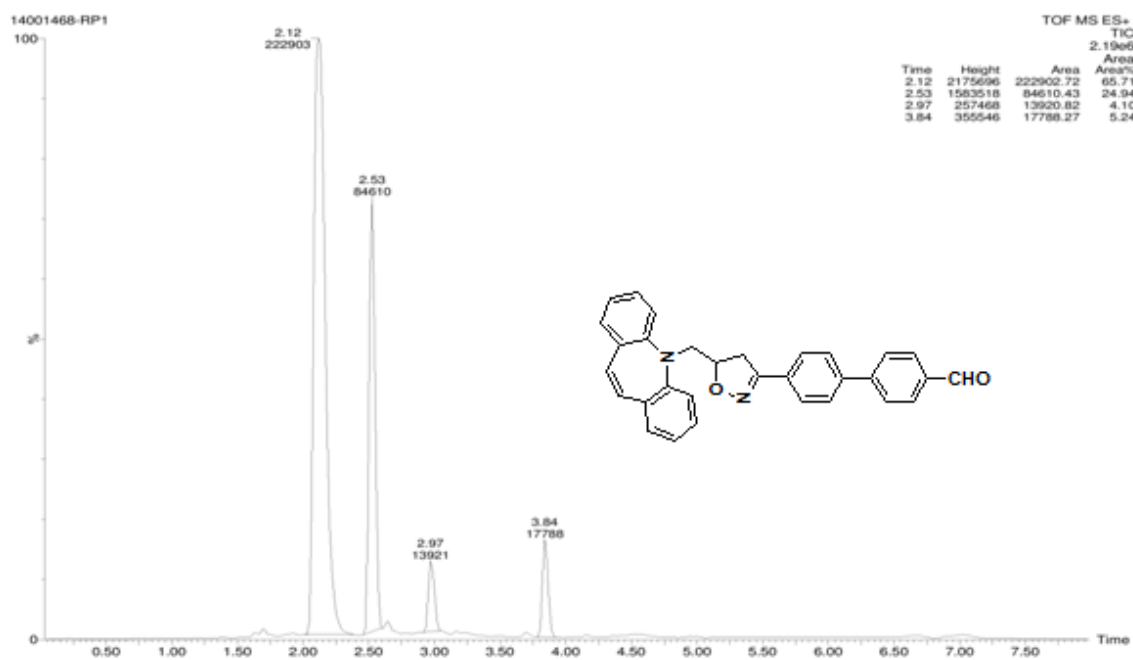

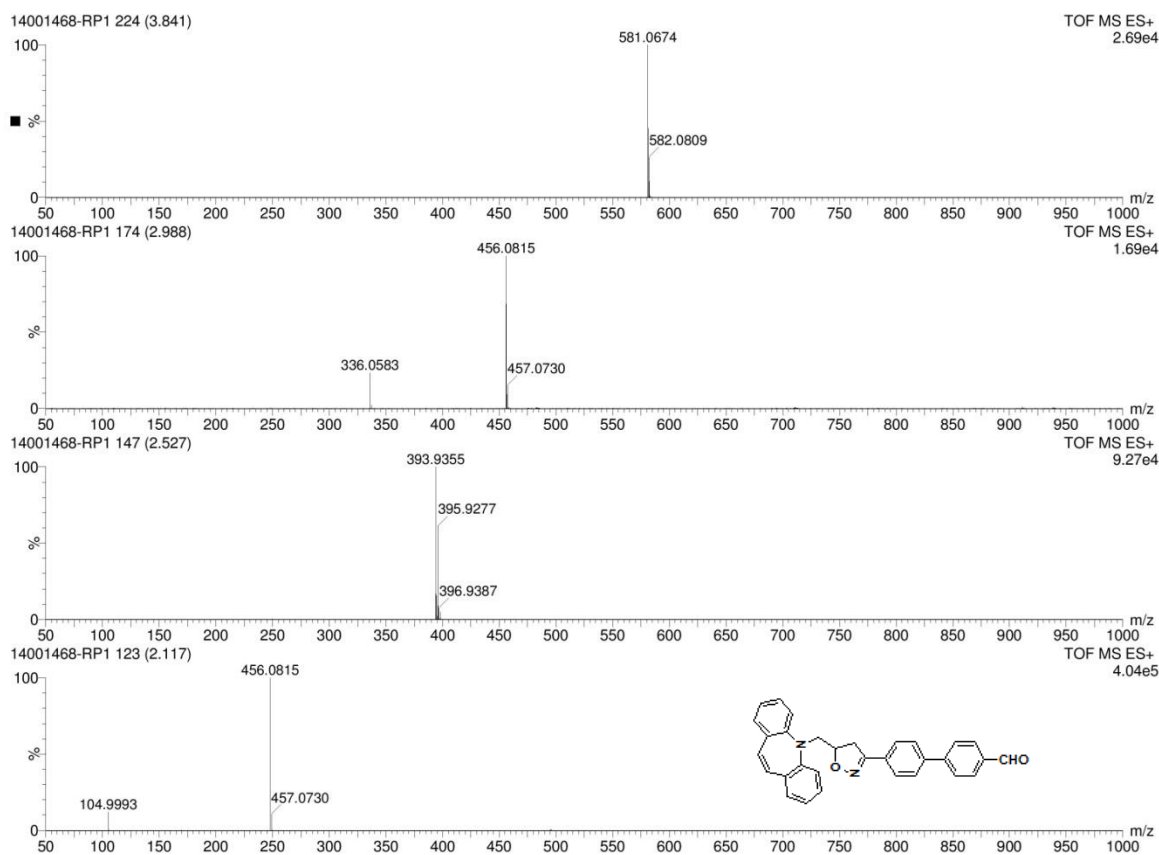

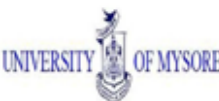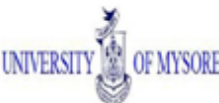

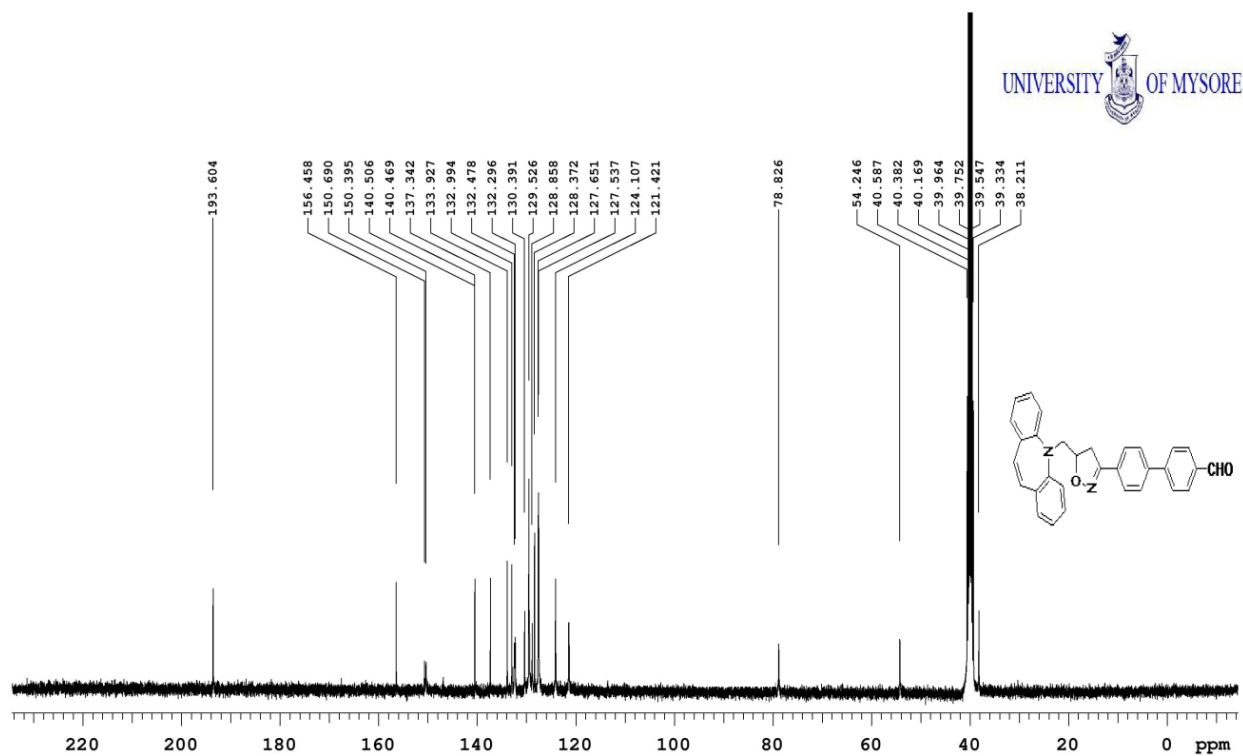

**Figure S18** Mass, <sup>1</sup>H and <sup>13</sup>C NMR spectra of compound **8e**

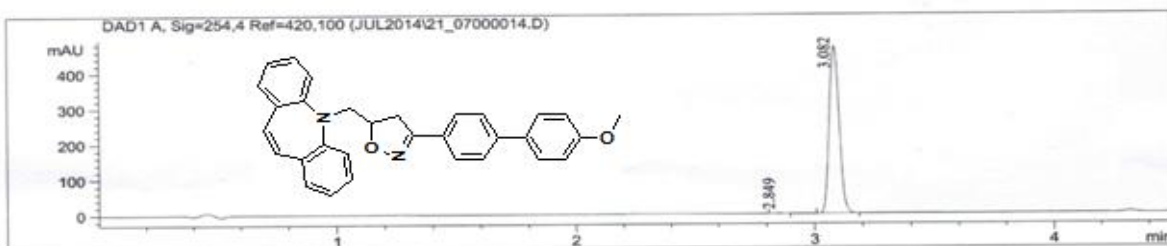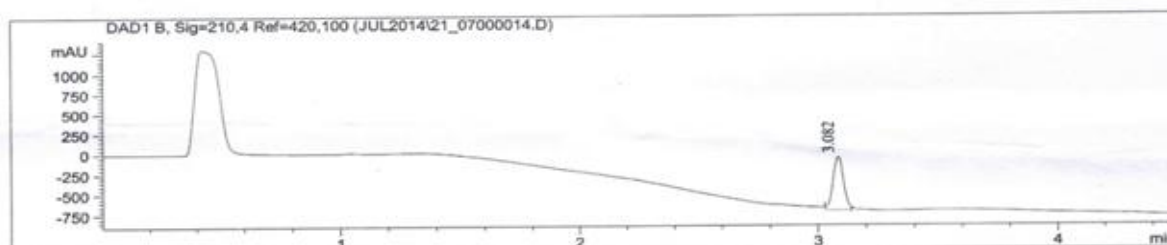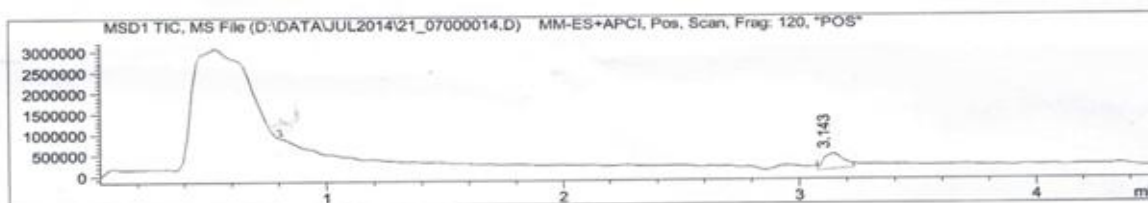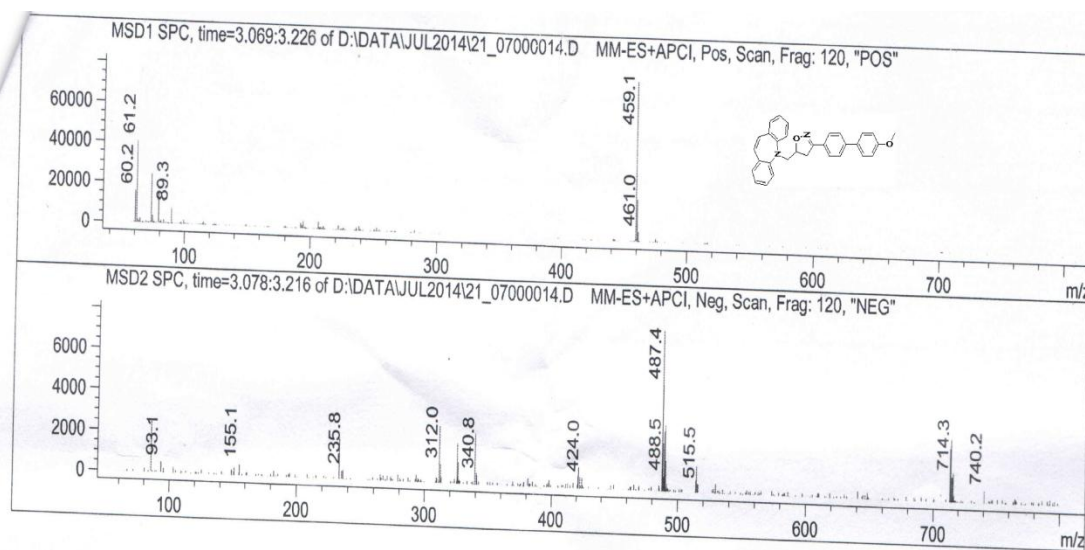

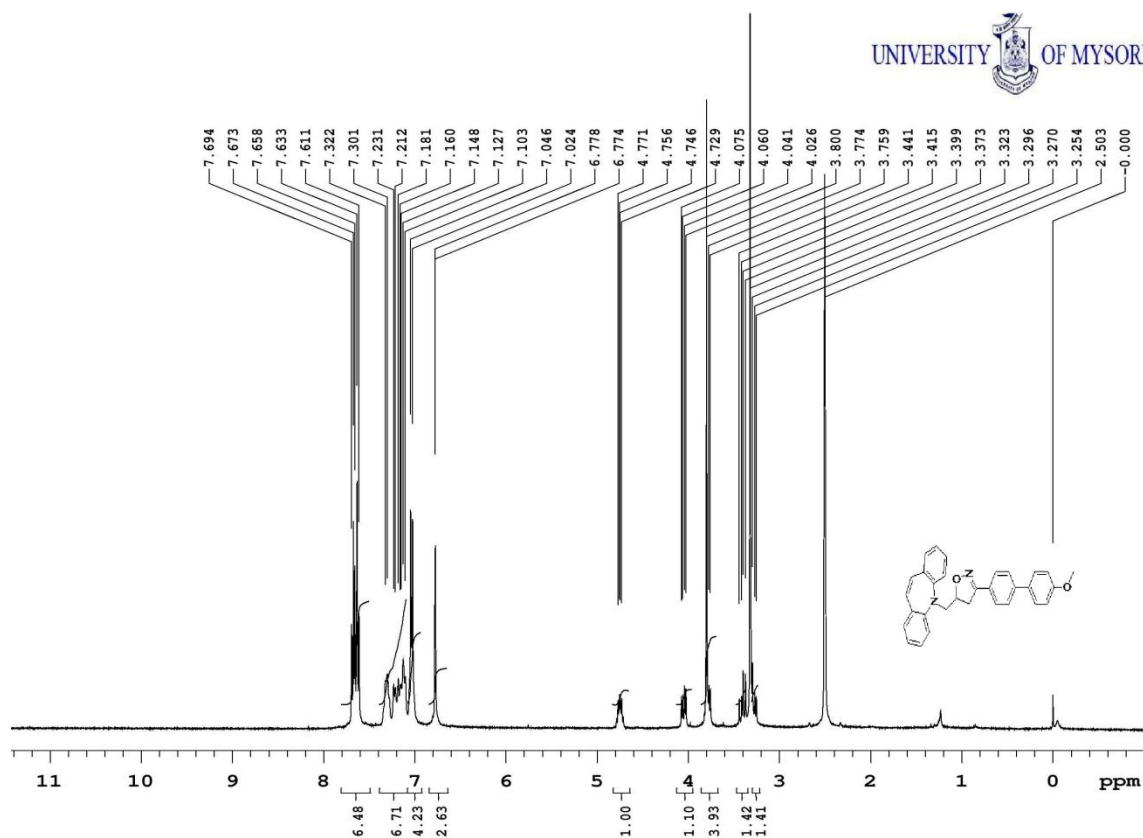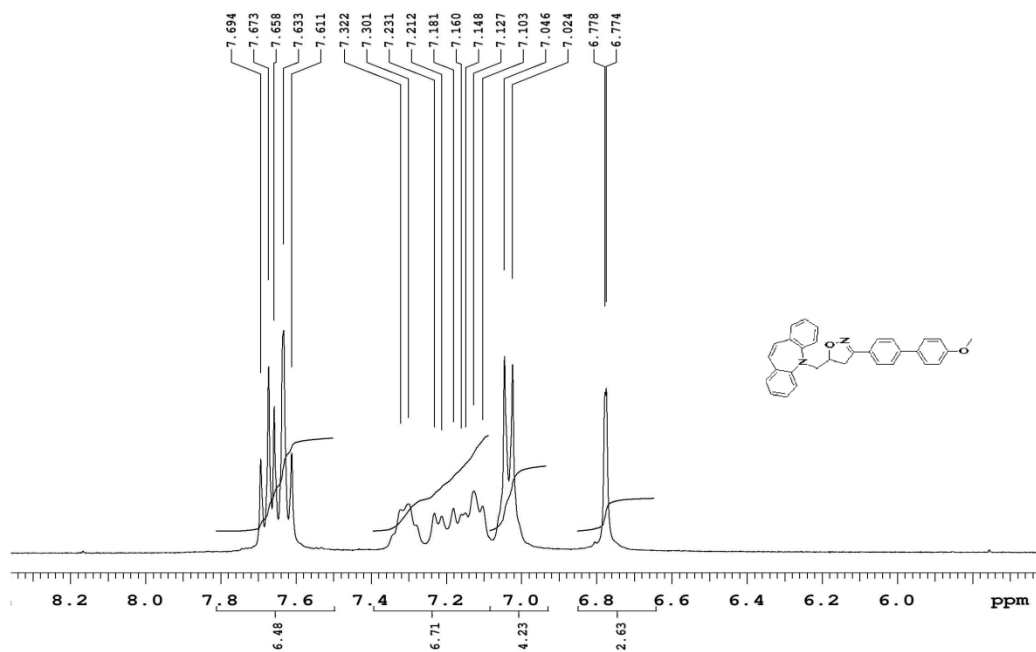

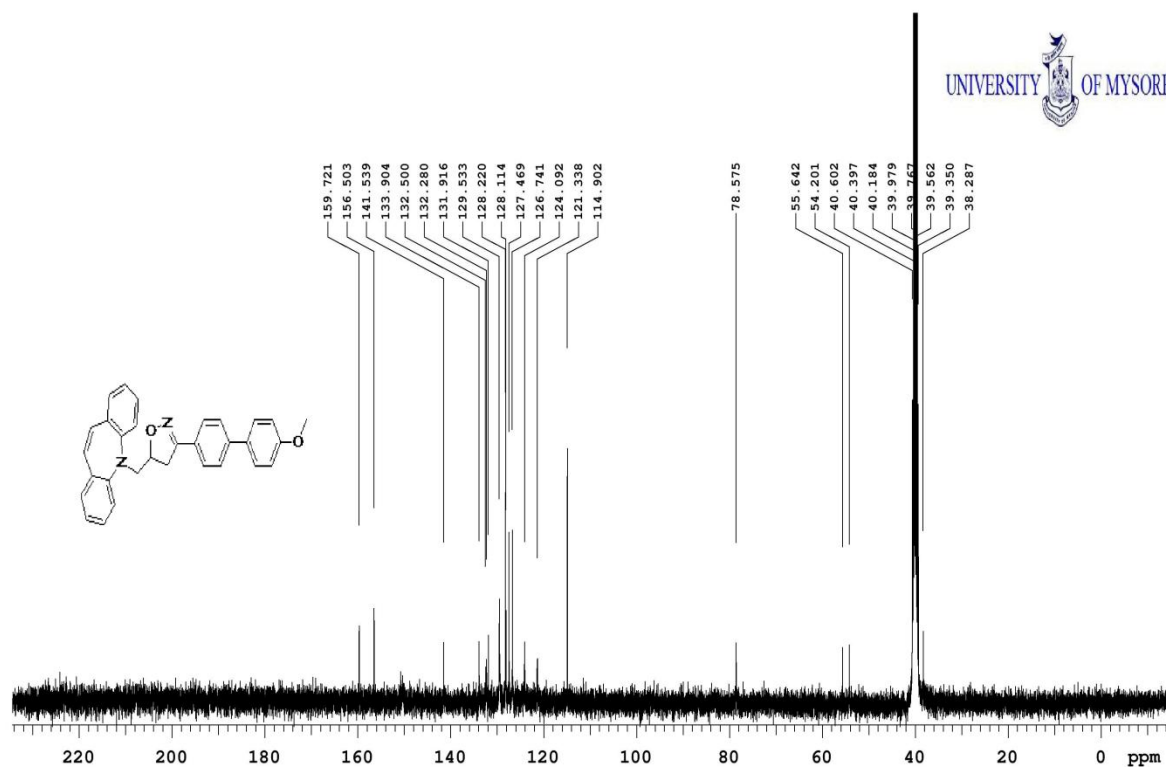

**Figure S19** Mass,  $^1\text{H}$  and  $^{13}\text{C}$  NMR spectra of compound **8f**

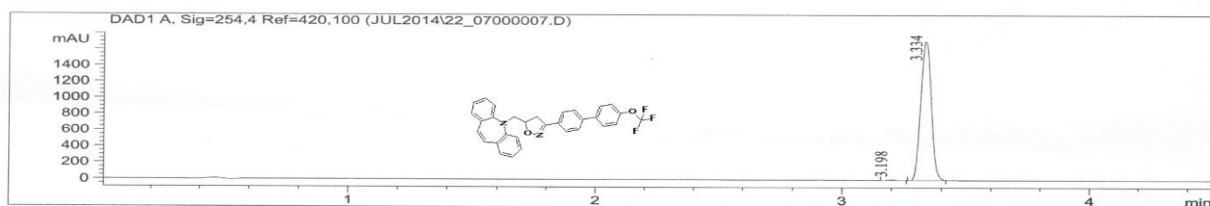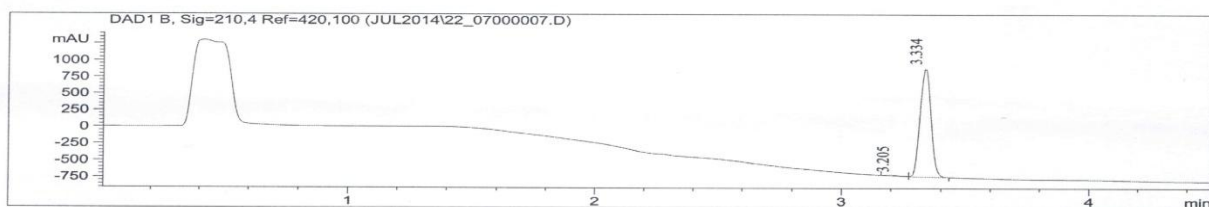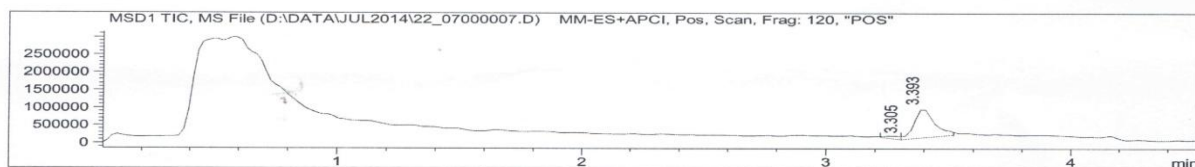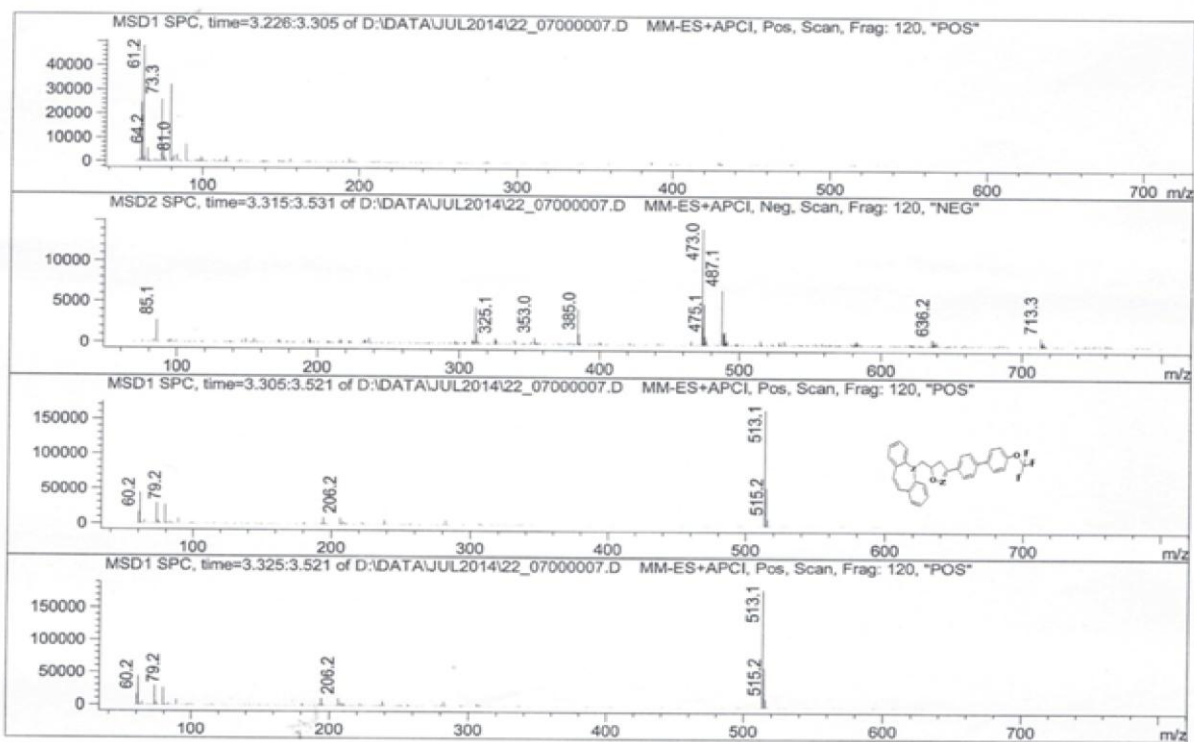



1400779-SBS-1H

expl1 PROTON

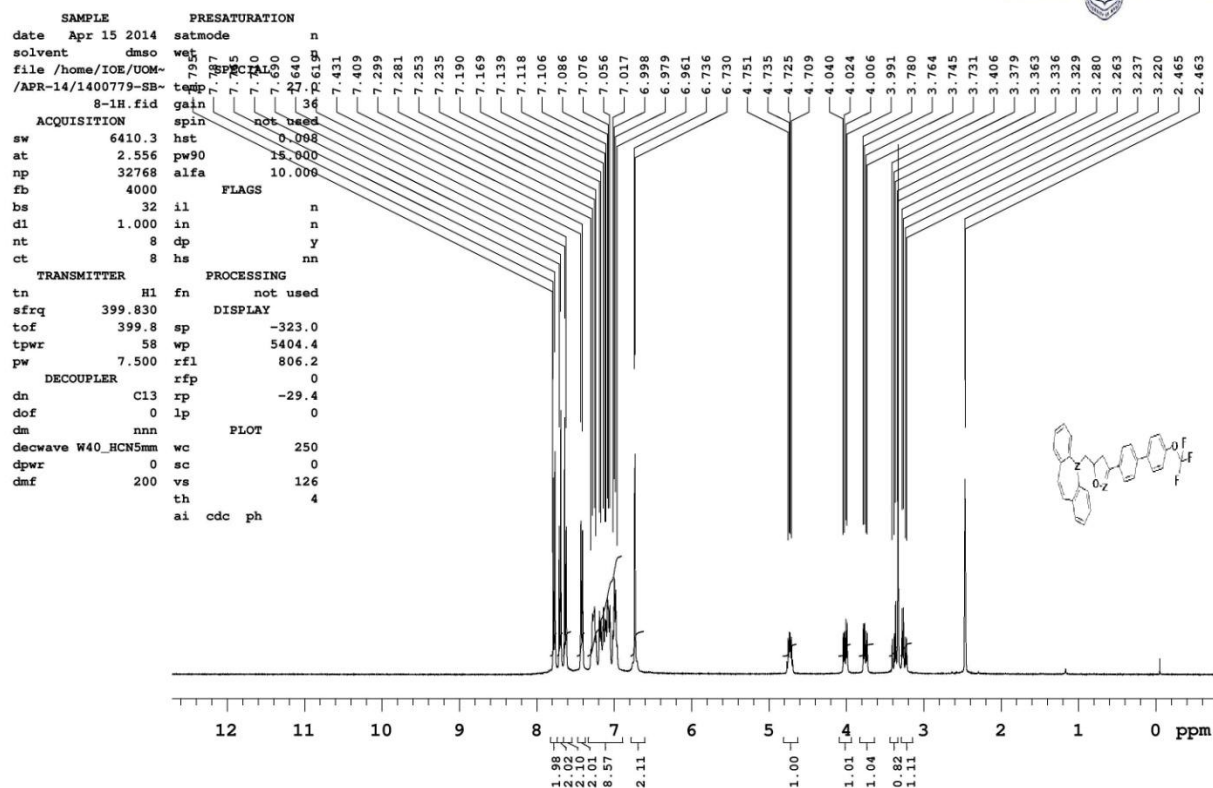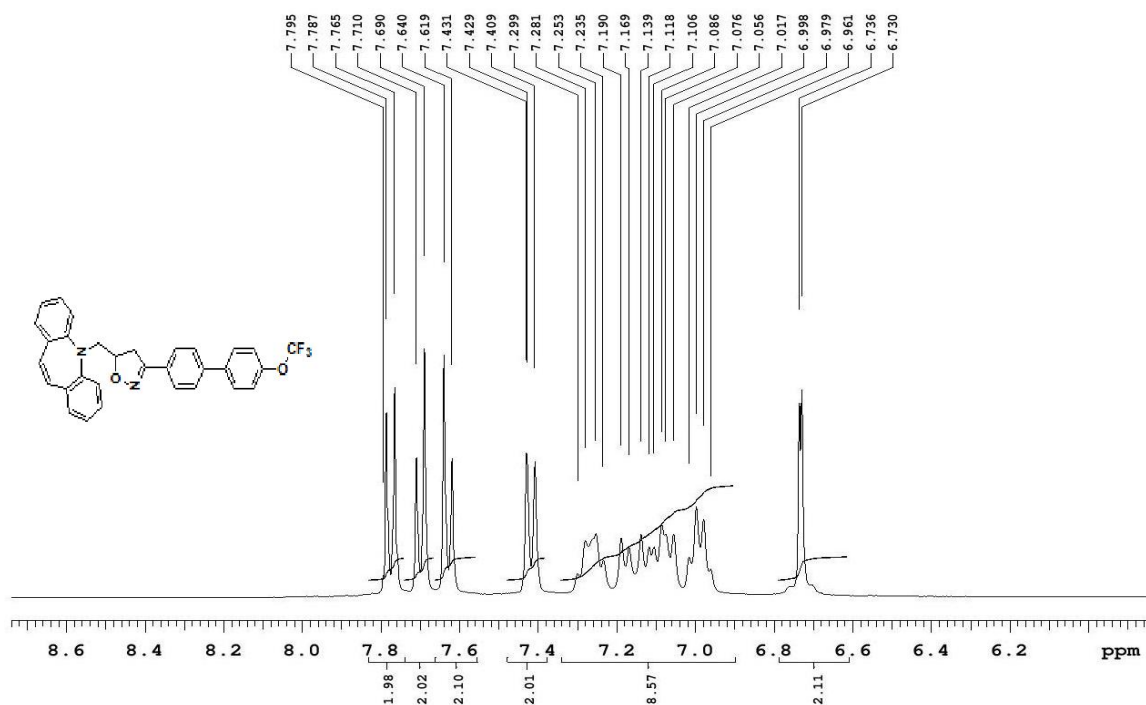

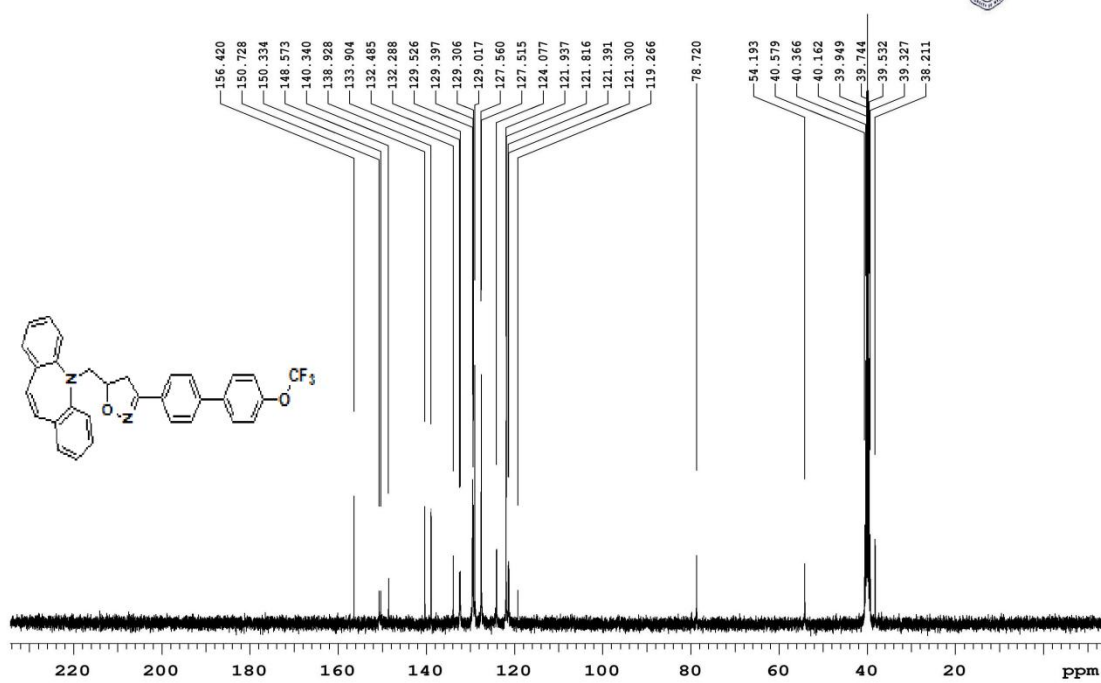

**Figure S20** Mass, <sup>1</sup>H and <sup>13</sup>C NMR spectra of compound **8g**

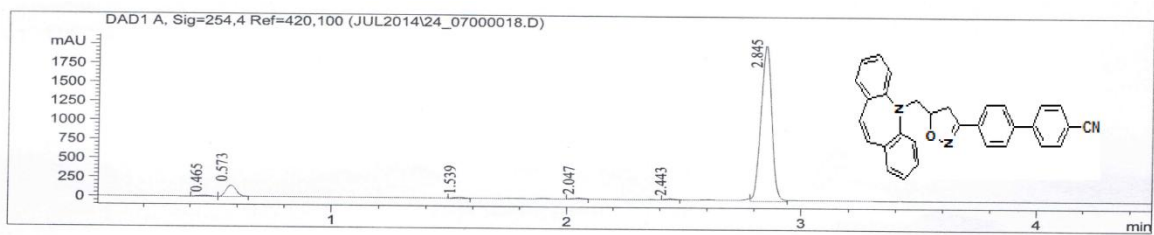

| Peak No | RT min | Area     | Area % |
|---------|--------|----------|--------|
| 1       | 0.465  | 52.900   | 0.731  |
| 2       | 0.573  | 447.180  | 6.183  |
| 3       | 1.539  | 53.904   | 0.745  |
| 4       | 2.047  | 57.944   | 0.801  |
| 5       | 2.443  | 45.003   | 0.622  |
| 6       | 2.845  | 6575.271 | 90.917 |

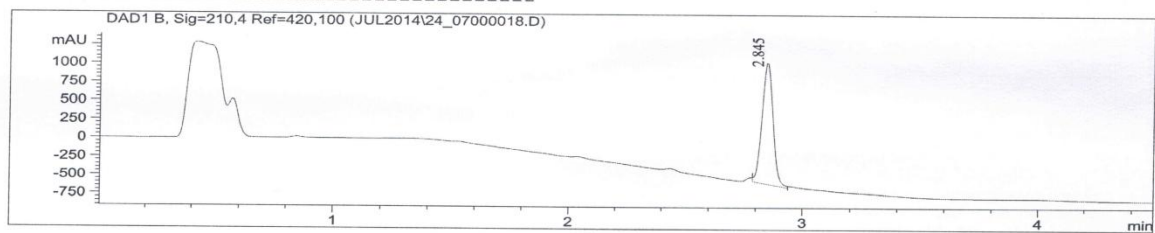

| Peak No | RT min | Area     | Area %  |
|---------|--------|----------|---------|
| 1       | 2.845  | 5280.222 | 100.000 |

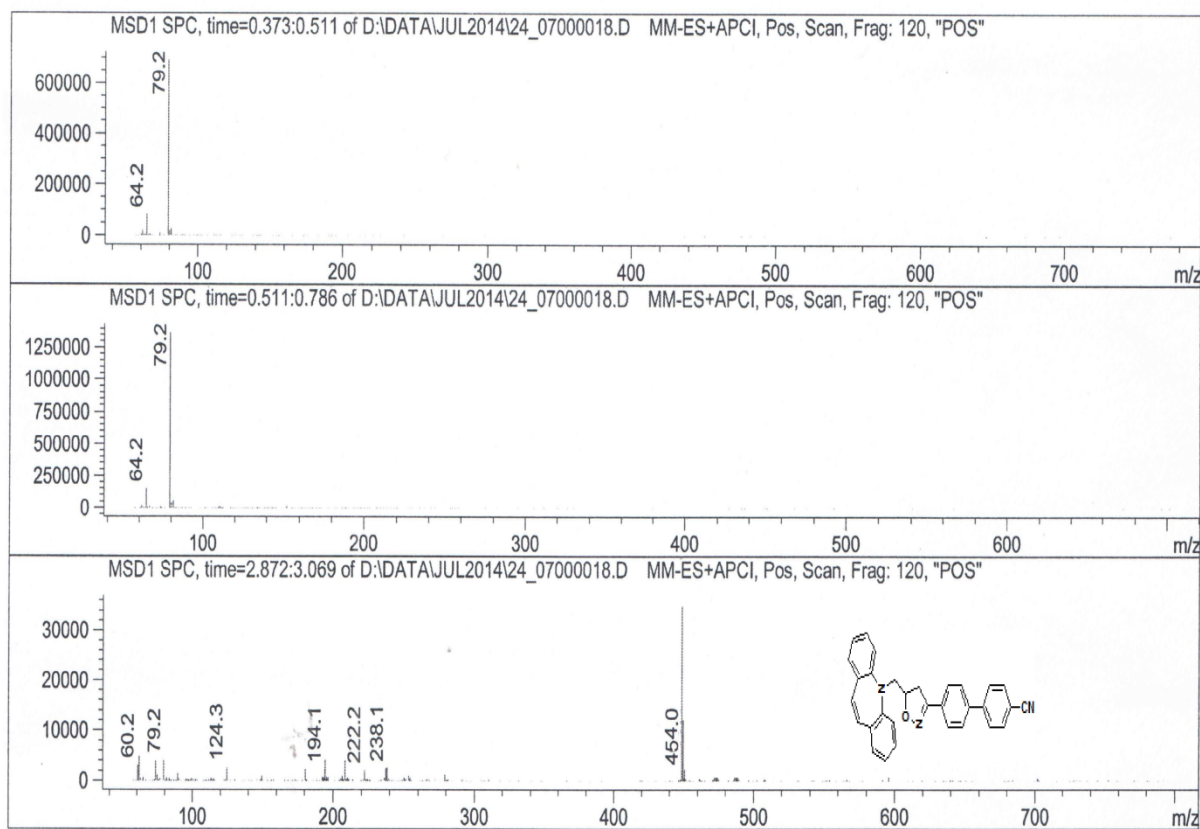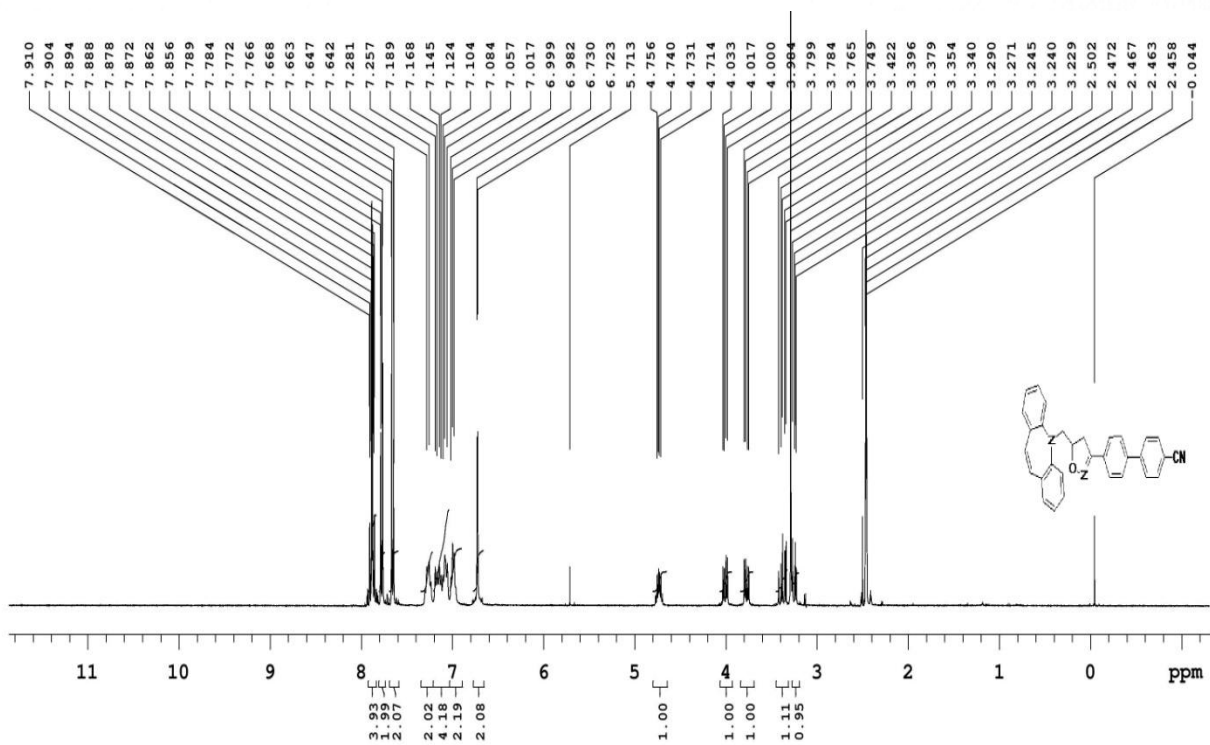

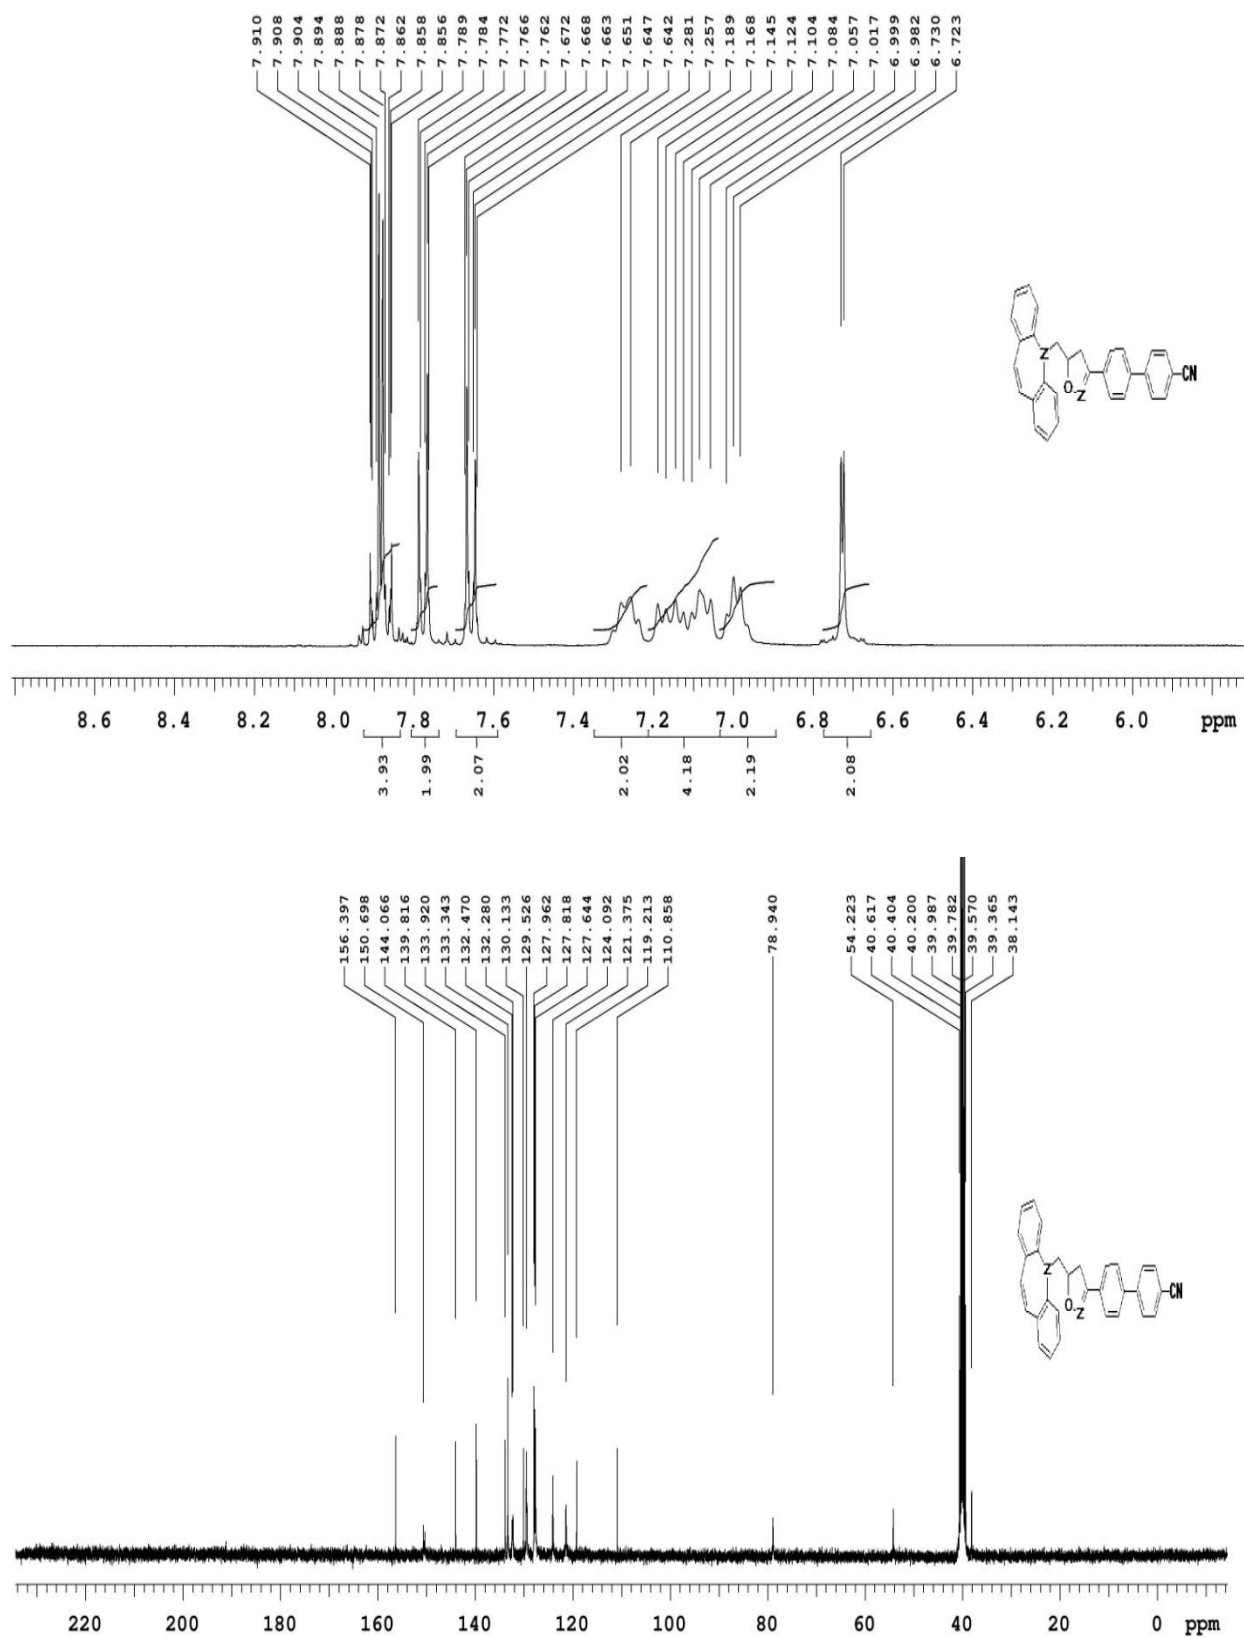

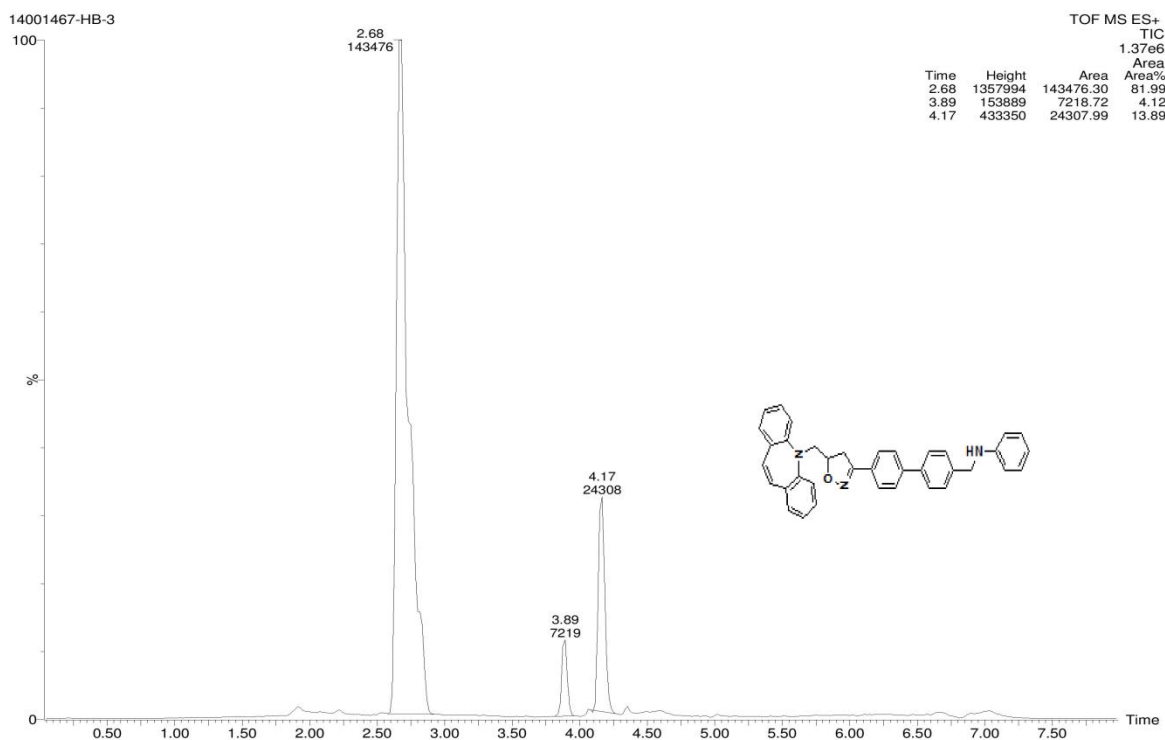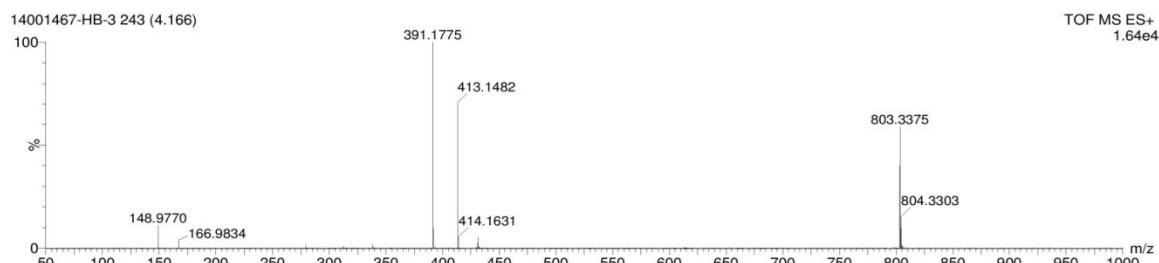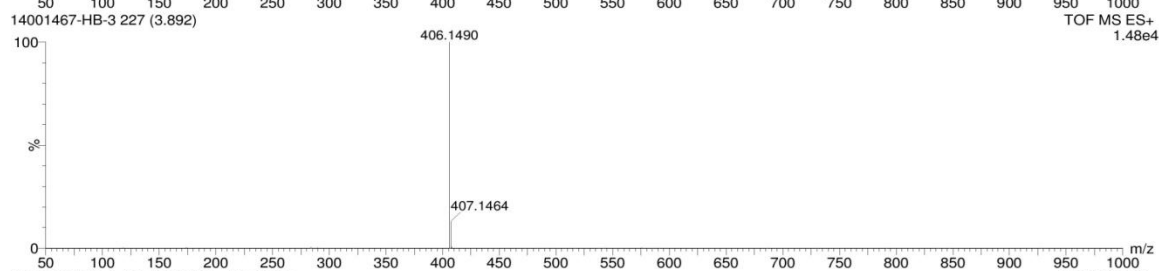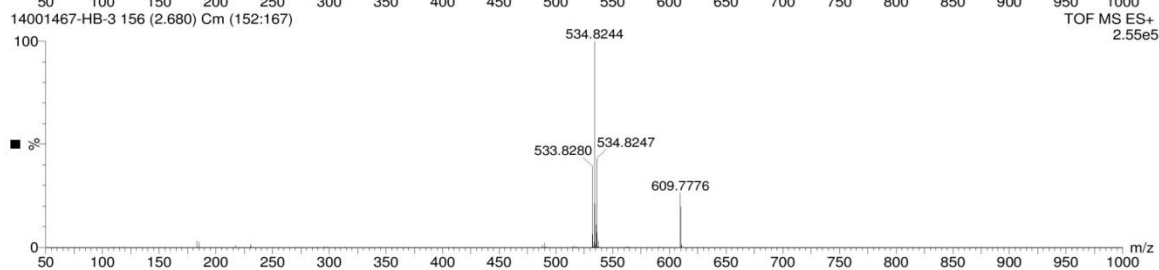

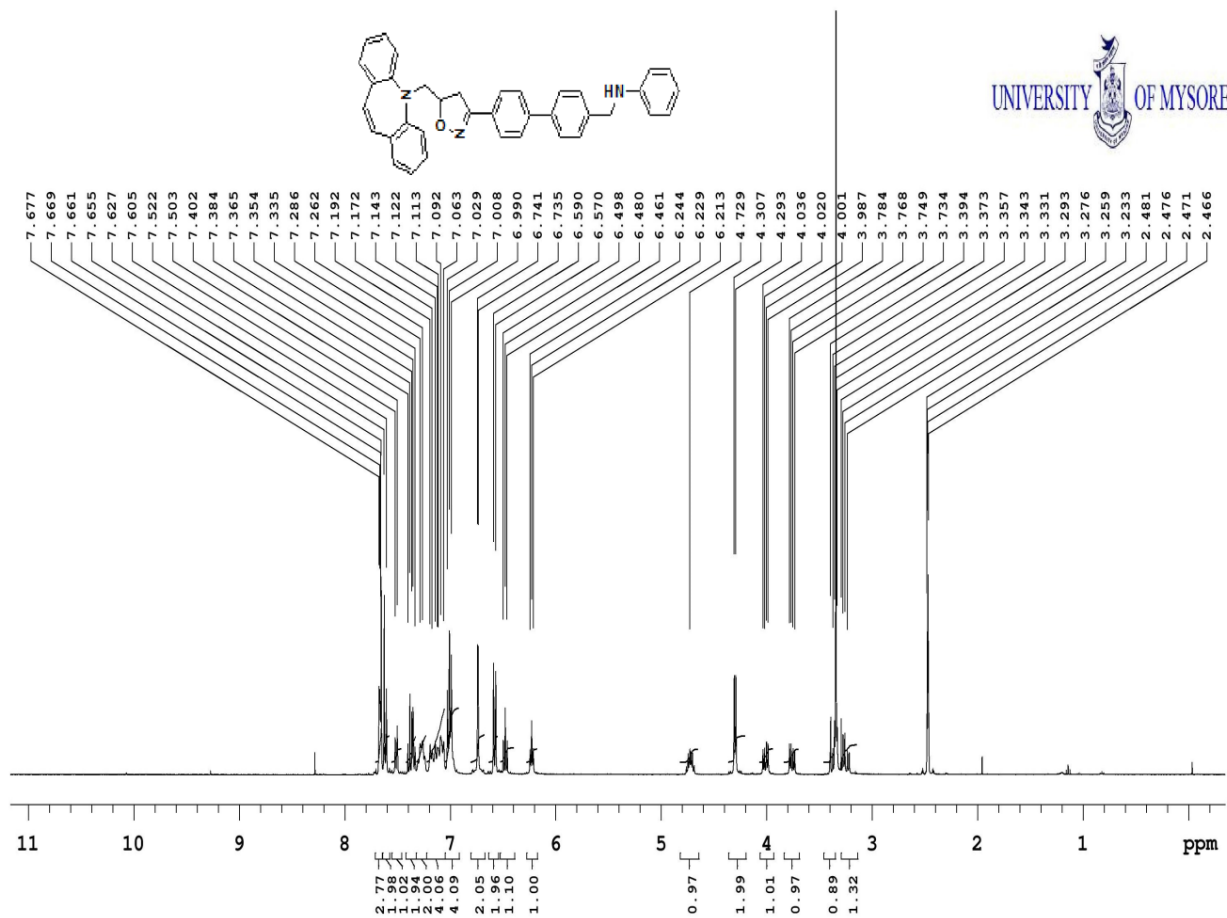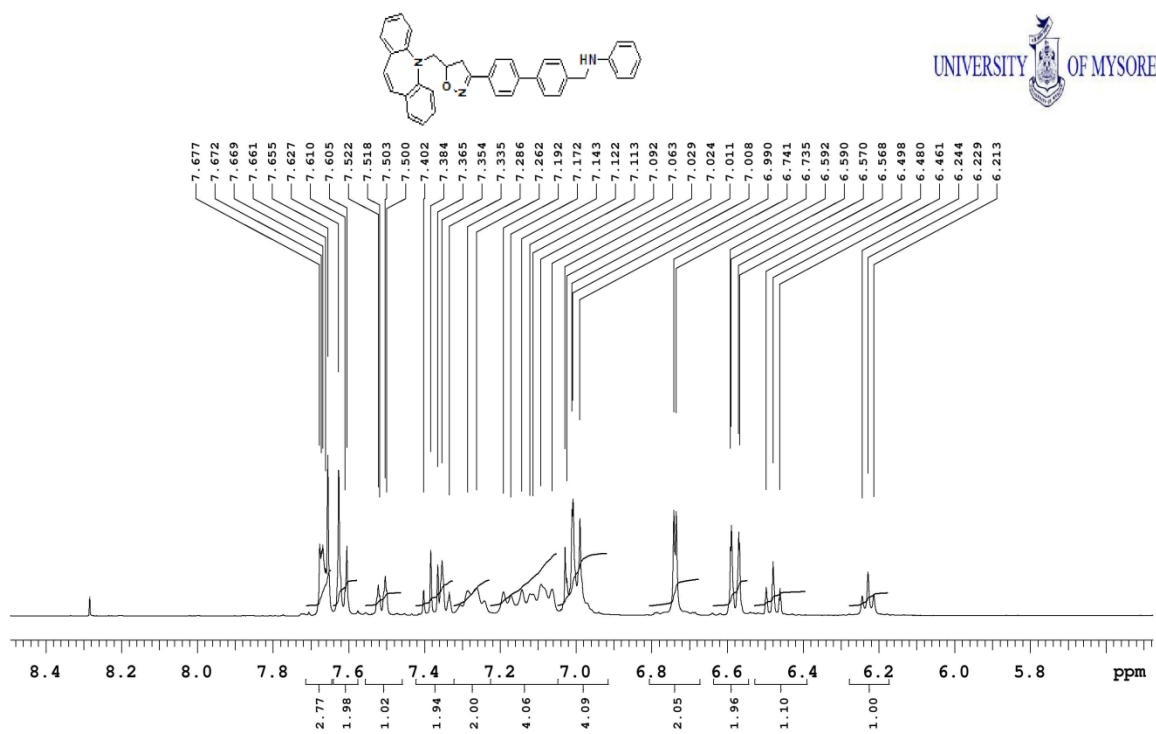

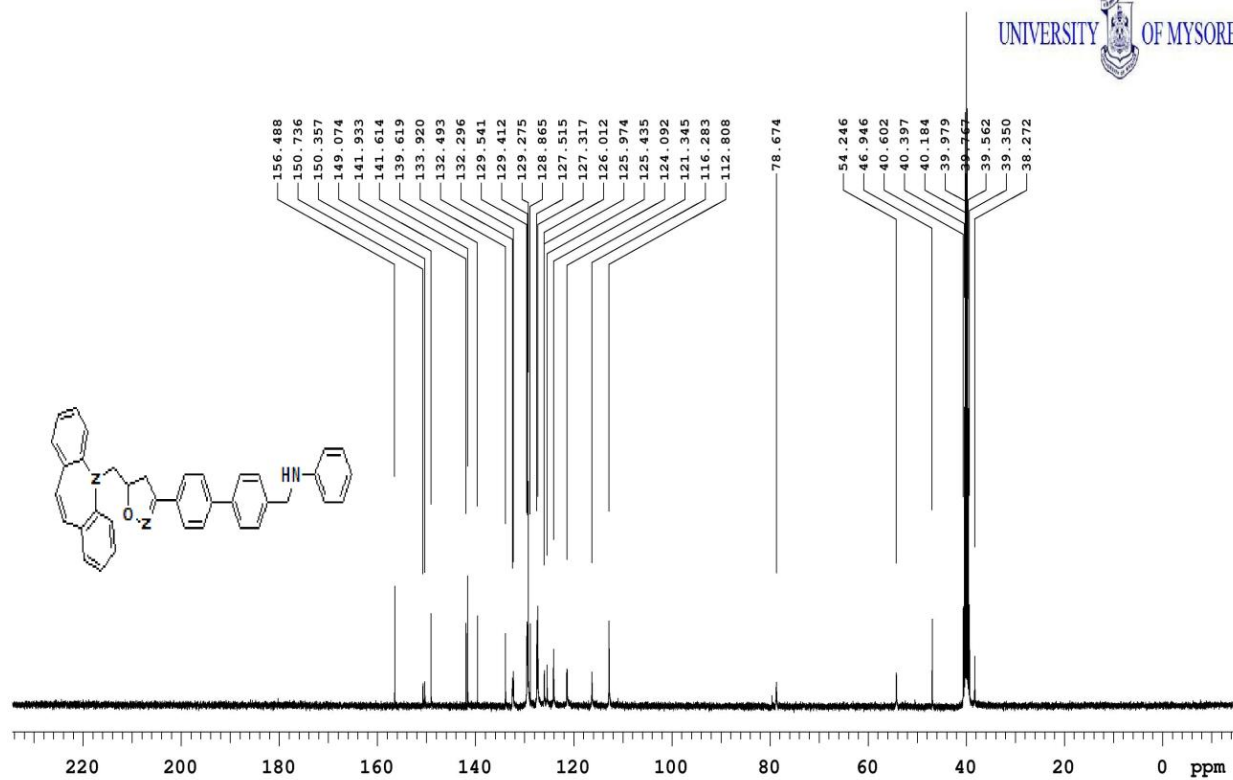

**Figure S22** Mass,  $^1\text{H}$  and  $^{13}\text{C}$  NMR spectra of compound **8i**



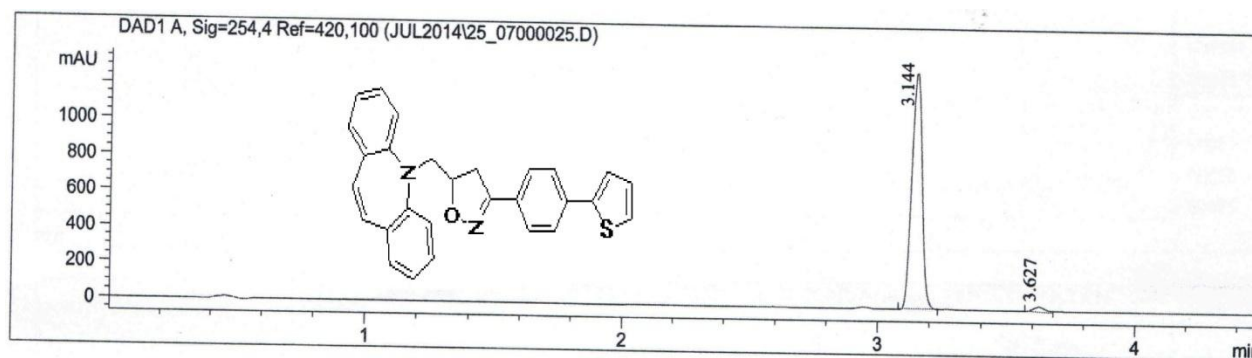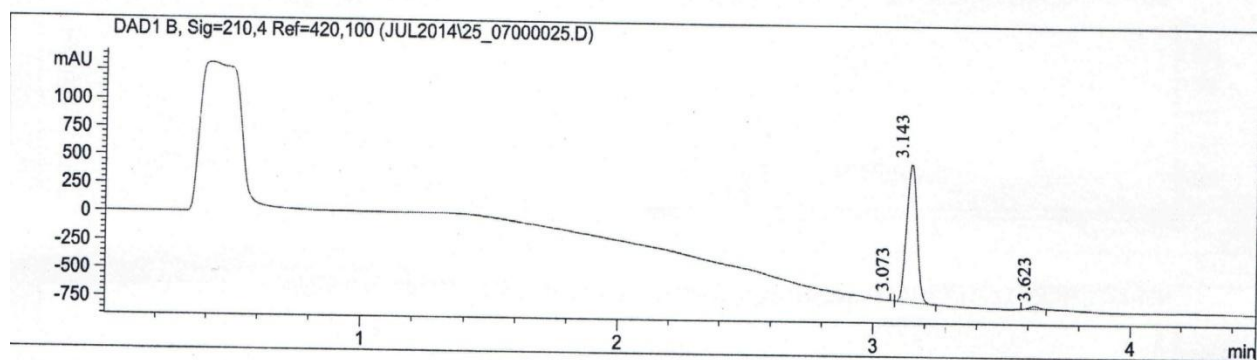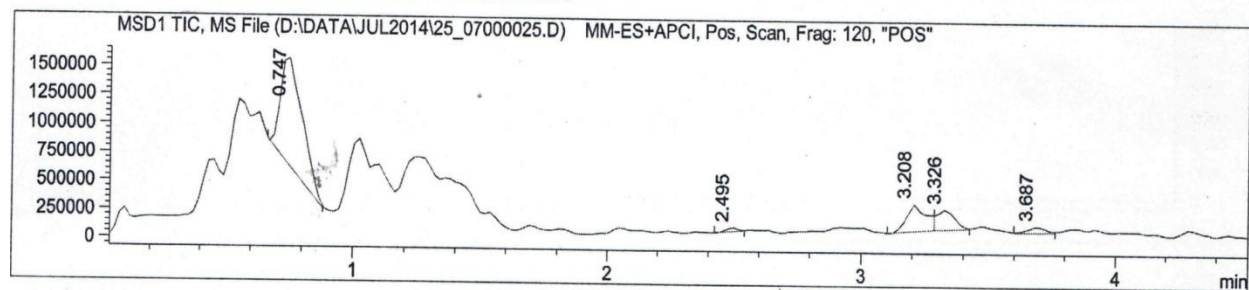

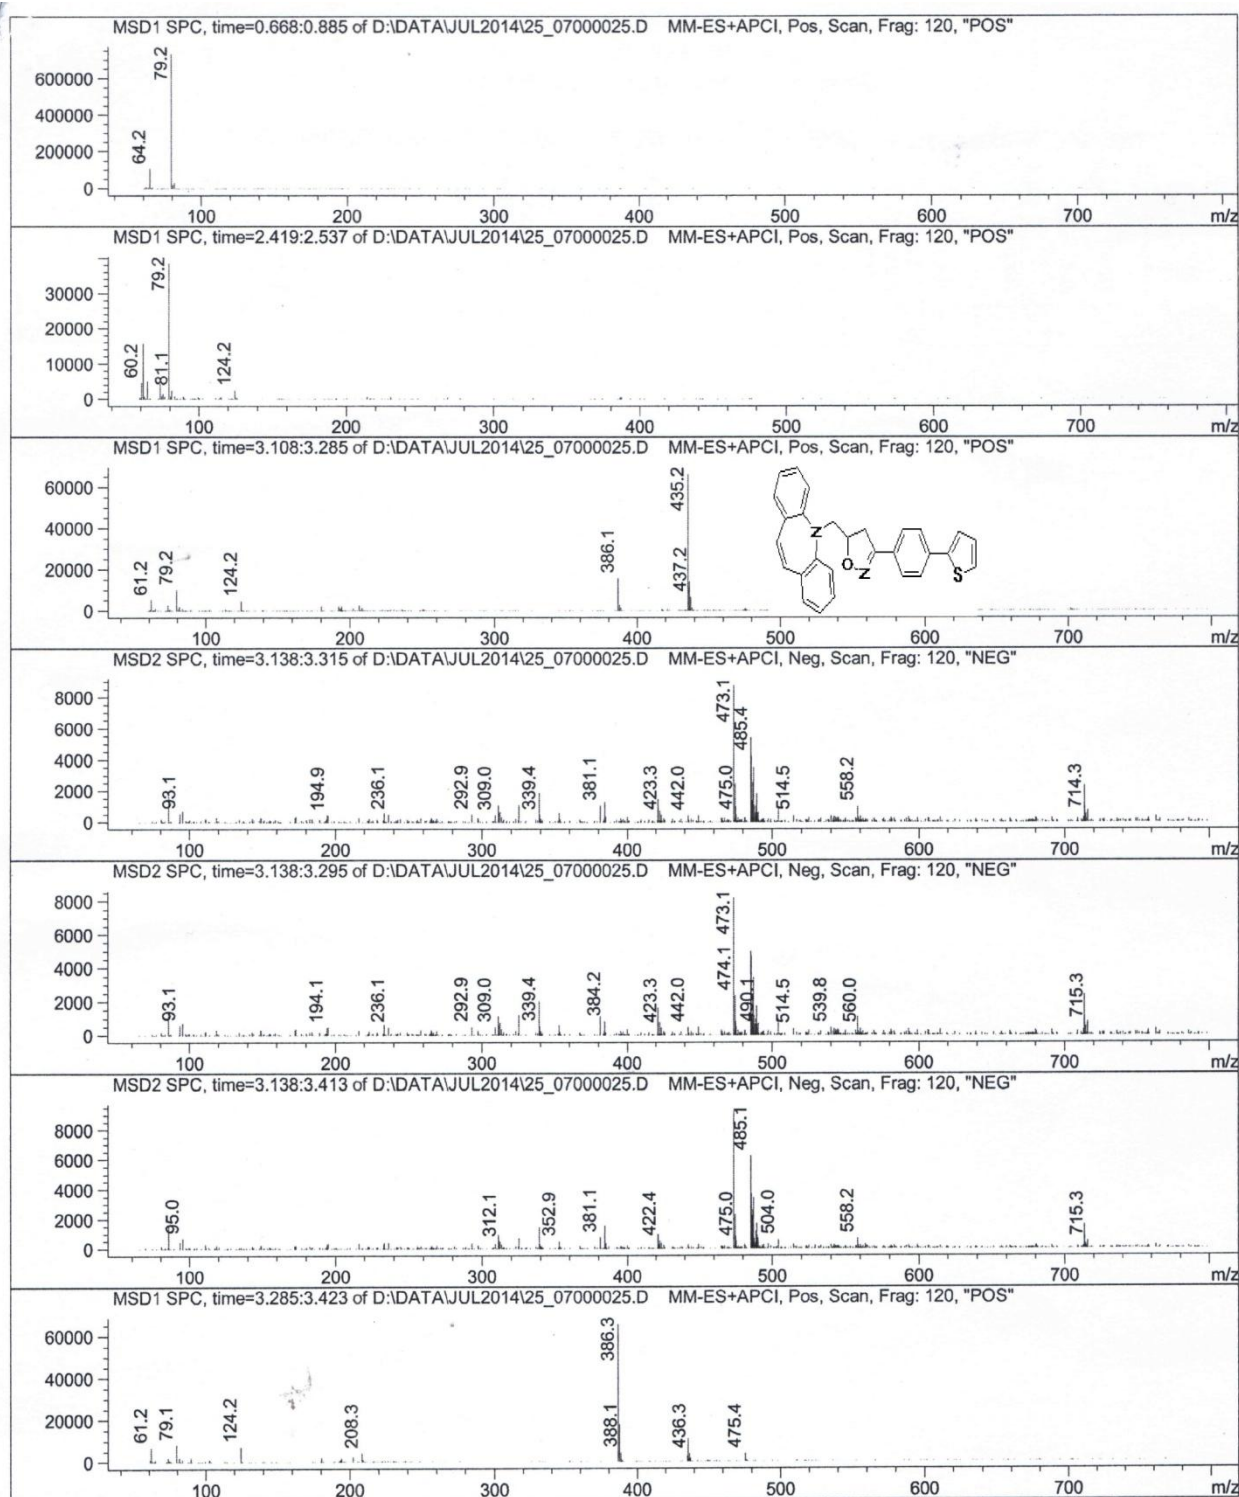

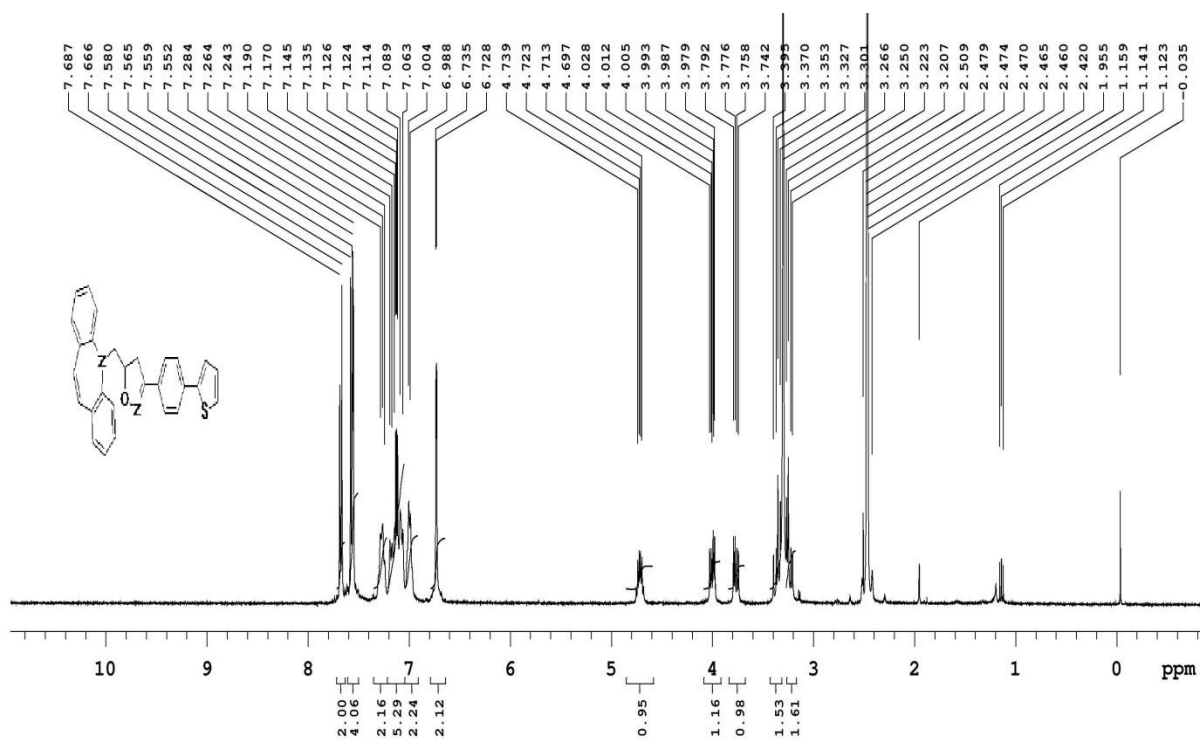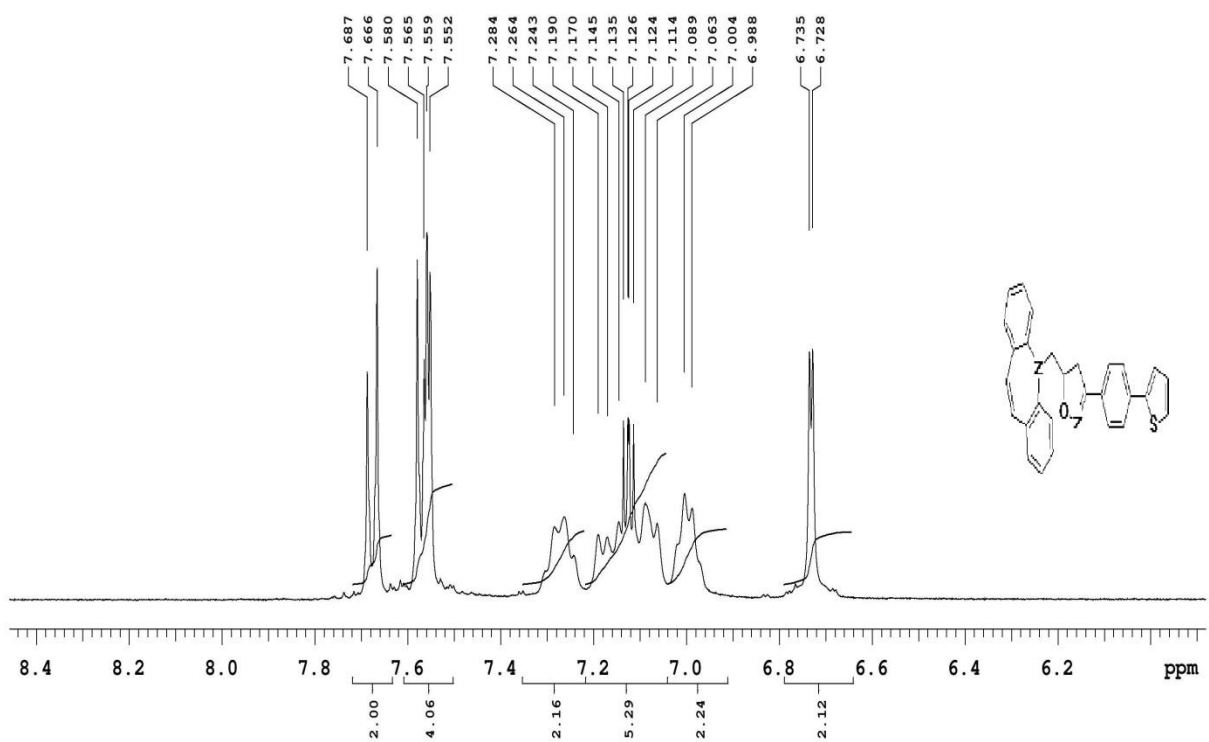

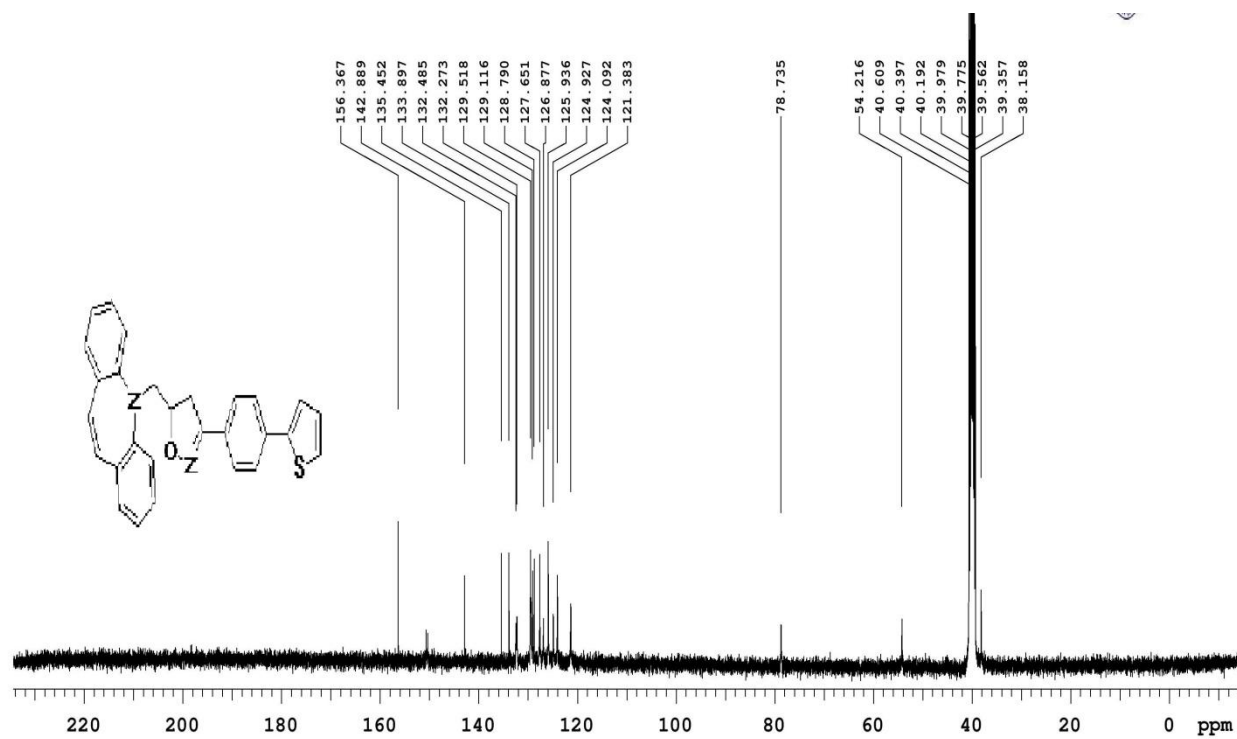

**Figure S23** Mass,  $^1\text{H}$  and  $^{13}\text{C}$  NMR spectra of compound **8j**

LC-MS REPORT  
Connexios Life Sciences Pvt Ltd

Data file : D:\DATA\JUL2014\18\_07000028.D Vial No : Vial 23  
Acquired Method : C:\CHEM32\1\METHODS\GRAD\_FA\_4\_5MIN\_CLM- Injection Vol : 5.00µL  
Injection Date : Fri, Jul.18. 2014 , 5:45:54 PM  
Sample Name : 88/287 B

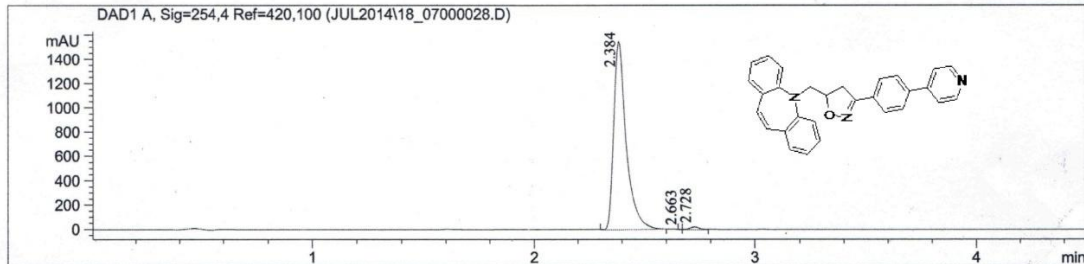

| Peak No | RT min | Area     | Area % |
|---------|--------|----------|--------|
| 1       | 2.384  | 6079.729 | 98.390 |
| 2       | 2.663  | 7.434    | 0.120  |
| 3       | 2.728  | 92.038   | 1.489  |

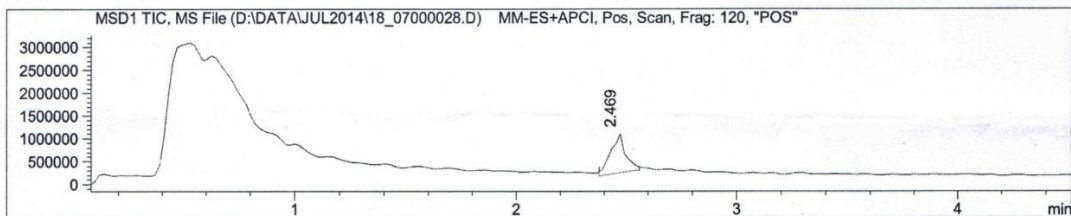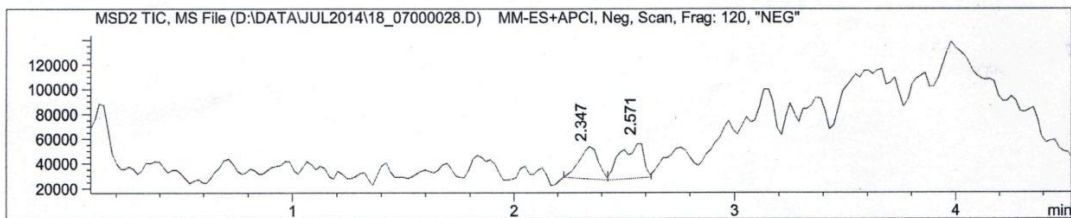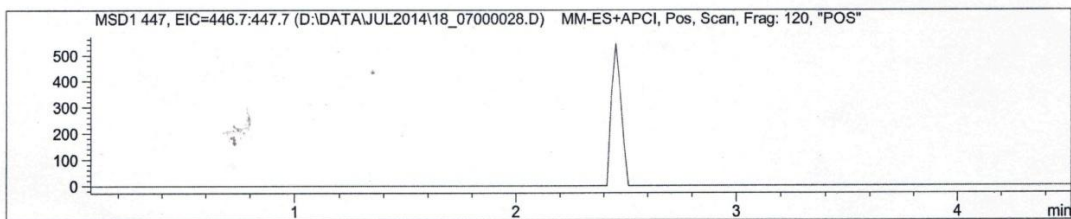

Analysed by: Jeyakumar  
Instrument code: CON/LCMS/001  
7/18/2014 5:54:05 PM

Page 1 of 2



LC-MS REPORT  
Connexios Life Sciences Pvt Ltd

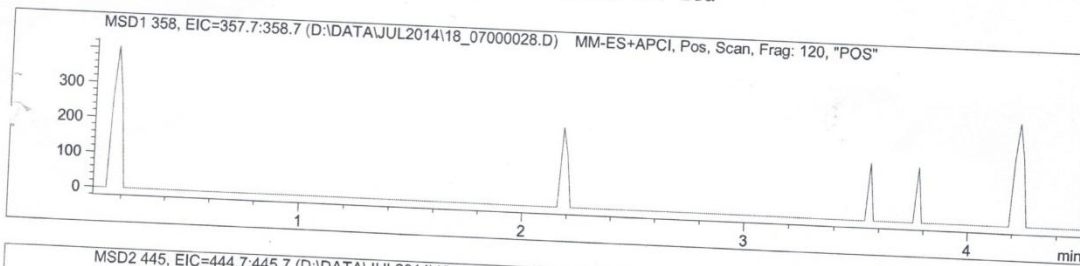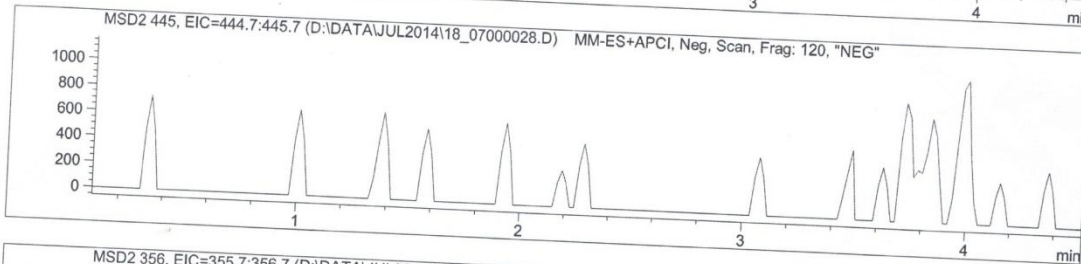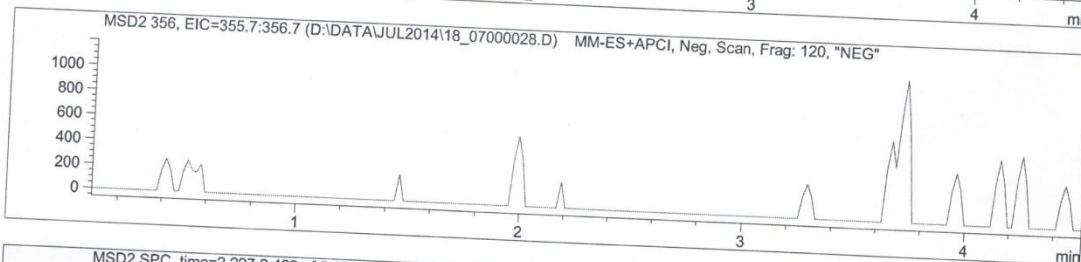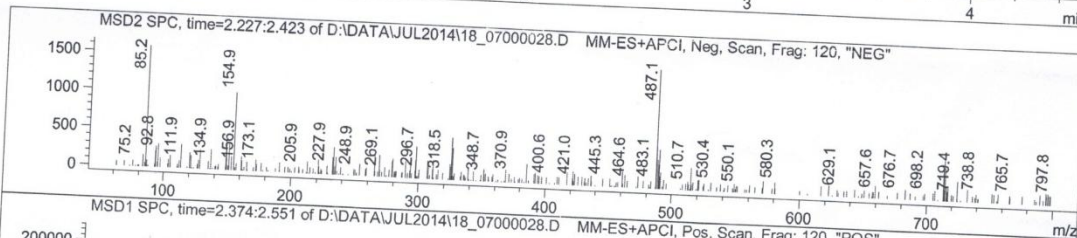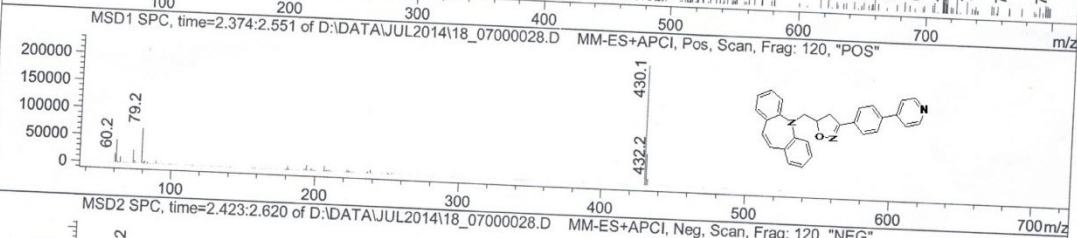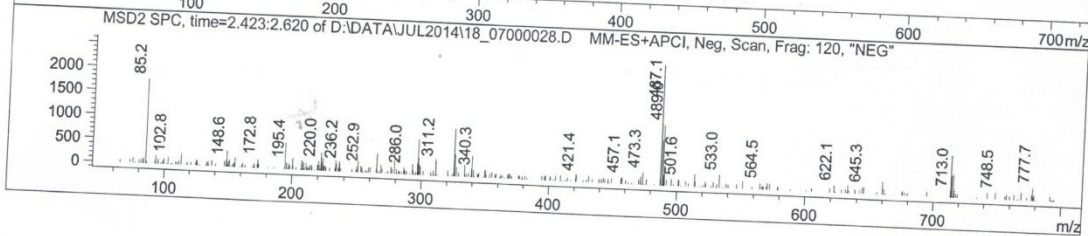

Analysed by: Jeyakumar  
Instrument code: CON/LCMS/001  
7/18/2014 5:54:05 PM

1400756-SB1-1H

expl1 PROTON

SAMPLE PRESATURATION  
 date Apr 11 2014 satmode n  
 solvent dmsd wet n  
 file /home/IOE/UOM- SPECIAL  
 /APR-14/1400756-SB- temp not used  
 1-H.fid gain 30  
 ACQUISITION spin not used  
 sw 6410.3 hst 0.008  
 at 2.556 pw90 15.000  
 np 32768 alfa 10.000  
 fb 4000  
 bs 2 il  
 dl 1.000 in  
 nt 8 dp  
 ct 8 hs  
 TRANSMITTER PROCESSING  
 tn H1 fn not used  
 sfrq 399.830 DISPLAY  
 tof 399.8 sp -173.5  
 tpwr 58 wp 5066.3  
 pw 7.500 rfl 806.2  
 DECOUPLER rfp 0  
 dn C13 rp -22.4  
 dof 0 lp 0  
 dm nnn PLOT  
 decwave W40\_HCN5mm wc 250  
 dpwr 0 sc 0  
 dmf 200 vs 599  
 th  
 ai cdc ph 8

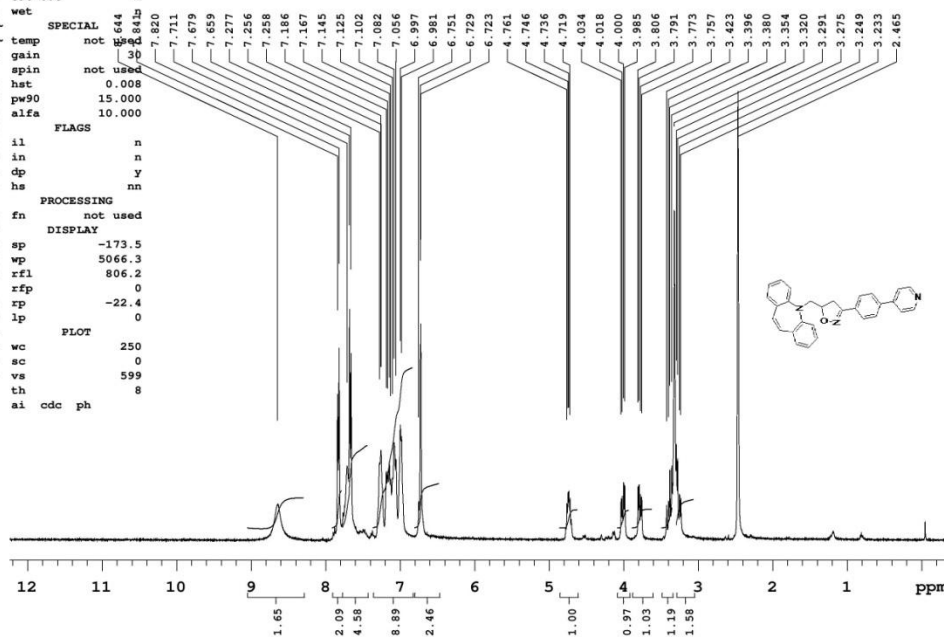

1400756-SB1-1H

expl1 PROTON

SAMPLE PRESATURATION  
 date Apr 11 2014 satmode n  
 solvent dmsd wet n  
 file /home/IOE/UOM- SPECIAL  
 /APR-14/1400756-SB- temp not used  
 1-H.fid gain 30  
 ACQUISITION spin not used  
 sw 6410.3 hst 0.008  
 at 2.556 pw90 15.000  
 np 32768 alfa 10.000  
 fb 4000  
 bs 2 il  
 dl 1.000 in  
 nt 8 dp  
 ct 8 hs  
 TRANSMITTER PROCESSING  
 tn H1 fn not used  
 sfrq 399.830 DISPLAY  
 tof 399.8 sp 2365.7  
 tpwr 58 wp 1555.2  
 pw 7.500 rfl 806.2  
 DECOUPLER rfp 0  
 dn C13 rp -22.4  
 dof 0 lp 0  
 dm nnn PLOT  
 decwave W40\_HCN5mm wc 250  
 dpwr 0 sc 0  
 dmf 200 vs 599  
 th  
 ai cdc ph 8

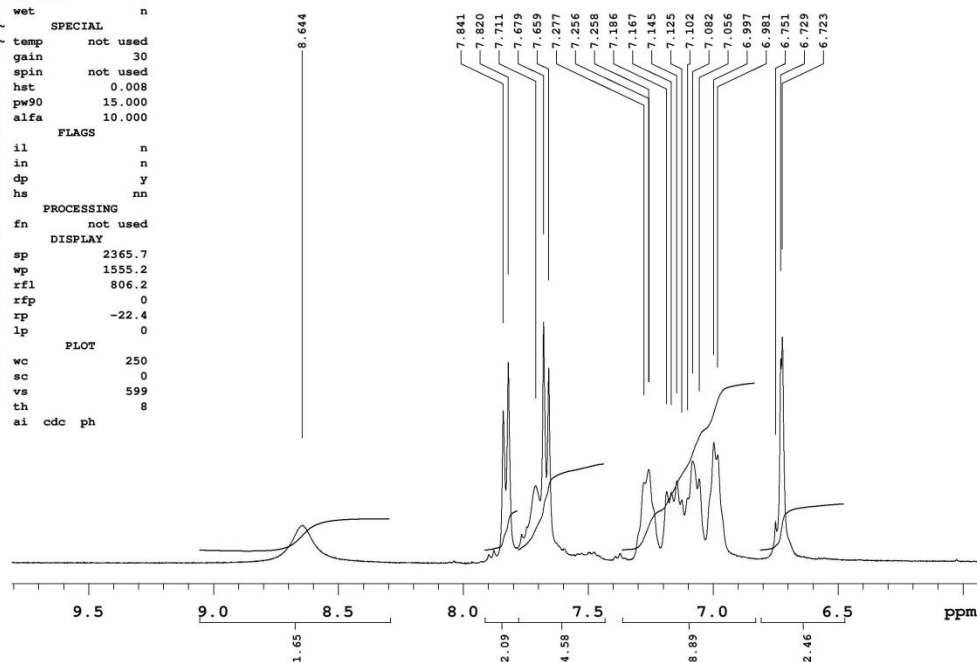

1400757-SB1-13C

exp1 CARBON

SAMPLE  
date Apr 11 2014  
solvent dmsc  
file /home/IOE/UOM-  
/APR-14/1400757-SB-  
1-13C.fid  
ACQUISITION  
sw 25000.0  
at 1.311  
np 65536  
fb 17000  
bs 64  
dl 1.000  
nt 2048  
ct 384  
TRANSMITTER  
tn C13  
sfrq 100.548  
tof 1530.9  
tpwr 57  
pw 5.000  
DECOUPLER  
dn H1  
dof 0  
dm yyy  
decwave w  
dpwr 40  
dmf 10000

PRESATURATION  
satmode n  
wet  
SPECIAL  
temp not  
gain 1.50  
spin not used  
hst 0.008  
pw90 10.000  
alfa 10.000  
FLAGS  
il n  
in n  
dp y  
hs nn  
PROCESSING  
lb 0.50  
fn not used  
DISPLAY  
sp -951.9  
wp 19999.7  
rfi 1441.0  
rfp 0  
xp 138.5  
lp 0  
PLOT  
wc 250  
sc 0  
vs 49906  
th 5  
ai cdc ph

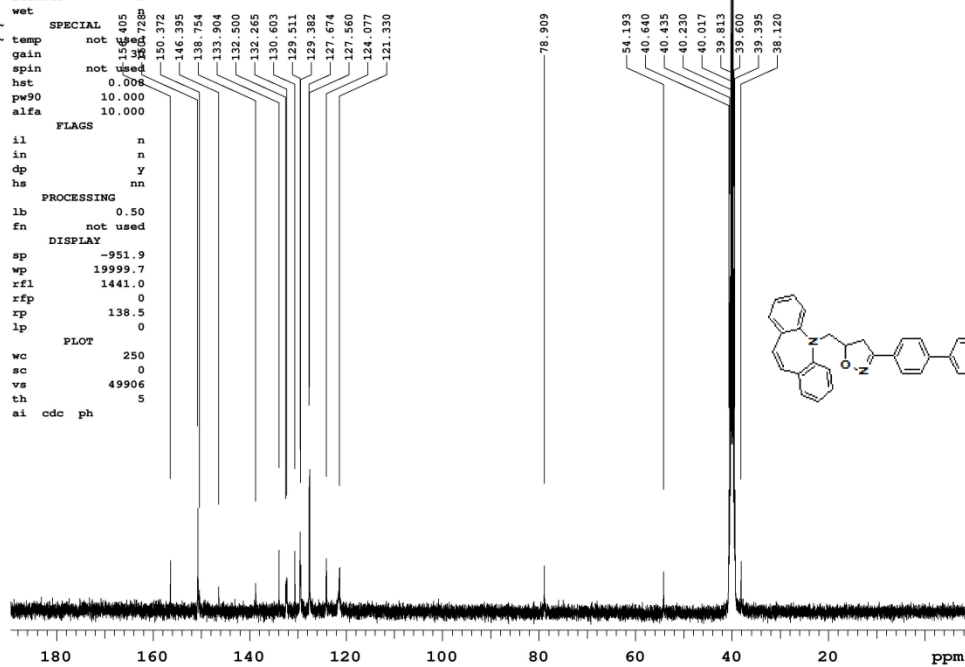

Figure S24 Mass,  $^1\text{H}$  and  $^{13}\text{C}$  NMR spectra of compound 8k



Data file : D:\DATA\JUL2014\22\_07000012.D Vial No : Vial 8  
 Acquired Method : C:\CHEM32\1\METHODS\GRAD\_FA\_4\_5MIN\_CLM- Injection Vol : 5.00µL  
 Injection Date : Tue, Jul.22. 2014 , 2:39:30 PM  
 Sample Name : 92/287-F1

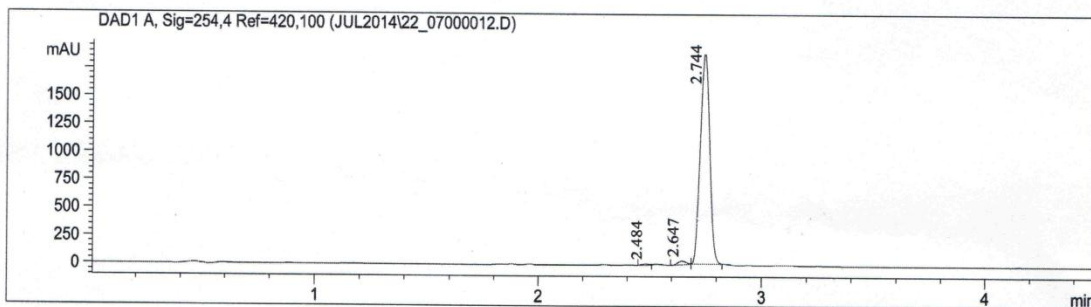

| Peak No | RT min | Area     | Area % |
|---------|--------|----------|--------|
| 1       | 2.484  | 31.261   | 0.549  |
| 2       | 2.647  | 92.590   | 1.626  |
| 3       | 2.744  | 5570.065 | 97.825 |

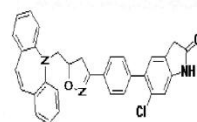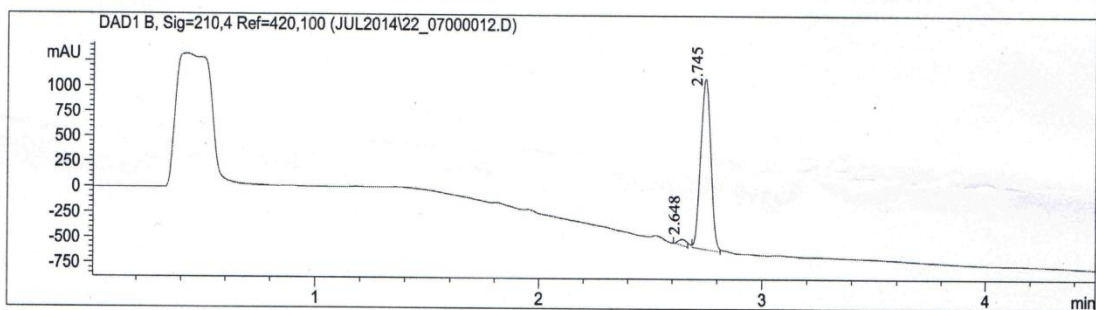

| Peak No | RT min | Area     | Area % |
|---------|--------|----------|--------|
| 1       | 2.648  | 161.431  | 2.938  |
| 2       | 2.745  | 5333.346 | 97.062 |

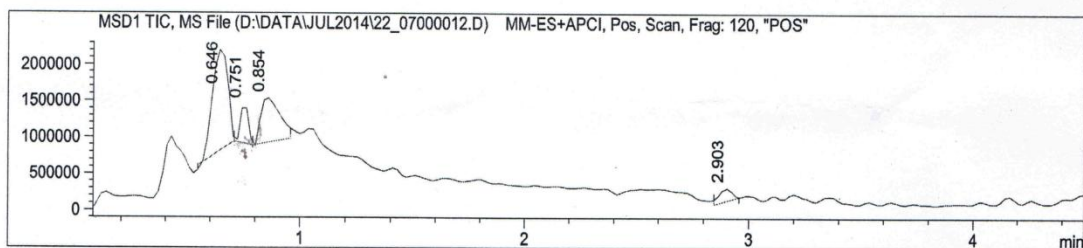

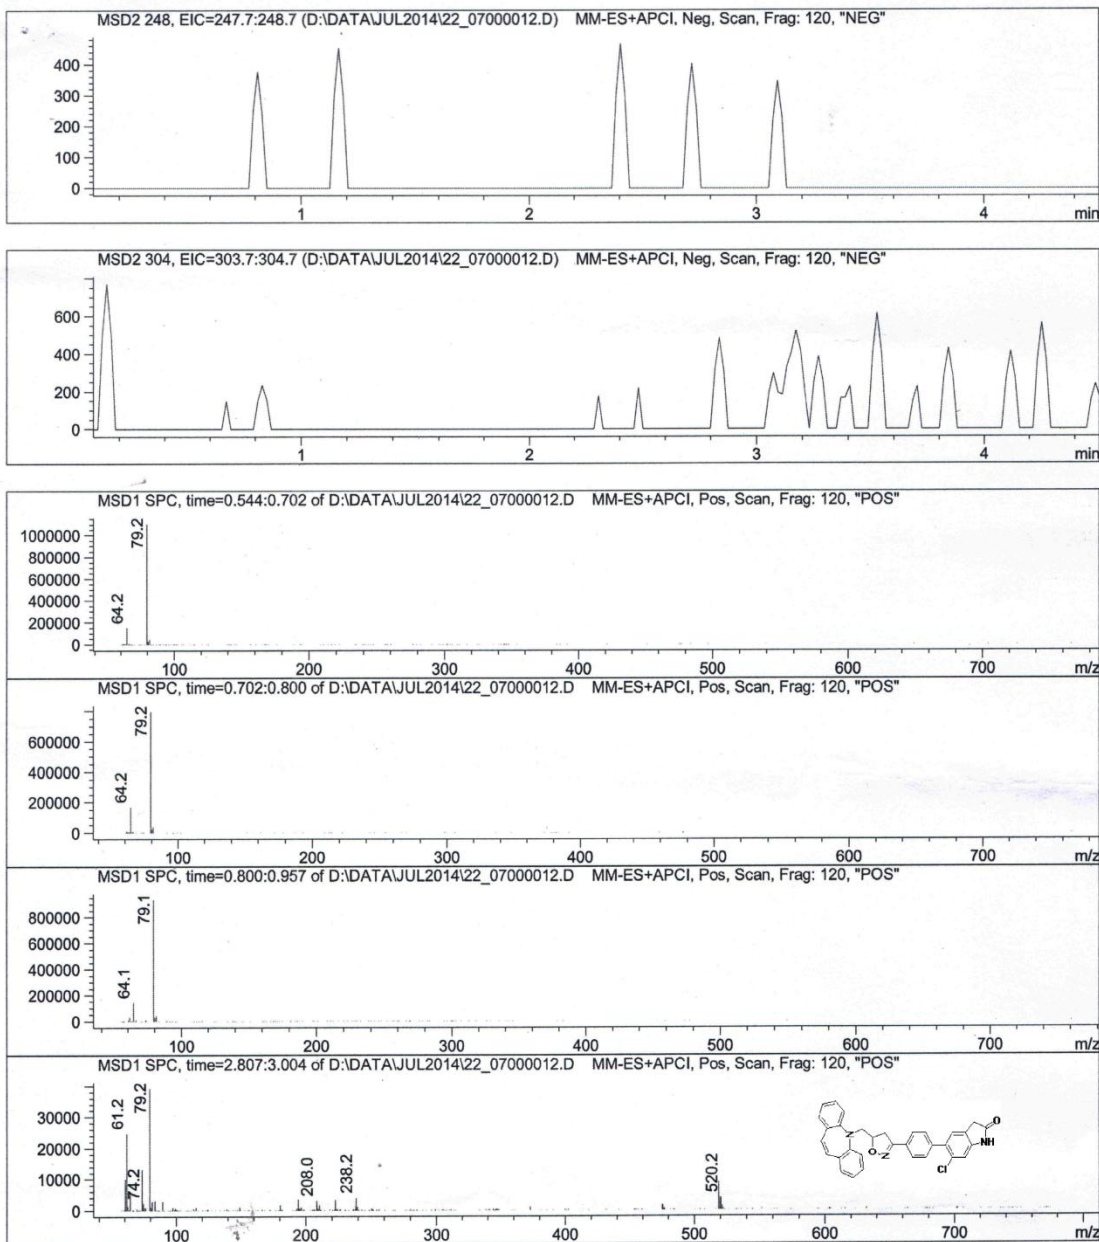

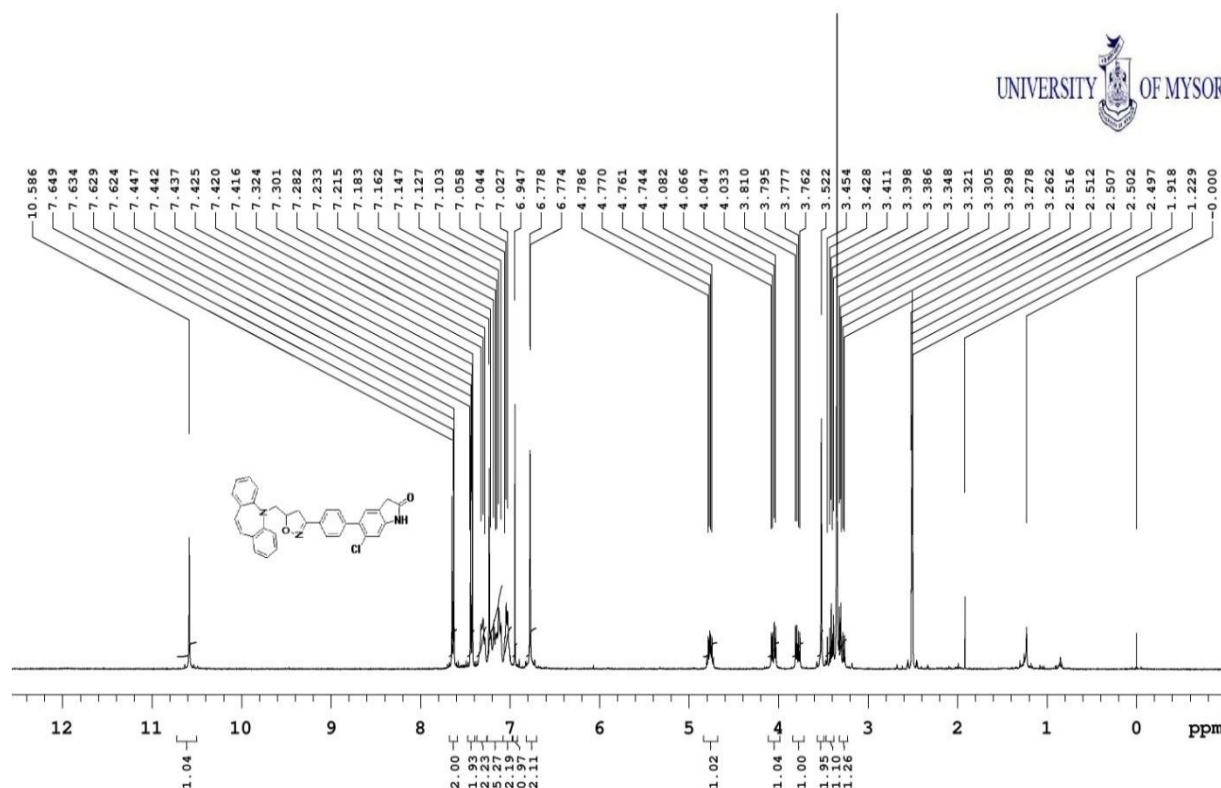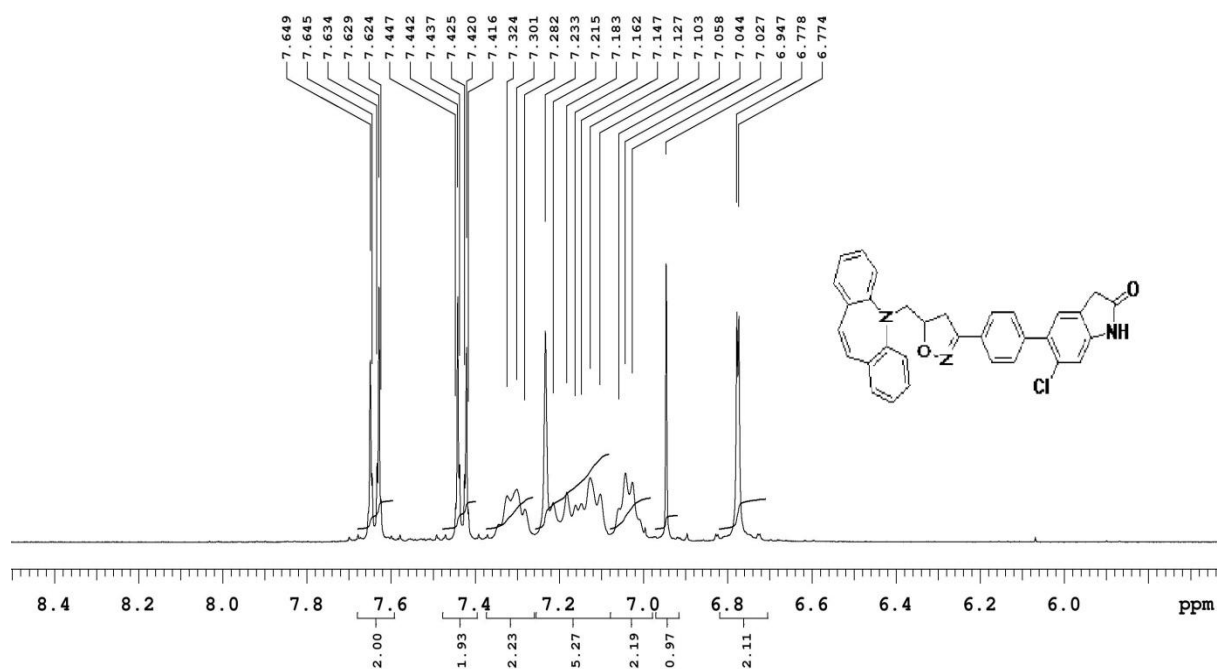

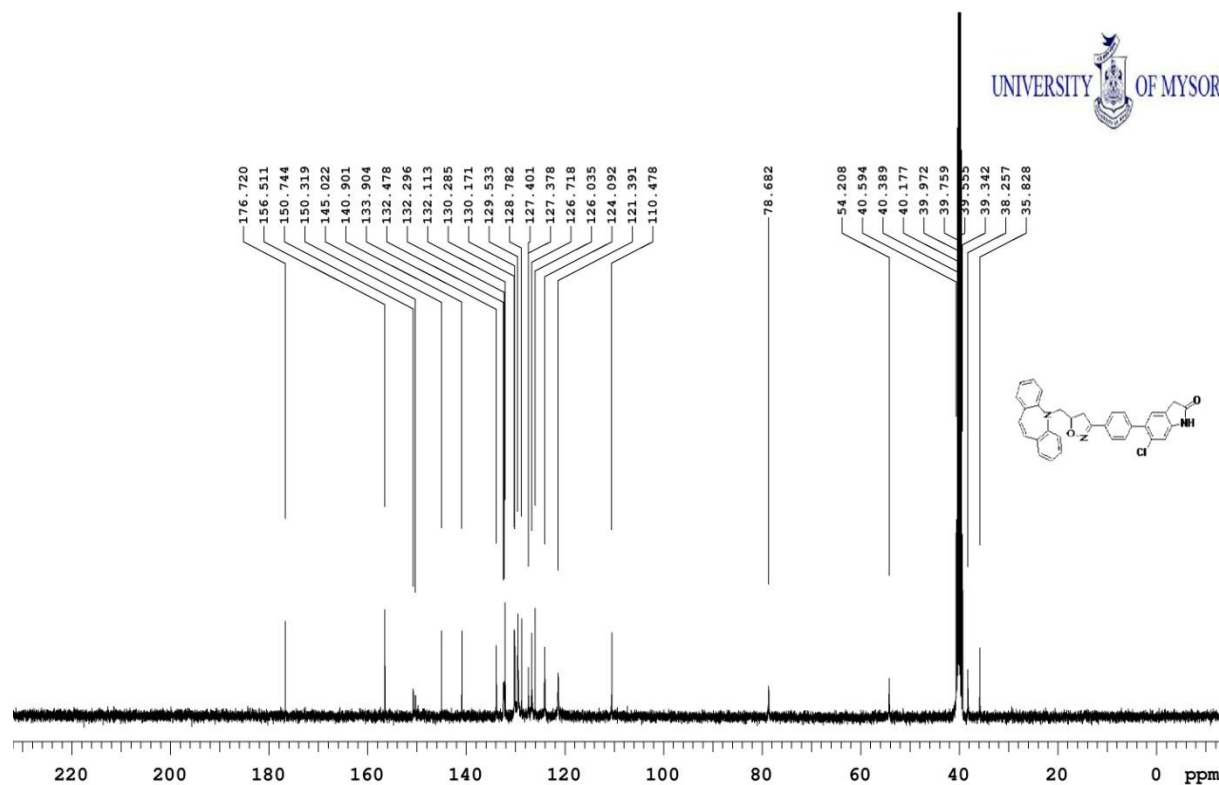

**Figure S25** Mass, <sup>1</sup>H and <sup>13</sup>C NMR spectra of compound **8l**
